# Supplementary material for: Identification of Toxoplasma gondii Genes Responsive to the Host Immune Response during In Vivo Infection
Source: PLoS One. 2012 Oct 10;7(10):e46621. doi: 10.1371/journal.pone.0046621 (PMC3468626; doi:10.1371/journal.pone.0046621)
Supplement: Table S1 — Genes whose expression is downregulated in vivo in wild type C57/BL6 and IFNKO mice compared to in vitro samples. (XLS) [file pone.0046621.s001.xls]

## Sheet: Wild type only
Probesets	Corrected p-value	Fold change: in vitro/wt	GeneID (ToxoDBv5)	Description of parasite gene v4	in vitro 1	in vitro 2	in vitro 3	in vitro 4	in vivo1	in vivo2	in vivo3	in vivo 4	IFNKO 1	IFNKO 2	IFNKO 3
1.m00014_at	0.000347733	2.37959	TGME49_000010	hypothetical protein	9.86386	9.9251	9.83052	10.0863	8.72256	8.52839	8.8002	8.65177	9.25488	9.13072	9.24775
113.m00766_at	0.00166579	2.86409	TGME49_097210	hypothetical protein	8.48576	8.68723	8.04503	8.10589	6.77926	6.73271	7.09041	6.64921	7.80546	7.81709	7.91885
113.m00774_at	0.00261051	3.22289	TGME49_097340	hypothetical protein	6.66964	7.21655	7.13162	7.20398	5.43193	5.87313	4.94023	5.22309	6.559	6.34097	6.56261
113.m00775_at	0.00710148	2.12163	TGME49_097350	hypothetical protein	7.87972	7.73526	7.12507	7.84554	6.29365	6.74564	6.45132	6.7543	7.05063	6.79758	7.04734
113.m00782_at	0.00347692	2.03658	TGME49_097470	myosin light chain-related	8.87301	8.90158	9.01397	9.13132	7.6885	7.71523	8.20929	8.20228	8.57925	8.3322	8.55238
113.m00787_at	0.00727616	2.74375	TGME49_097530	DNA-directed RNA polymerase I, beta subunit	6.91334	6.96188	6.86157	7.06182	5.79797	5.00984	6.13223	5.03395	6.51009	5.39963	6.43356
113.m00800_at	0.00482564	3.08082	TGME49_097840	DNA primase, large subunit, putative	10.0309	9.81195	9.39816	9.35422	7.67005	7.81454	8.67958	7.93785	9.47736	9.12466	9.39447
113.m00810_at	0.00154214	2.52847	TGME49_098020	snRNP (small nuclear ribonucleoprotein)	8.14697	8.03157	7.83651	7.72301	6.68338	6.31365	6.8864	6.50158	7.86946	7.28889	7.58795
113.m00813_at	0.00801635	2.2361	TGME49_098060	hypothetical protein	8.69358	8.62774	8.27581	7.77377	6.9462	7.42829	7.12479	7.22767	7.50688	6.89376	7.34763
113.m01286_at	0.00710791	2.85023	TGME49_098010	hypothetical protein	9.86314	10.1933	9.59454	9.75922	8.10696	7.83118	9.06149	8.36623	9.49762	9.21472	9.43412
113.m01289_at	0.00788861	2.93679	TGME49_097100	hypothetical protein	8.8623	8.84655	8.5064	8.57638	7.87343	6.53716	7.35851	6.80557	8.28006	8.28006	8.23853
113.m01589_at	0.00886709	2.31565	TGME49_097760	conserved hypothetical protein	6.90253	7.2901	7.40608	7.64602	6.6492	5.70704	6.03266	6.01017	6.49297	6.36071	6.55064
113.m01592_at	0.00964849	2.36603	TGME49_097230	conserved hypothetical protein	7.14117	7.03102	7.47837	7.55032	5.55012	5.83668	6.22464	6.61958	6.42255	6.28506	6.59187
129.m00252_at	0.00379709	3.48693	TGME49_099060	sodium/hydrogen exchanger, putative	7.25376	7.48722	7.87517	8.33997	6.18552	6.19721	5.55271	5.81286	7.47954	7.16125	7.0032
129.m00260_at	0.00631077	3.124	TGME49_099200	transport protein particle (TRAPP) component	8.14896	8.29327	8.45432	8.56893	7.21259	6.51675	7.17401	5.98854	8.37807	7.81745	8.14896
129.m00405_at	0.000534822	2.19811	TGME49_099180	synaptobrevin/VAMP-related protein	6.87291	7.00661	6.70761	6.65097	5.59271	5.75622	5.72444	5.61968	5.96737	5.72999	6.10095
145.m00321_at	0.00908234	2.67855	TGME49_099670	hypothetical protein	11.0917	11.0505	10.5587	10.6613	9.05033	9.12479	10.1965	9.30478	10.5047	10.3941	10.4842
145.m00344_at	0.00554052	3.13061	TGME49_100250	mtN3/saliva family domain-containing protein	8.47751	8.30018	8.08476	8.42909	6.90948	7.23461	6.64899	5.9127	7.71098	7.66353	7.67273
145.m00346_at	0.00409154	2.59291	TGME49_100280	small nuclear ribonucleoprotein (snRNP)	8.87621	8.97431	8.38086	8.57778	7.83819	7.07368	7.28253	7.11648	8.65441	8.19699	8.60439
145.m00353_at	0.00553332	3.07207	TGME49_100380	endoplasmic reticulum oxidoreductin, putative	9.20961	9.19972	9.05695	9.11045	7.89484	6.92476	8.12364	7.15666	8.52117	8.14562	8.34591
145.m00586_at	0.000506704	3.71801	TGME49_100010	hypothetical protein	7.47855	7.32723	7.50831	7.46312	5.26889	5.56897	5.9261	5.43512	7.30063	7.07638	7.07638
145.m00587_at	0.00359683	2.85777	TGME49_100040	ubiquitin-conjugating enzyme E2, putative	8.5077	8.43891	8.9342	8.54375	6.52058	7.34464	7.06398	7.4358	8.3989	7.83906	8.26009
162.m00318_at	0.00100758	2.56976	TGME49_101270	protein kinase domain-containing protein	7.38861	7.44128	6.94133	7.06864	5.72301	5.98004	5.93577	5.75452	6.86256	6.87128	6.87566
162.m00322_at	0.000603357	2.64327	TGME49_101380	GTP-binding protein, putative	7.86652	7.94722	7.6973	7.72687	6.13079	6.47283	6.61121	6.41378	7.27633	7.28754	7.28754
162.m00508_at	0.00444165	2.78354	TGME49_101250	hypothetical protein	10.3774	10.3826	9.8939	10.1145	8.70223	8.34142	9.32437	8.49274	10.0608	9.85133	9.6537
162.m00513_at	0.000985331	4.08481	TGME49_101340	DnaJ domain-containing zinc finger (C2H2 type)	7.98082	7.86717	8.06204	7.99349	5.98423	5.45128	6.42359	5.92333	7.72852	7.03338	7.70815
177.m00020_s_at	0.00924237	3.51234	TGME49_101890	hypothetical protein	9.35284	9.70913	9.73819	9.00327	6.65622	8.00127	8.1624	7.73382	9.21685	8.7939	9.03463
20.m00327_at	0.00217675	5.6945	TGME49_001260	transporter, putative	9.58625	9.60558	9.34517	9.1979	5.99298	7.10017	7.24972	7.35375	9.15604	8.53795	8.81257
20.m00348_at	0.00566142	2.2632	TGME49_002380	rab GDP dissociation inhibitor alpha, putative	7.87771	7.82646	8.39167	8.42515	6.89968	6.64477	7.31649	6.94661	8.01696	7.54361	8.14367
20.m00349_at	0.00240413	2.30829	TGME49_002370	TCP-1/cpn60 family chaperonin, putative	8.43588	8.31631	8.63703	8.61743	7.41162	7.18678	7.62666	6.95428	8.518	8.43588	8.52001
20.m00365_at	0.000521197	3.56427	TGME49_005510	nucleolar protein NOP5, putative	8.81394	8.75541	9.08246	9.15763	7.20312	6.8106	7.24742	7.21386	8.77518	7.79341	8.48232
20.m00368_at	0.00189601	4.65055	TGME49_005680	transmembrane domain-containing protein	10.976	10.9154	10.1292	10.8843	8.57032	8.08105	9.00748	8.37642	9.78582	9.67889	9.78354
20.m00379_at	0.00306915	3.60221	TGME49_005750	paired amphipathic helix protein sin3b-related	10.0088	10.107	9.54313	9.62543	7.93151	8.09516	8.49318	7.36899	9.71351	9.51238	9.37693
20.m00380_at	0.00196032	2.29687	TGME49_005670	SF-assemblin-related	11.0325	11.0452	10.9831	11.2014	9.75914	9.74851	10.2958	9.65996	10.6314	10.5565	10.614
20.m03698_at	0.00784569	2.68746	TGME49_002150	ABC1 domain-containing protein	8.33883	8.28762	7.83794	7.74448	6.51034	6.75001	7.1995	6.04404	7.67208	7.23369	7.82857
20.m03700_at	0.00176365	2.40703	TGME49_002190	hypothetical protein	7.00467	7.08838	7.26345	7.39954	5.58409	6.19976	5.95687	5.94631	6.80957	6.8105	6.8105
20.m03709_at	0.0053117	2.15467	TGME49_002300	inosine triphosphate pyrophosphatase, putative	7.87799	7.7148	7.58762	7.63306	6.32367	6.26819	6.73943	7.05233	7.35203	7.44508	7.44508
20.m03726_at	0.00599778	3.9062	TGME49_002530	aspartyl-tRNA synthetase, putative	7.65998	8.02618	8.33763	8.38037	5.39694	6.44443	6.84545	5.85429	7.76274	6.57499	7.62425
20.m03733_at	0.00470796	3.79883	TGME49_002620	hypothetical protein	10.1276	10.0261	10.1221	10.5294	7.87362	8.44341	9.06973	7.71624	9.79003	9.81474	9.74999
20.m03752_at	0.00941652	2.94453	TGME49_002910	zinc finger (CCCH type) protein, putative	8.33547	8.6505	7.85541	7.66889	6.02321	7.02006	6.93063	6.30421	7.56475	7.0136	7.38463
20.m03755_at	0.000529866	2.92085	TGME49_002940	hypothetical protein	7.64589	7.66111	7.61492	7.67755	5.96714	6.07153	6.45191	5.92333	6.98411	6.78224	7.07633
20.m03763_at	0.00720753	2.72103	TGME49_003040	hypothetical protein	9.04545	9.18595	9.19474	9.3512	8.5009	7.5174	7.76173	7.2207	8.63672	8.53973	8.63345
20.m03765_at	0.00219596	3.57801	TGME49_003060	conserved hypothetical protein	10.8503	10.9107	10.4485	10.6256	8.97164	8.70441	9.41645	8.38588	9.88178	9.84469	9.87033
20.m03798_at	0.00871811	3.02112	TGME49_003450	conserved hypothetical protein	8.64745	8.62115	9.0237	9.13828	6.94377	6.63599	8.01028	7.46021	8.69557	8.31935	8.65411
20.m03811_at	0.00111492	2.76103	TGME49_003620	hypothetical protein	6.43834	6.58632	6.83151	6.9572	5.01127	5.19698	5.4894	5.25491	6.16768	5.57416	6.11121
20.m03828_at	0.00588931	2.11051	TGME49_003870	isy1-like splicing family domain-containing protein	7.55898	7.39155	8.00868	7.75439	6.39665	6.33751	6.70999	6.95909	7.39049	6.90042	7.39049
20.m03884_at	0.00724235	2.90839	TGME49_005020	hypothetical protein	10.46	10.3886	9.99296	10.169	8.16001	8.56616	9.49337	8.63024	10.0852	9.9098	10.075
20.m03891_at	0.00627294	3.13617	TGME49_005170	hypothetical protein	10.1041	10.2182	9.81732	9.84113	8.60457	8.28745	8.92543	7.56726	10.051	9.77721	9.94794
20.m03893_at	0.000741224	6.74422	TGME49_005200	hypothetical protein	8.93846	9.27055	8.23353	8.44721	6.08261	5.97656	6.06246	5.7535	8.1168	7.89949	7.73088
20.m03913_at	0.0002362	3.60942	TGME49_005490	integral membrane protein, putative	8.57358	8.69813	8.52761	8.68932	6.62207	7.02867	6.76756	6.66327	8.0488	7.95071	7.98133
20.m03933_at	0.00548075	2.82127	TGME49_005730	hypothetical protein	7.69864	7.82442	8.02774	8.34442	6.60668	6.36338	7.01138	5.92841	7.43375	7.2248	7.51565
20.m03941_at	0.0030423	4.58211	TGME49_006310	cytochrome c oxidase assembly protein	7.5175	7.52093	6.94832	7.54501	5.69709	4.38352	5.47549	5.19162	6.44593	6.44593	6.35326
20.m03953_at	0.0097346	4.59614	TGME49_006450	hypothetical protein	7.75478	7.83672	7.94161	8.0146	4.62225	5.4447	5.80551	6.87356	7.96238	7.98351	7.72673
20.m03959_at	0.00646198	3.52969	TGME49_006540	hypothetical protein	9.90953	9.88769	9.58666	9.7097	8.1087	7.37171	8.82952	7.50548	9.39361	8.95213	9.25246
20.m03971_at	0.0029618	2.81936	TGME49_006630	hypothetical protein	7.14957	7.38679	6.90136	7.51578	5.55494	5.66196	5.51267	6.24247	6.83973	6.11469	6.22929
20.m03974_at	0.00359869	2.51335	TGME49_006670	hypothetical protein	9.00442	9.05768	8.85497	8.93585	7.45387	7.54867	8.2187	7.31324	9.06117	8.81638	8.77032
20.m03977_at	0.00210411	3.03825	TGME49_006710	conserved hypothetical protein	9.47081	9.51037	9.36684	9.41961	8.06648	7.39115	8.28874	7.60829	9.34874	8.89104	9.0837
20.m05892_at	0.00375843	2.97266	none	hypothetical protein	9.74904	9.88504	9.28196	9.52277	7.88753	8.25624	8.47882	7.52922	9.68365	9.30726	9.52023
20.m05894_at	0.000202363	3.30754	TGME49_002450	hypothetical protein	9.46777	9.29461	9.12782	9.21843	7.51132	7.48078	7.56733	7.64618	8.40191	8.43588	8.67958
20.m05902_at	0.00406809	3.83082	TGME49_005390	hypothetical protein	9.16087	9.23612	8.15331	9.03761	7.26064	6.85658	7.24567	6.47442	8.46262	7.81745	7.95147
20.m05912_at	0.00409154	2.02983	TGME49_004490	hypothetical protein	9.92328	10.1103	9.79236	9.73954	8.7786	8.50718	9.13896	9.0553	9.40449	9.38641	9.58934
20.m05937_at	0.0080841	2.36634	TGME49_004370	hypothetical protein	10.3432	10.1619	10.4903	10.4974	8.80881	9.17584	9.78574	8.75176	10.0748	9.84713	10.0049
20.m05982_at	0.00241369	2.55079	TGME49_003780	hypothetical protein	8.4343	8.48271	8.4304	8.67242	7.58995	7.2182	6.75045	7.05743	8.04128	7.93751	7.7392
20.m05986_at	0.000795339	2.43323	TGME49_006430	formin-related protein	7.7992	8.26846	8.08859	8.01078	6.89488	6.75314	6.81275	6.57476	7.48625	7.07405	7.48625
20.m05987_at	0.00426019	2.54746	TGME49_002970	hypothetical protein	11.7881	11.8411	11.4065	11.7172	10.1413	10.353	10.8888	9.97367	11.2162	11.2904	11.1049
20.m07349_at	0.00772364	3.04091	TGME49_002860	conserved hypothetical protein	10.224	10.3512	10.4739	10.439	7.89751	8.72072	9.19572	9.25617	10.4813	10.2174	10.2199
20.m07354_at	0.00214248	4.02795	TGME49_001730	conserved hypothetical protein	8.90144	8.64117	8.29536	8.21944	6.14166	6.22349	7.05829	6.5938	7.66833	7.75024	7.66747
20.m07361_at	0.00236234	4.43719	TGME49_003280	hypothetical protein	8.58412	8.40319	8.4964	8.59561	6.14856	6.4906	7.09664	5.74494	7.8671	7.44481	7.7076
239.m00011_at	0.00158776	4.58277	TGME49_102350	hypothetical protein	8.301	8.17149	9.17955	8.94973	6.22519	6.4802	6.5727	6.53881	9.24908	8.61543	9.03842
25.m00185_at	0.00600464	2.56876	TGME49_007690	double-stranded DNA-binding domain-containing protein	9.48502	9.24178	9.90441	9.80623	8.18947	8.04603	8.82208	7.93558	9.46265	8.97833	9.34944
25.m00186_at	0.00432509	2.90395	TGME49_007750	hypothetical protein	10.1072	9.95409	9.7032	9.72416	8.36147	8.03128	8.98666	7.9572	9.94937	9.97148	9.78275
25.m00204_at	0.00760281	3.67199	TGME49_009890	conserved hypothetical protein	10.0036	10.0872	9.96162	9.84314	8.8781	7.12411	8.34152	8.04561	9.72719	9.63474	9.70001
25.m00215_at	0.00698614	2.60488	TGME49_007940	split into 2 genes :007940 &00750: ribosomal protein S9 domain-containing protein; hypothetical protein	6.74232	6.68814	6.51326	6.20097	4.74965	5.39384	4.77331	5.70302	5.86822	5.48924	5.96108
25.m01736_at	0.00340726	2.87586	TGME49_007370	hypothetical protein	9.58826	9.74007	8.92219	9.33876	7.58995	8.06231	8.18739	7.65365	8.72415	8.35761	8.40845
25.m01737_at	0.00614367	2.3242	TGME49_007390	clathrin coat assembly protein-related	9.08476	9.0383	8.57272	8.50018	7.58995	7.70601	7.90616	7.12691	8.76004	8.29603	8.52863
25.m01740_at	0.00365568	2.49295	TGME49_007430	ATP-dependent helicase, putative / DEAD-box protein	8.03665	8.04504	7.94677	8.08437	7.02866	6.21007	7.05115	6.55152	7.37145	7.05658	7.23008
25.m01769_at	0.0097503	3.44898	TGME49_007680	S-phase kinase-associated protein, putative	9.05314	8.96056	9.00567	9.15551	7.2627	6.26819	8.11457	7.38475	9.08016	8.7299	9.03687
25.m01773_at	0.00792943	2.73675	TGME49_007720	nucleolar RNA-associated protein-related	9.89133	9.94389	9.1197	9.19675	8.28336	7.9717	8.47951	7.60725	9.58597	9.34679	9.4883
25.m01777_at	0.00708217	2.1056	TGME49_007760	DnaJ domain-containing protein	7.58995	7.69876	7.77894	7.63439	6.04073	7.00161	6.75045	6.61233	8.17155	7.52515	7.93156
25.m01780_at	0.00489011	2.84298	TGME49_007820	mitogen-activated protein kinase, putative	7.42802	7.67269	7.92645	7.65835	5.84219	6.08932	6.86005	5.86432	7.29577	6.61852	6.95221
25.m01782_at	0.00696639	3.46339	TGME49_007830	MORN repeat-containing protein	8.03603	8.2123	8.16517	8.49196	6.51034	6.96517	5.48303	6.77817	7.57595	7.14992	7.38319
25.m01787_at	0.00360612	2.93389	TGME49_007900	transcription factor IIIB subunit, putative	7.1205	7.25896	6.96049	7.21471	5.10975	5.60351	6.20821	5.42195	6.6502	6.19491	6.64312
25.m01796_at	0.00446926	4.53439	TGME49_008040	aldo/keto reductase family oxidoreductase	8.31116	8.4502	7.6472	7.49321	5.81403	5.79572	6.45911	5.10928	7.52144	7.00474	7.49069
25.m01800_at	0.00599778	3.3926	TGME49_008310	pinA, putative	8.48897	8.28845	7.95594	8.17869	6.17446	6.74308	7.15872	5.78622	7.73801	7.38189	7.73801
25.m01804_at	0.00183066	3.46504	TGME49_008370	myosin heavy chain, putative	10.4332	10.5334	10.2325	10.5213	8.2809	8.51424	9.24904	8.50466	9.92529	9.77773	9.83607
25.m01812_at	0.00388334	2.77301	TGME49_008490	hypothetical protein	7.97437	7.6378	7.92321	7.92473	6.69307	5.89327	6.83172	6.15624	7.4247	6.83444	7.3369
25.m01817_at	0.00181561	5.11304	TGME49_008550	hypothetical protein	9.87248	9.8784	9.66607	9.85471	6.62533	7.77732	7.87105	7.58124	9.22011	9.14519	9.22011
25.m01819_at	0.00432637	3.24286	TGME49_008570	hypothetical protein	7.98839	7.95691	7.93975	8.53326	5.96554	6.13797	7.05873	6.46701	8.58455	8.11784	8.4856
25.m01827_at	0.00468573	2.08222	TGME49_008790	mitochondrial carrier domain-containing protein	9.03395	9.10951	9.35461	9.45893	8.32071	8.24569	8.41174	7.74635	8.93452	8.67169	8.94951
25.m01837_at	0.00101816	3.62071	TGME49_009000	HECT-domain (ubiquitin-transferase) containing protein	7.57198	7.99496	8.15501	7.76944	5.86909	5.8447	6.42917	5.92333	7.51889	7.40108	7.45923
25.m01844_at	0.00308673	3.87509	TGME49_009070	hypothetical protein	9.43872	9.68074	9.71942	9.85786	8.35971	7.24606	7.99551	7.27853	9.15604	8.67207	9.00759
25.m01863_at	0.00111794	2.13304	TGME49_009420	hypothetical protein	9.4995	9.15882	9.38789	9.69248	8.37243	8.2652	8.37119	8.35824	9.25713	9.30866	9.19855
25.m01865_at	0.00823603	2.55839	TGME49_009440	hypothetical protein	7.83737	8.09578	7.87451	7.75683	6.87476	6.35038	7.04273	5.87568	7.70491	7.2599	7.67843
25.m01869_at	0.00563884	3.38419	TGME49_009490	hypothetical protein	8.40454	8.34573	7.81745	8.47253	5.78995	6.32453	6.98375	6.90678	7.49953	7.276	7.52476
25.m01875_at	0.00441742	3.00043	TGME49_009550	hypothetical protein	8.04525	8.13633	7.30131	7.33654	5.76494	6.24319	6.41641	6.05421	7.37847	6.57342	7.52562
25.m02928_at	0.00366576	6.58755	TGME49_007930	phosphatidylethanolamine-binding protein	9.70298	9.40835	9.34785	9.7803	5.73001	6.96894	7.70487	6.95671	9.15948	8.65981	8.95752
25.m02929_at	0.00624258	2.80777	TGME49_008320	polynucleotide kinase-3''''-phosphatase	9.46671	9.53631	9.03103	9.3185	7.20114	8.14299	8.34159	7.70912	8.76648	8.39585	8.76648
25.m02930_at	0.00640059	2.44737	TGME49_008340	conserved hypothetical protein	7.77613	8.10701	8.19041	8.14442	6.41367	6.94586	7.30792	6.38559	7.83497	7.63856	7.6874
25.m02931_at	0.00240413	5.50552	TGME49_008360	hypothetical protein	9.80625	10.0152	8.91874	9.24713	7.58995	6.90305	7.11182	6.53899	8.91686	8.86394	8.76888
25.m02937_at	0.0021528	2.84222	TGME49_008720	hypothetical protein	8.06994	8.42991	8.29266	8.28692	6.42275	6.47136	7.09664	7.0606	7.73797	7.40834	7.77378
25.m03618_x_at	0.00556715	2.47812	none	conserved hypothetical protein	8.26265	7.76407	7.70987	7.55018	6.62362	6.16323	6.95873	6.30421	7.86644	7.79345	7.96661
26.m00235_at	0.000436984	3.98778	TGME49_010270	lava lamp protein-related / peripheral golgi	8.29246	8.36763	8.12561	8.28969	6.40223	6.32864	6.48592	5.87626	7.96909	7.47857	7.65516
27.m00821_at	0.00287745	3.65514	TGME49_010750	phenylalanyl-tRNA synthetase-related protein	7.42671	7.43185	7.05297	7.39151	4.94268	6.15187	5.36671	5.36207	6.53528	5.99155	6.53528
27.m00836_at	0.000438816	3.57711	TGME49_011010	hypothetical protein	8.49058	8.54698	8.53695	8.50172	6.47486	6.73156	7.04187	6.47276	7.68038	7.29326	7.60759
27.m00853_at	0.00234423	3.69165	TGME49_011340	hypothetical protein	8.87157	8.93993	8.53149	8.54138	6.6795	6.26819	7.3001	7.09951	8.12232	7.63018	7.98613
27.m00862_at	0.00440526	3.17448	TGME49_011450	hypothetical protein	8.54616	8.50535	8.13336	8.13694	6.67837	7.37361	6.3102	6.29353	7.7863	7.70276	7.7863
27.m00863_at	0.000397438	3.64814	TGME49_011460	hypothetical protein	8.12197	8.19059	7.88946	7.88119	6.25563	6.37115	6.06445	5.92333	7.54824	7.09336	7.54824
27.m00873_at	0.00375286	2.11552	TGME49_011700	SAC3/GANP family protein	8.36211	8.22573	8.06874	7.79945	7.10629	6.67809	7.17401	7.17359	7.8345	7.75604	7.75604
27.m01232_at	0.00245699	2.13855	TGME49_011650	hypothetical protein	8.81639	8.68852	8.57634	8.9401	7.50739	7.37875	7.84574	7.90291	8.35107	7.99019	8.39672
27.m01468_at	0.0023247	2.5295	TGME49_011710	TB2/DP1, HVA22 domain-containing protein	10.8176	10.8718	10.6765	10.8319	9.78101	9.11622	9.74064	9.20449	10.3208	10.3235	10.4229
28.m00026_at	0.000994823	4.02937	TGME49_012250	XPG N-terminal domain-containing protein / MK	8.46907	8.49403	8.62415	8.74791	6.51034	6.36218	7.13083	6.28958	8.10725	7.64633	7.93083
28.m00283_at	0.000509022	3.56824	TGME49_011860	hypothetical protein	9.4329	9.47834	9.56105	9.47597	7.50578	7.72687	8.00578	7.36899	9.26366	9.07287	9.15257
28.m00290_at	0.00486005	2.92927	TGME49_012090	hypothetical protein	9.87433	9.85494	9.22105	9.40076	7.93145	7.57891	8.59073	8.04781	9.1327	9.0365	9.11401
28.m00433_at	0.00573911	4.10313	none	hypothetical protein	8.33693	8.22853	7.80169	8.50767	5.53418	5.90053	7.10897	6.18424	8.03458	7.31002	7.64041
31.m00001_at	0.00910453	2.46405	TGME49_012830	expressed protein JLP1	9.53676	9.30592	8.83327	8.64297	7.68335	7.54656	8.30336	7.5815	8.64297	8.52468	8.99208
31.m00861_at	0.00426019	2.716	TGME49_012920	hypothetical protein	10.1808	10.1429	9.97644	10.1329	8.51723	8.77682	9.23969	8.13339	9.91726	9.69017	9.84314
31.m00863_at	0.00371781	2.35457	TGME49_012950	ADP-ribosylation factor domain-containing protein	7.87341	7.78087	7.95518	7.96752	6.3625	7.1457	6.36035	6.76655	7.54704	7.25583	7.35043
31.m00865_at	0.00758991	4.3138	TGME49_012990	conserved hypothetical protein	9.64818	9.58484	8.78945	8.93633	6.6182	7.33353	8.04339	6.52785	8.90941	8.78413	8.78413
31.m00869_at	0.00375639	2.29472	TGME49_013030	hypothetical protein	9.22115	9.15861	9.40185	9.56564	7.96598	7.76375	8.45972	8.36452	9.15189	9.02052	9.02052
31.m00879_at	0.000218301	3.34565	TGME49_013450	dentin sialophosphoprotein-related	8.37444	8.18097	8.13491	8.11674	6.37903	6.55081	6.60167	6.3064	7.50875	6.91991	7.40178
31.m00882_at	0.00710791	3.17177	TGME49_013490	hypothetical protein	7.769	7.53497	7.93541	7.9174	6.99212	6.01365	5.95723	5.53263	6.93813	6.53365	7.11124
31.m00885_at	0.00495429	2.10488	TGME49_013590	hypothetical protein	10.6908	10.5431	10.8129	10.8784	9.74973	9.3267	10.0945	9.45926	10.3557	10.2419	10.3557
31.m00897_at	0.00470921	3.1894	TGME49_013970	NOL1/NOP2/sun family domain-containing protein	8.8654	8.82661	8.77837	8.8544	7.43065	6.7473	7.82373	6.62995	8.31754	8.15206	8.34247
31.m00931_at	0.00755616	2.61293	TGME49_013070	conserved hypothetical protein	9.69382	10.0004	9.62171	9.45192	7.58186	8.70723	8.45954	8.47658	9.4114	9.06249	9.26722
31.m01825_at	0.00308673	2.9487	TGME49_012760	hypothetical protein	9.22422	9.20019	8.68884	8.74217	6.9529	7.51958	7.80916	7.33347	8.79685	8.46536	8.86325
31.m01826_s_at	0.00101676	2.20341	NONE	conserved hypothetical protein	7.58951	7.75308	7.92326	7.89048	6.65029	6.41543	6.83237	6.69929	7.64231	7.47401	7.59848
33.m00003_at	0.0013906	2.73227	TGME49_014820	DNA repair enzyme, putative	9.76504	9.70852	9.60685	9.71037	8.56773	8.21927	8.38438	7.81898	9.09227	9.18183	9.03024
33.m01282_at	0.00198113	2.62204	TGME49_014410	conserved hypothetical protein	9.07	9.20119	8.5491	8.87383	7.27343	7.79173	7.4974	7.5688	8.16344	8.397	8.50188
33.m01284_at	0.00323756	2.58187	TGME49_014440	4'-phosphopantetheinyl transferase, putative	10.8919	10.8545	11.0566	11.3051	9.7049	9.17857	10.0348	9.71611	10.5503	10.4664	10.4264
33.m01285_at	0.00138949	3.06903	TGME49_014470	ulp1 protease family, C-terminal catalytic domain	7.60417	7.4263	7.29393	7.27816	5.49245	6.05053	6.0865	5.50197	6.84531	6.19095	7.07327
33.m01288_at	0.00407033	2.14541	TGME49_014500	protamine P1, putative	8.03157	8.03382	7.55544	7.69819	6.78135	7.05788	6.63939	6.43538	7.81025	7.46922	7.64373
33.m01298_at	0.00855268	2.87668	TGME49_014620	conserved hypothetical protein	8.91786	8.73852	8.42664	8.16393	6.69568	6.84844	7.82488	6.78034	8.4754	7.99491	8.48127
33.m01303_at	0.00508147	2.85051	TGME49_014770	ras-related protein, putative	9.70206	9.74543	9.88316	10.0565	8.65282	7.81454	8.86389	8.01099	9.83559	9.62405	9.76936
33.m01304_at	0.00857099	3.92137	TGME49_014780	nudix hydrolase domain-containing	9.09516	9.21663	8.44089	8.11233	6.35455	6.80977	7.58629	6.22897	8.94072	8.63983	8.87891
33.m01307_at	0.00993205	2.66072	TGME49_014810	hypothetical protein	7.37765	7.65119	7.55131	7.69506	6.35455	5.35663	6.15256	6.7642	6.9606	6.34964	6.56536
33.m01321_at	0.00187207	3.54742	TGME49_014930	conserved hypothetical protein	7.43262	7.36343	7.50257	7.26331	6.20514	5.17431	5.4235	5.45189	7.01393	6.68666	7.14261
33.m01323_at	0.00633168	2.20541	TGME49_014950	hypothetical protein	10.1815	10.1016	10.4632	10.719	9.03418	9.34362	9.61753	8.90585	10.098	10.0896	10.1611
33.m01341_at	0.0038699	2.21744	TGME49_015130	adapter-related protein complex, putative	8.75516	8.42565	8.90193	9.0913	7.78745	7.45714	7.89851	7.43535	8.7392	8.51848	8.74125
33.m01344_at	0.000224158	3.86014	TGME49_015160	hypothetical protein	8.49393	8.64512	8.84793	8.69555	6.86766	6.72506	6.52043	6.77477	7.94268	6.73332	7.8585
33.m01347_at	0.0013611	3.10733	TGME49_015210	F-box domain-containing protein	7.07537	7.16732	6.69889	7.29559	5.09092	5.34567	5.60303	5.65485	6.37649	5.72043	6.11616
33.m01349_at	0.00514101	2.33309	TGME49_015230	splicing factor U2AF-associated protein, related	7.98819	7.90651	7.83788	7.89046	6.18978	7.19679	6.79504	6.55245	7.73487	7.3613	7.26717
33.m01359_at	0.0093153	2.4318	TGME49_015350	hypothetical protein	9.798	9.75829	10.0206	9.99656	8.45592	8.63758	9.30385	8.04802	9.85914	9.6432	9.77058
33.m01360_at	0.00818702	3.42476	TGME49_015360	hypothetical protein	8.75891	8.74145	8.66552	9.40702	6.51563	7.62957	7.69305	6.63064	8.15339	8.01774	8.07301
33.m01396_at	0.00739628	2.87753	TGME49_015760	cytidine and deoxycytidylate deaminase zinc-b	7.80343	7.53139	7.47672	7.35551	5.23625	6.13296	6.59352	6.10499	7.12632	6.91924	7.01168
33.m02199_at	0.00402135	3.53676	TGME49_014270	translation initiation factor IF-2, putative	7.6411	7.78934	8.43891	8.02351	5.91655	6.15904	6.80526	5.72229	8.23332	7.06846	8.32648
33.m02202_at	0.00194722	2.42347	TGME49_015070	ferredoxin	7.46113	7.53014	7.11297	7.01602	6.18978	6.1485	5.91084	5.76285	6.765	6.58718	6.84035
33.m02203_at	0.00325733	2.36448	TGME49_015430	hypothetical protein	9.40734	9.4899	9.56737	9.30156	8.25426	8.46409	8.39742	7.68431	9.17522	8.87469	9.22624
33.m02213_at	0.00279808	2.63864	TGME49_014210	centromere/microtubule binding protein, putative	9.59913	9.58926	9.67126	9.73921	7.99998	8.04603	8.83355	8.12012	9.31744	9.05758	9.32507
33.m02669_at	0.00424029	3.40448	TGME49_014340	conserved hypothetical protein	8.64379	8.49892	8.45616	8.32586	6.8205	5.89282	7.15467	6.987	8.49975	8.0113	8.49351
33.m02683_at	0.0024409	4.24618	TGME49_014100	conserved hypothetical protein	10.2245	10.2864	9.92191	9.77673	7.83918	8.10479	8.57722	7.34364	9.37084	9.03148	9.27513
35.m00001_at	0.00454047	3.41022	TGME49_016790	ABC transporter, putative	8.38837	8.41979	8.75953	8.64002	6.78938	7.04605	7.30126	5.99156	8.47703	7.86604	8.26217
35.m00008_at	0.00199791	2.86833	TGME49_016390	RNA methyltransferase, putative	5.96845	6.03023	6.20183	6.35455	4.13268	4.92995	4.62191	4.78967	6.1583	4.74403	5.85536
35.m00013_at	0.00788011	3.43124	TGME49_016820	transmembrane domian-containing protein	11.4001	11.3224	10.9429	11.2845	8.65701	9.23869	10.2733	9.66604	10.744	10.6551	10.5356
35.m00014_at	0.00926795	2.36369	TGME49_016930	cholinephosphate cytidylyltransferase, putative	8.67397	8.67397	9.31041	9.21897	7.4102	7.62379	8.30266	7.5765	8.81036	8.55992	8.85553
35.m00015_at	0.00430719	2.09191	TGME49_016970	non-muscle myosin heavy chain-related	10.6073	10.6278	10.7057	10.8412	9.31501	9.44246	10.0744	9.69088	10.4258	10.3247	10.4735
35.m00023_at	0.00760281	2.66878	TGME49_016920	conserved hypothetical protein	7.79952	7.91302	8.61715	8.81376	6.68079	6.65618	6.98951	7.15224	7.7739	7.26687	7.72687
35.m00025_at	0.00163833	2.48953	TGME49_016890	conserved hypothetical protein	7.66133	7.54079	7.5392	7.34028	6.5193	6.36204	6.01342	5.92333	7.518	6.818	7.17401
35.m00035_at	0.00409818	3.0988	TGME49_016010	50S ribosomal protein L24, putative	8.25366	8.11407	8.01782	7.94269	5.78995	6.6093	7.01595	6.3862	7.54727	7.05619	7.38343
35.m00036_at	0.00871514	2.19469	TGME49_015890	trichohyalin, putative	8.46969	8.41501	8.13176	8.15044	6.88248	6.91674	7.80101	7.03062	7.72288	7.44772	7.36419
35.m00855_at	0.00150696	3.21067	TGME49_016040	ribosomal protein S15p-related	8.44846	8.23784	8.55661	8.63497	6.49354	6.49354	6.98309	7.17621	7.80009	7.38554	7.47154
35.m00897_at	0.00473826	4.21841	TGME49_016630	hypothetical protein	7.33605	7.00645	6.66459	6.53421	4.4365	4.73984	5.68827	4.36989	7.19739	6.39903	6.63603
35.m00903_at	0.00237676	5.99681	TGME49_016700	peptide deformylase, putative	8.18013	8.37286	8.18013	8.38387	5.79798	4.73229	6.36743	5.88251	8.32451	7.81745	8.25389
35.m00904_at	0.00379093	3.98789	TGME49_016710	hypothetical protein	9.3415	9.53011	8.38243	8.63046	6.8104	7.34176	6.65681	7.09302	7.96164	7.88108	7.18238
35.m00905_at	0.0037101	2.02853	TGME49_016720	hypothetical protein	11.4017	11.2639	10.9938	10.9856	9.80458	10.1592	10.3832	10.2163	10.9423	10.8035	10.9054
35.m00927_at	0.0055694	2.13409	TGME49_016950	pre-mRNA splicing factor RNA helicase, putative	8.39541	8.43974	8.17611	8.074	6.84409	7.51368	7.4462	6.90678	7.99006	7.83451	7.98099
35.m00936_at	0.00446926	2.77479	TGME49_017050	myb-like DNA-binding domain-containing protein	7.7441	7.57847	7.42321	7.32342	6.34229	5.99233	6.42388	5.42118	6.99863	6.23576	6.99863
35.m00939_at	0.00138957	2.26298	TGME49_017210	hypothetical protein	7.64837	7.65125	7.60424	7.63654	6.38301	6.26285	6.84545	6.33619	6.86706	6.50367	6.8249
35.m01594_at	0.00497213	2.3313	TGME49_016020	hypothetical protein	7.93569	7.76149	7.40382	7.23093	6.56434	6.6093	6.03628	6.23746	7.69947	7.04946	7.4151
37.m00009_at	0.00708217	2.52926	TGME49_017730	hypothetical protein	7.86041	7.74245	7.42636	7.34759	6.06581	5.76065	6.82815	6.36734	7.38954	7.17295	7.34759
37.m00735_at	0.0037101	3.371	TGME49_017340	hypothetical protein	7.43491	7.09918	7.25701	7.20263	5.83641	4.85486	6.01221	5.27754	6.78414	6.51178	6.56655
37.m00741_at	0.00053485	3.30062	TGME49_017430	protease inhibitor, putative	9.66584	9.66756	9.45613	9.56073	7.82645	7.67974	8.23546	7.71767	9.08938	8.92636	9.02507
37.m00750_at	0.00216285	3.19739	TGME49_017540	splicing factor, putative	8.53962	8.30846	8.36801	8.73542	6.2276	6.90495	7.07631	7.03508	7.74957	7.39148	7.81046
37.m00754_at	0.00952479	3.61229	TGME49_017580	DNA-directed RNA polymerases III, 39 kDa	9.5442	9.49409	9.50266	9.56981	8.15398	6.94118	8.52736	7.07658	9.43108	8.9184	9.40378
37.m00761_at	0.0036898	4.14354	TGME49_017640	hypothetical protein	9.97072	9.91067	9.17108	9.44088	6.99717	7.90174	8.09298	7.298	9.30782	8.72523	9.07275
37.m00765_at	0.00407033	4.30166	TGME49_017680	neurofilament triplet H protein-related	8.17567	8.42256	8.87353	9.04608	5.76633	6.90624	6.95293	6.47276	8.23478	7.56638	7.93925
37.m00776_at	0.00402125	3.02749	TGME49_017840	hypothetical protein	9.95475	10.067	9.45133	9.63213	8.22062	8.30836	8.59969	7.58405	9.25466	9.12091	9.25466
37.m00780_at	0.000416424	3.05634	TGME49_017870	zinc finger DHHC domain-containing protein	6.89801	7.01749	7.14911	7.09246	5.36503	5.31182	5.30875	5.72425	6.46833	6.08687	6.13086
37.m00784_at	0.00700509	2.1566	TGME49_017910	hypothetical protein	8.41317	8.31548	8.81852	8.74113	7.12882	7.35121	7.95277	7.42047	8.7411	8.41317	8.41317
38.m00004_at	0.00382877	2.2776	TGME49_018850	ribosomal protein S9p-related	9.15436	8.98357	9.29927	9.12679	7.81575	7.54456	8.36694	8.08666	9.19957	8.8146	9.19408
38.m00009_at	0.00314031	2.64427	TGME49_018420	pleiotropic regulator 1, putative	9.53261	9.67545	9.63453	9.63914	7.97118	8.26157	8.77977	7.85774	9.3838	9.15938	9.21218
38.m00014_at	0.00924839	2.4977	TGME49_018720	calcium-dependent protein kinase, putative	8.76483	8.86775	8.42445	8.88462	7.41322	7.39952	8.05074	6.79578	8.86482	8.60601	8.46007
38.m00016_at	0.00529145	4.42774	TGME49_019280	actin, putative	9.87685	10.025	10.1809	10.2125	7.49336	7.25121	8.92243	8.04188	9.60083	9.34269	9.61224
38.m01032_at	0.00927715	2.46378	TGME49_018610	ATPase (DUF699) domain-containing protein	9.44663	9.50902	9.20708	8.94051	7.58431	7.62619	8.6197	8.06954	8.81359	8.692	8.91269
38.m01053_at	0.00219236	3.96224	TGME49_018590	protein phosphatase 2C, putative	9.34061	9.40184	9.30277	9.2169	7.16294	6.92323	8.08872	7.14197	9.25316	8.75846	9.10539
38.m01055_at	0.00478711	2.70749	TGME49_018830	hypothetical protein	8.09961	8.04333	7.39127	7.28572	6.47033	6.38123	5.91634	6.30421	7.72569	6.71096	7.24718
38.m01072_at	0.00561602	2.29056	TGME49_019760	N-terminal acetyltransferase complex ARD1	9.73979	9.72791	9.6178	9.65158	8.4641	8.01361	9.04947	8.42711	9.66499	9.2458	9.5992
38.m01075_at	0.00468573	3.78323	TGME49_019810	hypothetical protein	10.5298	10.512	10.2077	10.2913	9.08316	8.54743	8.64592	7.58578	9.47231	9.52717	9.44414
38.m01080_at	0.00468573	2.54681	TGME49_018870	TBC domain-containing protein	9.75889	9.57825	9.47892	9.33061	8.14372	7.64056	8.6484	8.31921	9.36119	8.91853	9.25353
38.m01085_at	0.0061679	2.17653	TGME49_018760	NSF attachment protein-related	7.03614	7.09486	7.57988	7.79781	6.43284	6.06983	6.3966	6.12129	7.35143	7.1533	7.33331
38.m01086_at	0.00405166	2.76549	TGME49_018730	hypothetical protein	8.18975	8.13342	7.54622	7.65256	6.00177	6.83509	6.39095	6.42399	7.14928	6.65941	7.06334
38.m01098_at	0.00539887	2.25906	TGME49_019070	cAMP-dependent protein kinase regulatory subunit	8.49698	8.46355	9.12405	9.11143	7.49456	7.57992	7.91281	7.50583	8.35287	8.30624	8.32002
38.m01100_at	0.00114515	3.47583	TGME49_019130	glutathione reductase, putative	9.22042	9.28956	8.99767	9.04817	7.30739	7.49813	7.69227	6.86861	8.68618	8.60107	8.4838
38.m01101_at	0.00325801	3.22493	TGME49_019150	krr1 family, zinc finger-containing protein	7.76957	7.91374	7.49283	7.27379	5.59143	5.53179	6.32081	6.24882	7.00642	6.9879	7.00642
38.m01103_at	0.00977726	2.6087	TGME49_019230	acetoacetyl-CoA synthetase, putative	10.6266	10.6453	11.0539	11.2246	8.81584	9.73902	10.0066	9.45577	10.6866	10.6265	10.6265
38.m01895_at	0.00407997	2.08175	TGME49_018940	hypothetical protein	9.32996	9.30201	9.20464	9.06959	7.78651	8.37989	8.48272	8.02587	9.07811	9.04509	9.1838
38.m02365_at	0.00211695	5.00895	TGME49_018740	hypothetical protein	9.46923	9.33706	9.14764	9.44508	6.35455	6.83587	7.75273	7.15782	8.45373	8.27709	8.34932
38.m02529_at	0.0010461	3.22303	TGME49_018560	acetyl-coA carboxylase	7.66904	7.85323	7.56625	7.31211	5.55933	5.87313	6.05925	6.15525	6.98548	6.33375	6.91423
39.m00343_at	0.00404742	4.12046	TGME49_020170	hypothetical protein	9.27126	9.296	8.97918	8.85141	6.62664	6.56414	7.90624	7.12961	8.75599	8.40894	8.7572
39.m00346_at	0.00495016	4.16465	TGME49_020230	leucine rich repeat protein, putative	8.51413	8.3372	7.95191	7.67256	6.35455	6.08336	6.59213	5.21297	7.72169	6.53363	7.4688
39.m00356_at	0.00609161	2.31659	TGME49_020350	lysyl-tRNA synthetase-related	7.79814	7.74786	8.02795	7.73428	6.42075	7.23702	6.28477	6.51767	7.80417	7.27833	7.71722
39.m00367_at	0.00109506	8.45374	TGME49_020510	hypothetical protein	8.99307	9.16678	9.38461	9.45766	5.51742	6.82934	6.50957	5.82743	8.52829	8.29766	8.28171
39.m00622_at	0.00259586	3.00979	TGME49_020250	methylosome subunit pICln, putative	7.27978	7.30769	7.97497	7.72882	6.2226	5.87313	6.20821	5.62866	7.11308	6.82265	7.15272
41.m00005_at	0.000421358	3.27916	TGME49_022380	exportin 7, putative	8.36206	8.43512	8.479	8.3465	6.38922	6.71521	6.70158	6.96336	8.07267	7.94404	7.98975
41.m00016_at	0.0030416	2.79807	TGME49_021610	ubiquitin carboxyl-terminal hydrolase, putative	8.19895	8.28253	8.45723	8.67733	6.94853	6.64083	7.4462	6.64275	8.46604	7.68733	8.16824
41.m00024_at	0.0061048	2.38109	TGME49_022710	conserved hypothetical protein	10.3269	10.074	9.94038	9.8559	8.74042	8.83588	9.31138	8.30299	10.0849	9.91409	9.94633
41.m00029_at	0.0030416	2.6135	TGME49_023110	glycolipid transfer protein-related	10.2859	10.2917	10.8083	10.6325	8.76046	9.06938	9.5206	9.12412	9.51621	9.59048	9.72335
41.m00030_at	0.00961724	2.33156	TGME49_022840	serine/threonine protein phosphatase, putative	10.5193	10.298	10.4868	10.5065	8.97496	9.45706	9.82223	8.67112	10.2621	10.0733	10.1876
41.m00031_at	0.0083577	2.42028	TGME49_022210	SPFH domain / Band 7 family domain-containing	7.71762	7.63455	7.67391	7.74467	7.16376	6.15265	6.34788	6.00575	7.16376	6.49711	7.16376
41.m00032_at	0.00140975	2.35528	TGME49_022160	aldehyde dehydrogenase, putative	9.39364	9.36077	9.23623	9.26823	7.79408	8.06516	8.44102	8.01503	9.20398	8.76927	9.12333
41.m00033_at	0.00776617	2.34233	TGME49_022000	ribosome biogenesis protein Brix, putative	8.89116	8.54095	8.49378	8.4692	7.50178	7.12709	7.93583	6.91864	8.73008	8.58116	8.85906
41.m00037_at	0.00464687	2.80005	TGME49_021490	PUA domain-containing, cell cycle regulator p	10.0085	9.84799	9.80436	9.84127	8.12382	8.60345	8.97075	7.86228	9.90955	9.55641	9.78275
41.m00038_at	0.00375286	2.94239	TGME49_021360	beclin, putative / coiled-coil myosin-like BC	8.19313	8.06354	8.50045	8.40917	6.51034	7.23815	6.95294	6.23691	8.27117	7.71381	8.06354
41.m01266_at	0.00031224	4.65076	TGME49_020860	DEAD/DEAH box helicase, putative	8.89418	8.81184	8.97086	9.01606	6.78056	6.47541	7.0394	6.52771	8.3087	7.8734	8.06328
41.m01269_at	0.00489011	2.31412	TGME49_020890	hypothetical protein	11.3683	11.3545	10.9445	11.1294	9.82278	9.74448	10.5308	9.85675	11.2836	11.2313	11.0955
41.m01303_at	0.00464804	4.23573	TGME49_021540	hypothetical protein	9.1626	9.26883	8.06485	8.35327	6.78825	6.28542	7.0884	6.35703	7.81217	7.41313	7.81521
41.m01311_at	0.00310053	4.86509	TGME49_021630	ppg3, putative	7.77129	8.12496	8.11794	8.05013	5.11039	5.39384	6.6106	5.81962	7.50861	6.35192	7.78469
41.m01318_at	0.00253917	2.14819	TGME49_021690	hypothetical protein	7.62522	7.61993	7.61538	7.52148	6.42917	6.18651	6.44706	6.90678	7.33263	6.86861	7.21338
41.m01325_at	0.000421534	3.49975	TGME49_021910	split into 2 genes , other gene:TGME49_021900: awp1 protein, putative, AN1-like Zinc finger domain-containing protein	9.88227	9.72719	9.71492	9.86256	7.75096	8.11102	8.27109	7.82487	9.21593	8.91547	9.21593
41.m01332_at	0.00924468	2.71653	TGME49_022040	mog1 protein, putative	9.52273	9.39189	9.25938	9.30944	8.29363	7.53017	8.56669	7.32589	9.45332	8.75172	9.17992
41.m01333_at	0.00197007	2.57917	TGME49_022060	hypothetical protein	9.63327	9.54194	9.5649	9.69364	8.23171	7.90529	8.71145	8.11767	9.47597	9.35013	9.43376
41.m01337_at	0.00723093	3.94593	TGME49_022100	hypothetical protein	8.44268	8.99015	9.36276	9.682	7.4394	6.98375	7.70112	6.43186	8.82451	8.50754	8.52283
41.m01339_at	0.00951136	3.38356	TGME49_022130	conserved hypothetical protein	10.3892	10.2777	10.4469	10.3308	7.64597	8.85107	9.41862	8.49468	10.0802	9.9706	10.1259
41.m01366_at	0.00183921	2.81608	TGME49_022430	ubiquitin-protein ligase-related	7.00439	7.29299	6.89682	6.89249	5.26201	5.58593	5.95813	5.30587	6.72351	6.95835	6.33667
41.m01379_at	0.00736556	2.30588	TGME49_022950	14 kDa phosphohistidine phosphatase, putative	8.04611	8.30409	7.70818	7.84851	6.21565	7.00244	7.09469	6.77284	7.6506	7.49416	7.44617
41.m01381_at	0.00135774	2.72059	TGME49_022970	inositol monophosphatase, putative	10.6083	10.607	10.3869	10.5597	9.05318	8.81901	9.52885	8.98514	10.0807	10.004	10.0727
41.m01382_at	0.000909422	3.20576	TGME49_022990	ribosomal protein S18 domain protein	9.36052	9.3603	9.47333	9.43109	7.73095	7.49053	8.17974	7.50134	9.52018	9.30291	9.35581
41.m01384_at	0.00375892	4.82122	TGME49_023020	coproporphyrinogen oxidase, putative	9.37504	9.42012	9.68885	9.7544	7.41581	7.54171	7.89908	6.30421	9.07915	8.62339	9.05531
41.m02360_at	0.00109506	2.06558	TGME49_021310	aminopeptidase N, putative	4.9704	5.04753	4.79122	4.81452	4.01742	3.81091	3.98168	3.62745	3.94165	3.96056	3.86787
41.m02365_at	0.00841201	2.37953	TGME49_022930	fibronectin-related	9.99623	9.98852	9.51928	9.92213	7.94833	8.88828	8.94181	8.64504	9.6498	9.57232	9.48625
41.m02943_at	0.00560073	3.67469	TGME49_022180	hypothetical protein	11.0475	11.0158	10.7503	11.0297	9.26931	8.68054	9.92825	8.45474	10.7169	10.5362	10.6213
41.m02953_at	0.00316564	2.46384	TGME49_020880	hypothetical protein	10.289	10.2296	10.1627	10.2624	8.7176	9.02601	9.43237	8.56408	9.96018	9.8663	10.0191
41.m03142_at	0.000246025	2.36962	TGME49_021970	hypothetical protein	9.24746	9.18427	9.23532	9.17839	8.08778	7.79167	8.04688	7.94049	8.86888	8.61579	8.89573
41.m03144_at	0.00499552	2.76187	TGME49_021380	hypothetical protein	9.93759	9.97198	10.5798	10.3981	8.16669	9.02333	8.94277	8.89202	9.91518	9.72489	10.0071
42.m00006_at	0.00247683	3.33808	TGME49_028170	serine/threonine protein phosphatase, putative	8.75765	9.12393	8.94041	9.22923	6.77167	7.72946	7.08207	7.51194	8.59799	8.55251	8.41452
42.m00009_at	0.00684233	2.76827	TGME49_026400	lipoic acid synthase	7.3125	7.19739	7.39506	7.6506	5.14363	6.05743	6.17434	6.30421	7.59735	6.95006	7.19739
42.m00010_at	0.00176365	2.21168	TGME49_026550	conserved hypothetical protein	10.2738	9.93148	10.3287	10.2245	8.84451	9.31461	9.12117	8.89761	10.4401	10.1153	10.395
42.m00025_at	0.00606345	2.1636	TGME49_023930	RNA binding protein, putative	8.35801	8.2319	8.99935	8.31689	7.21415	7.57402	7.50947	7.15477	7.76288	7.64632	7.65189
42.m00042_at	0.00463338	2.29978	TGME49_025540	hypothetical protein	9.51427	9.40036	9.46997	9.74195	7.79672	8.56616	8.33187	8.62582	9.09922	8.8142	8.92341
42.m00048_at	0.000347733	2.51072	TGME49_025940	conserved hypothetical protein	10.331	10.3392	10.1625	10.4808	8.87921	8.98364	9.15029	8.988	10.0242	9.9181	9.9304
42.m00051_at	0.00303717	9.68648	TGME49_025790	hypothetical protein	11.073	11.1742	10.2867	10.6537	6.607	7.55957	8.67856	7.23851	9.91702	9.73973	9.5539
42.m00053_at	0.00516771	2.54936	TGME49_025580	26S Proteasome non-ATPase regulatory subunit	9.90664	9.86474	9.70287	9.77842	8.07062	8.22013	9.12159	8.4398	9.84081	9.60623	9.86305
42.m00055_at	0.00250683	2.42839	TGME49_025500	hypothetical protein	9.69862	9.75282	9.13401	9.40227	8.29874	8.34105	8.31669	7.91123	9.06413	8.97883	8.91379
42.m00060_at	0.00150762	3.3884	TGME49_025330	hypothetical protein	7.79051	7.98252	7.94768	8.08902	5.73208	6.05416	6.3478	6.63328	7.46002	6.87021	7.12725
42.m00063_at	0.00149043	2.10731	TGME49_025250	ribosomal protein L14p-related	8.88377	8.84782	8.94225	8.88018	7.68567	8.03957	7.99289	7.5343	8.79775	8.50285	8.89842
42.m00073_at	0.00824815	3.85258	TGME49_026560	zinc finger (CCCH type) protein, putative	9.5854	9.49975	9.4004	9.55102	7.35107	6.70096	8.59176	7.60948	9.23608	9.1095	9.1095
42.m00074_at	0.00335607	3.3658	TGME49_026520	hypothetical protein	10.068	9.94263	10.0126	10.244	8.11129	8.21977	9.05773	7.8746	9.64947	9.64947	9.64947
42.m00077_at	0.00473459	3.37142	TGME49_026420	oligoendopeptidase F, putative	10.0173	10.0864	10.2486	10.3895	7.97118	8.53179	9.20267	8.02261	9.86403	9.60679	9.77093
42.m00089_at	0.00109506	2.80434	TGME49_027060	hypothetical protein	7.61215	7.64513	7.3265	7.45344	5.78995	6.22031	6.29075	5.78556	7.2415	6.65941	7.14648
42.m00094_at	0.00997403	2.83023	TGME49_027570	transmembrane amino acid transporter domain	9.07157	8.85524	8.83592	8.80579	7.34131	7.33519	8.21856	6.66979	8.39594	7.96532	8.39983
42.m00096_at	0.00860605	2.2719	TGME49_027790	hypothetical protein	8.60508	8.47422	8.49789	8.27994	7.61242	7.02531	7.73024	6.75356	8.26009	8.07063	8.26009
42.m00102_at	0.00138949	2.73347	TGME49_028000	splicing factor 3A subunit 2, putative	10.1089	9.97953	10.1245	10.0808	8.39323	8.38278	9.06317	8.65149	9.73339	9.61618	9.91673
42.m00104_at	0.00260742	2.09982	TGME49_027560	hypothetical protein	9.97303	9.94129	9.99458	10.1304	9.15629	8.64213	9.21179	8.74807	9.64636	9.37571	9.54836
42.m00105_at	0.00379093	3.11157	TGME49_028400	hypothetical protein	8.94447	8.96702	8.65586	8.79519	7.15148	7.26835	7.80049	6.59166	8.52754	8.01464	8.32664
42.m00112_at	0.00149043	2.83588	TGME49_028390	hypothetical protein	7.42014	7.68132	6.92508	7.26546	5.98764	5.86866	5.74013	5.6804	6.80651	6.08907	6.80651
42.m00116_at	0.00362605	2.54042	TGME49_024900	adenylate kinase, putative	10.3395	10.2703	10.6741	10.6693	9.19122	9.3512	9.40683	8.62377	10.624	10.1913	10.5189
42.m00120_at	0.00556715	2.78724	TGME49_026740	zinc finger (C3HC4 RING finger) protein, putative	7.71693	7.53283	7.28195	7.03132	5.55933	5.51826	6.37926	6.19084	7.90368	7.24795	7.8867
42.m03278_at	0.00352011	3.21422	TGME49_023440	ATP-dependent RNA helicase, putative	7.68706	7.72221	7.50845	7.49699	5.34113	5.6555	6.29724	6.38296	6.9024	6.60031	6.8285
42.m03282_at	0.00170345	2.00437	none	hypothetical protein	10.4384	10.1838	10.6235	10.5449	9.44535	9.40114	9.64149	9.29008	10.3181	10.1621	10.3866
42.m03311_at	0.00600126	2.31628	TGME49_023830	ATP-citrate synthase, putative	6.46066	6.71077	6.84708	6.82401	5.89748	5.23064	5.07358	5.79358	6.56904	5.69295	6.38528
42.m03344_at	0.00338188	2.58725	TGME49_024260	PHD-finger domain-containing protein	7.375	7.76026	7.63131	7.83667	5.97982	5.98607	6.7285	6.42318	7.37532	6.99555	7.22058
42.m03350_at	0.00529461	2.2163	TGME49_024350	aminopeptidase N, putative	7.80751	8.0546	8.53177	8.57137	7.01427	7.20021	6.90872	7.24945	7.99033	7.91243	7.9909
42.m03359_at	0.00818702	2.66572	TGME49_024560	hypothetical protein	7.91042	8.38695	7.95535	7.80516	6.07678	7.02421	7.05404	6.24475	7.56454	7.02168	7.56454
42.m03379_at	0.000400247	5.4581	TGME49_024800	hypothetical protein	9.04352	9.08871	8.81151	9.07197	6.6078	6.26819	6.97561	6.37052	8.68549	8.28393	8.52732
42.m03395_at	0.003626	4.70608	TGME49_024970	NNP-1 protein-related	9.13651	9.25638	8.19237	8.31694	6.6927	5.9077	6.88694	6.47677	7.73726	7.72531	7.83307
42.m03398_at	0.00654336	3.21883	TGME49_025010	hypothetical protein	8.35629	8.50729	8.72832	8.77817	6.41504	7.38913	7.46818	6.35158	8.4159	7.81745	8.20449
42.m03451_at	0.00597436	3.24397	TGME49_025810	hypothetical protein	9.57723	9.58414	9.83635	9.93217	8.04161	7.2437	8.67958	8.17398	9.6697	9.35487	9.49936
42.m03452_at	0.00103837	2.06111	TGME49_025820	hypothetical protein	6.87746	6.72296	6.85563	7.12274	5.98951	5.66949	5.87097	5.87513	6.6034	6.65941	6.19786
42.m03453_at	0.00221086	2.65814	TGME49_025830	hypothetical protein	8.90046	9.01696	9.47306	9.37187	7.82615	7.41371	7.90495	7.97588	8.50285	8.35769	8.47303
42.m03455_at	0.00748285	3.14822	TGME49_025850	hypothetical protein	9.21738	9.15437	8.28738	8.47647	6.89906	7.14849	7.74838	6.72152	8.54963	8.15176	8.28389
42.m03461_at	0.00811402	2.93693	TGME49_025910	hypothetical protein	6.81425	6.67617	6.8004	7.10927	6.02948	4.65045	5.00598	5.49696	6.33797	6.29157	6.19797
42.m03471_at	0.00920408	3.95975	TGME49_026010	hypothetical protein	8.09387	7.64777	6.50999	6.75749	5.6045	5.01442	5.57044	4.87813	6.53403	6.17496	6.27133
42.m03483_at	0.0059704	2.29974	TGME49_026240	zinc finger protein, putative	8.69041	8.60015	8.27726	8.16824	7.26064	6.71739	7.42021	7.53193	8.30278	7.72878	8.16824
42.m03486_at	0.00550905	2.35629	TGME49_026280	conserved hypothetical protein	7.91406	7.74028	7.91488	8.0092	6.05082	6.78489	7.05276	6.74387	8.02554	7.13965	7.7111
42.m03487_at	0.00986086	2.53642	TGME49_026290	conserved hypothetical protein	9.36247	9.10479	9.30934	9.50645	7.37681	8.17309	8.64592	7.71606	9.29076	8.89104	9.25476
42.m03532_at	0.00426937	3.16504	TGME49_026810	SET domain-containing protein / Bromodomain	7.42194	7.57841	7.34383	7.13119	5.93691	5.53306	6.27249	5.084	7.01899	6.90608	7.01899
42.m03533_at	0.00682985	2.27416	TGME49_026830	oxygen-regulated protein-related / heat shock	8.4167	8.65311	9.07689	9.2186	7.88338	7.34176	7.85192	7.54691	8.51419	8.56285	8.50402
42.m03557_at	0.00496587	2.21934	TGME49_027270	hypothetical protein	7.58768	7.5958	7.15968	7.1713	5.78655	6.31813	6.28657	6.5227	7.1147	6.63087	7.12882
42.m03566_at	0.00360294	2.41301	TGME49_027380	hypothetical protein	10.05	10.2458	9.6501	9.66849	8.25616	8.67335	8.74539	8.85613	9.5437	9.34516	9.5437
42.m03570_at	0.000400247	3.87067	TGME49_027420	lytB domain-containing protein	8.74367	8.69643	8.42428	8.31336	6.48282	6.54021	6.84545	6.49891	8.17741	7.66398	8.00767
42.m03593_at	0.000603357	3.40294	TGME49_027930	hypothetical protein	8.99808	9.17736	8.99262	9.09318	7.38548	7.36021	7.55018	6.89825	8.6609	8.48175	8.28236
42.m03606_at	0.00664143	2.71807	TGME49_028140	phosphatidylcholine transfer protein-related	9.39924	9.47768	9.35801	9.41955	8.44132	7.28669	8.37453	7.78161	9.19034	8.8109	8.66964
42.m03638_at	0.00019602	3.84994	TGME49_028760	hypothetical protein	8.78324	8.70198	8.6677	8.56532	6.52205	6.86679	6.77187	6.77817	8.15488	7.64077	7.94548
42.m05835_at	0.00602398	3.50585	TGME49_024820	hypothetical protein	7.74961	7.4177	7.94931	8.13362	6.61561	5.30151	6.34221	5.75185	7.26159	7.01242	7.19113
42.m05836_at	0.00103837	5.49913	TGME49_024620	hypothetical protein	8.28511	8.50104	7.58988	7.89485	5.70623	5.84943	5.704	5.1744	7.43787	6.23569	6.93108
42.m05837_at	0.00793852	2.38775	TGME49_024730	hypothetical protein	9.27049	9.13064	8.82498	8.70777	7.42559	7.63452	8.36019	7.49099	8.65441	8.31713	8.65441
42.m07392_at	0.00510004	2.63037	TGME49_026260	hypothetical protein	8.77338	8.81997	8.29921	8.97068	6.81576	7.36846	7.7696	7.32836	8.34024	7.93349	8.18991
42.m07394_at	0.00412568	4.66657	none	hypothetical protein	10.0112	9.87679	8.75731	8.85141	7.16174	7.06247	6.84506	7.53796	7.63104	7.4752	7.9174
42.m07427_at	0.00842798	2.95877	TGME49_027940	hypothetical protein	9.65555	9.57089	8.77645	8.78199	7.25228	7.72794	8.18114	7.36353	8.54138	8.3654	8.51764
42.m07431_at	0.00518905	3.82845	TGME49_028200	hypothetical protein	7.05817	7.36343	7.33256	7.41355	6.05564	5.09284	5.70848	4.56369	6.47697	5.33502	6.25189
44.m00008_at	0.00171595	2.22175	TGME49_033450	GPI-anchored surface protein	11.4541	11.4685	11.0762	11.2405	9.95226	10.2348	10.4094	10.036	10.6323	10.4988	10.5475
44.m00023_at	0.00060885	2.69643	TGME49_030450	GMP synthase, putative	7.90542	7.83161	7.89306	7.87165	6.22878	6.26819	6.55477	6.72579	7.35516	7.01758	7.38662
44.m00029_at	0.00401374	2.72444	TGME49_031040	exosome complex exonuclease, putative	7.8486	7.8629	7.32317	7.24834	6.24731	5.64656	6.22461	6.38069	7.13699	6.50862	7.08028
44.m00048_at	0.00451804	2.03326	TGME49_032960	2OG-Fe(II) oxygenase family oxidoreductase	9.60919	9.70301	9.59492	9.40125	8.37203	8.40531	9.03141	8.40444	9.47838	9.0227	9.47522
44.m00049_at	0.00345658	3.1149	TGME49_033110	inosine-5'-monophosphate dehydrogenase, putative	7.18932	7.32628	7.33202	7.12308	5.48245	5.71725	6.19566	5.01859	6.63064	6.03606	6.63064
44.m00051_at	0.00325952	2.89824	TGME49_033100	prohibitin-related	8.62182	8.57396	9.3721	9.20935	7.62991	7.43531	7.4637	7.10759	8.6044	8.31854	8.56129
44.m02520_at	0.00104886	3.97365	TGME49_029030	conserved hypothetical protein	8.61213	8.47167	9.02068	9.06276	7.01899	6.41348	7.00541	6.76752	8.53338	7.70982	8.41661
44.m02527_at	0.00837634	3.10827	TGME49_029210	U2 small nuclear ribonucleoprotein, putative	9.39024	9.32154	9.27534	9.45153	6.7775	7.7998	8.02475	8.29217	9.17477	9.0236	9.24035
44.m02565_at	0.00325733	2.45611	TGME49_029930	p25-alpha domain-containing protein	12.6579	12.6519	12.0078	12.3617	10.9981	10.9968	11.4808	11.0181	11.9363	11.8736	11.8736
44.m02578_at	0.00232499	2.72371	TGME49_030100	hypothetical protein	9.08306	9.09081	9.19784	8.98705	7.6799	7.38659	8.1654	7.34457	8.74156	8.28086	8.82354
44.m02585_at	0.00543011	4.22847	TGME49_030190	hypothetical protein	8.46899	8.5176	8.2053	8.47156	5.30452	6.41616	6.98521	6.63701	7.89187	7.39701	7.64963
44.m02609_at	0.00169697	2.46347	TGME49_030630	hypothetical protein	9.33046	9.12997	8.71768	8.86677	7.67005	7.69299	7.92146	7.55762	8.23807	8.19999	8.40237
44.m02615_at	0.00323756	2.25488	TGME49_030710	ATPase, AAA family domain-containing protein	7.11745	7.28517	6.93687	7.14985	6.40921	5.78012	5.9183	5.6895	6.37646	6.67789	6.11658
44.m02616_at	0.00435697	4.6648	TGME49_030820	transmembrane domain-containing protein	9.36614	9.69572	10.2003	10.2118	7.66357	8.46598	7.01595	7.44123	9.47492	9.25874	9.25831
44.m02618_at	0.00466828	2.25788	TGME49_030850	mucin, putative	9.7938	9.84803	10.3096	10.5014	8.88961	8.75691	9.21443	8.89198	9.64824	9.3966	9.69469
44.m02632_at	0.00264783	2.58654	TGME49_031020	hypothetical protein	11.0764	11.0444	10.7193	10.8786	9.57228	9.72393	9.86759	9.07082	10.6195	10.5355	10.6253
44.m02639_at	0.00376787	2.02131	TGME49_031100	hypothetical protein	6.51504	6.80526	7.04776	7.2418	5.90881	5.87313	5.95498	5.81177	6.98429	6.43011	6.64899
44.m02641_at	0.00665478	2.15348	TGME49_031120	ribosomal protein S11, putative	9.15217	8.93489	8.99173	8.96214	8.12284	7.3274	7.91485	8.24916	8.8297	8.57437	8.73557
44.m02647_at	0.0070762	2.43518	TGME49_031190	arsenical pump-driving ATPase, putative	7.6486	7.83351	7.05366	7.11528	5.84532	5.92845	6.52963	6.21152	6.93186	5.79928	6.70383
44.m02663_at	0.00395417	2.49529	TGME49_031480	translational activator, putative	8.74119	8.91546	8.78675	8.68691	7.45582	6.9537	7.95884	7.48511	9.04968	8.62281	8.99996
44.m02693_at	0.00241369	4.64192	TGME49_032000	hypothetical protein	8.77781	8.94799	8.71656	9.20339	6.74677	6.87204	7.25083	5.91723	8.88661	8.45398	8.52776
44.m02716_at	0.00463338	2.94637	TGME49_032280	hypothetical protein	8.69263	8.61792	9.29202	9.58581	7.46111	7.56479	7.74838	7.17834	9.07726	8.82692	9.00302
44.m02739_at	0.00358719	2.17738	TGME49_032650	conserved hypothetical protein	8.2846	8.54558	7.82202	8.48195	7.23267	7.2058	6.98839	7.2169	8.37812	7.84452	8.02784
44.m02753_at	0.003756	2.16815	TGME49_032830	vacuolar proton-translocating ATPase subunit,	11.0418	11.094	10.7537	10.8229	9.87818	9.75865	10.1794	9.4303	10.9296	10.7293	10.9046
44.m02772_at	0.00896503	2.40087	TGME49_033170	conserved hypothetical protein	9.48726	9.54128	8.96828	9.12701	7.59927	7.90245	8.65027	7.91762	8.96677	8.81266	8.98347
44.m02774_at	0.00175394	4.24155	TGME49_033190	nuclear receptor coactivator NCoA-62-related	7.89939	7.96498	8.18456	8.21855	5.87528	5.40927	6.5751	6.06947	7.7546	7.34615	7.62117
44.m02775_at	0.00305839	2.33074	TGME49_033200	hypothetical protein	8.5405	8.23288	8.44268	8.35313	6.9024	7.12601	7.00506	7.65256	8.5299	8.13642	8.33048
44.m02780_at	0.00665129	2.67734	TGME49_033260	GTP-binding protein, putative	6.37609	6.41343	6.18162	6.21334	5.07123	4.42428	5.52974	4.47603	5.50859	5.40215	5.65439
44.m02784_at	0.00438358	2.8986	TGME49_033300	rhoGAP protein, putative	6.87924	6.73684	7.30289	7.43867	5.42429	5.53409	6.08336	5.17447	6.59284	6.03475	6.63586
44.m02794_at	0.00120802	4.27451	TGME49_033410	WD domain, G-beta repeat-containing protein	8.7062	8.7866	8.55842	8.62275	6.50334	6.04462	7.1097	6.63328	8.17569	7.93142	8.12356
44.m02808_at	0.00480823	2.09334	TGME49_033690	hypothetical protein	9.52605	9.29965	9.42321	9.57634	8.29172	7.98351	8.80351	8.48328	9.25316	9.09487	9.23804
44.m02824_at	0.00449626	3.07418	TGME49_033930	poly(A)-specific ribonuclease-related	7.29005	7.39379	6.78396	6.82805	5.78746	4.86226	5.80037	5.36495	6.25734	5.7686	6.28752
44.m04620_at	0.000283116	3.61572	TGME49_031460	hypothetical protein	7.93391	7.92696	7.65256	7.76957	5.86458	5.83734	6.19968	5.96426	7.03196	6.21793	7.03196
44.m04622_at	0.00860011	2.33536	TGME49_031760	hypothetical protein	8.12596	8.1205	7.82679	8.25473	6.51729	6.7317	7.54947	6.63493	7.46968	7.20973	7.59471
44.m04626_at	0.00913056	3.85682	none	hypothetical protein	8.49796	8.64854	7.90301	8.00695	7.21134	6.03702	6.52298	5.49547	7.65074	6.95299	7.65074
44.m04643_at	0.000299468	2.51696	TGME49_033080	tuftelin interacting protein 11-related	8.28066	8.4472	8.36827	8.23593	7.08969	6.84077	7.11237	6.96248	7.45231	7.61063	7.40955
44.m04677_s_at	0.00136749	2.64725	NONE	hypothetical protein	7.91979	8.06944	7.45017	7.6499	6.20292	6.37337	6.33117	6.56386	7.1307	6.65162	6.90063
44.m04686_at	0.00341792	2.76454	TGME49_029680	hypothetical protein	7.44057	7.3683	7.28353	7.33106	5.63282	5.69836	5.67322	6.55089	6.75045	6.38478	6.49297
44.m04690_at	0.00278189	2.89535	TGME49_029360	transaldolase, putative	9.79628	9.79628	10.3121	10.253	8.07509	8.54279	8.52017	8.88463	10.049	9.79628	9.89741
44.m04694_at	0.00308673	3.1309	TGME49_029000	kelch motif domain-containing protein	9.18172	9.23518	9.20128	9.55691	7.23267	7.29523	8.14016	7.9207	8.69422	8.52818	8.72213
44.m04695_at	0.0061539	5.64802	TGME49_029140	hypothetical protein	8.36752	8.21176	9.51683	9.66146	6.88534	5.96589	6.91882	5.99654	7.21425	7.12042	7.46722
46.m00012_at	0.00527649	3.26684	TGME49_035140	hypothetical protein	9.98756	9.84477	9.42893	9.72345	7.47999	7.72611	8.72896	8.21806	9.71773	9.39768	9.58808
46.m00022_at	0.00418769	2.38467	TGME49_037150	signal peptide peptidase domain-containing protein	9.88205	9.93717	10.0822	10.1004	8.76068	8.56616	9.28854	8.37126	9.84245	9.68326	9.77371
46.m00025_at	0.00762082	3.27919	TGME49_036620	hypothetical protein	9.9144	9.87678	9.18867	9.55839	7.10438	8.14726	8.48466	7.94857	9.10271	8.64788	8.87611
46.m00026_at	0.00217123	3.24906	TGME49_036640	zinc finger (C3HC4 RING finger) protein, putative	9.36976	9.28815	9.0815	9.30138	7.6083	7.34091	8.13878	7.15271	8.88661	8.72857	8.69645
46.m00029_at	0.00891922	2.49232	TGME49_036070	pyrroline-5-carboxylate reductase, putative	11.1144	10.9577	10.5997	10.7483	9.82283	9.33078	10.0541	8.94242	10.3322	10.3321	10.3356
46.m01606_at	0.00955158	2.31647	TGME49_034430	ATPase, AAA family domain-containing protein	5.39343	5.52949	4.50211	4.9356	3.66351	3.7249	4.01744	4.10708	4.22189	4.09966	4.11179
46.m01607_at	0.00657505	2.99944	TGME49_034440	aminotransferase, putative	10.0541	10.0528	9.56537	9.26919	7.8966	8.1153	8.80451	7.78629	9.60479	9.34381	9.64054
46.m01609_at	0.00261051	2.95644	TGME49_034470	hypothetical protein	9.13326	8.97758	9.19901	9.44159	7.58579	7.72687	8.0636	7.11973	8.91387	8.58283	8.79922
46.m01610_at	0.0093218	2.52081	TGME49_034490	hypothetical protein	8.95219	8.9368	8.19265	8.28873	7.77557	7.05994	7.31367	6.88563	8.31982	7.94602	8.40579
46.m01626_at	0.000998728	7.97866	TGME49_034950	hypothetical protein	9.52094	9.37343	8.36972	8.66704	5.75286	6.17768	6.21078	5.80522	8.80951	8.40268	8.40784
46.m01635_at	0.00405632	2.5457	TGME49_035160	hypothetical protein	8.95624	8.85955	8.96042	8.83007	7.04946	7.47974	8.09578	7.58907	8.68085	8.12599	8.52849
46.m01668_at	0.00316149	2.15759	TGME49_035700	sedoheptulose-1,7 bisphosphatase, putative	9.40594	9.16445	9.19233	9.10617	8.22062	7.88276	8.48452	7.8433	8.85779	8.67879	8.83371
46.m01681_at	0.00181842	2.98237	TGME49_035980	IBR domain-containing protein	9.43696	9.4783	8.93804	8.82843	7.32632	7.76608	7.56492	7.71858	8.77079	8.43066	8.62416
46.m01683_at	0.00232867	2.78185	TGME49_036010	prenylcysteine oxidase, putative	10.0726	10.0961	9.69869	9.98874	7.98625	8.61472	8.80385	8.54716	9.5522	9.51026	9.171
46.m01688_at	0.00171008	4.70347	TGME49_036110	autophagocytosis associated protein, putative	9.17726	9.34954	9.13313	9.42015	7.12882	6.44743	7.69305	6.87588	8.58662	7.95669	8.42242
46.m01717_at	0.00326548	3.55526	TGME49_036890	hypothetical protein	11.2812	11.0947	10.856	10.9795	8.67023	9.01778	9.8973	9.30627	10.6722	10.604	10.604
46.m01731_at	0.00538596	2.44521	TGME49_037070	hypothetical protein	10.3921	10.4641	10.2984	9.94576	8.84272	8.58806	9.52594	8.98374	9.87137	9.79699	9.97337
46.m01747_at	0.00241003	2.18135	TGME49_037280	TLD domain-containing protein	6.45493	6.44598	6.6984	6.5989	5.75336	5.16726	5.56049	5.21622	6.72745	6.38344	6.66822
46.m02884_at	0.00958031	2.73778	TGME49_036610	hypothetical protein	8.62022	8.79328	8.05568	8.25529	6.20999	7.3499	7.19589	7.15666	7.9525	7.77905	7.82034
46.m02889_at	0.00353985	2.19516	TGME49_037250	hypothetical protein	10.2318	10.2512	10.4041	10.4409	9.30877	8.91871	9.61906	8.94417	10.3483	10.166	10.342
46.m02897_at	0.000509022	2.65465	TGME49_034300	trichohyalin-related	6.74432	6.83735	6.95003	6.96543	5.22724	5.42787	5.52331	5.68463	6.34006	6.34006	6.28142
46.m02902_at	0.0029364	2.62618	TGME49_035400	conserved hypothetical protein	8.86143	8.80011	9.1442	9.0551	7.31485	7.31438	8.09578	7.56396	8.81743	8.66084	8.76888
46.m02914_at	0.000569652	2.20175	TGME49_036510	hypothetical protein	7.85331	7.89045	7.92184	7.95479	6.77381	6.51052	6.86766	6.91378	7.39256	7.1147	7.36804
46.m02915_at	0.00419782	2.31802	TGME49_037570	hypothetical protein	9.41096	9.39226	9.42879	9.3506	8.08153	8.39331	8.57907	7.67713	9.10906	9.009	8.89375
46.m02921_at	0.0084998	2.56546	TGME49_034180	hypothetical protein	10.9581	10.9353	10.4704	10.8069	8.78825	9.45584	10.034	9.45573	10.2957	10.2174	10.2732
46.m03658_at	0.00909269	2.56685	TGME49_037540	conserved hypothetical protein	8.35147	8.52942	8.0653	7.97483	6.25176	6.78303	7.48223	6.96401	8.09762	7.74227	7.70378
46.m03673_at	0.00259269	2.0715	none	hypothetical protein	5.28414	5.64844	5.19009	5.24941	4.60167	4.19632	4.18982	4.18159	5.79246	4.92773	5.31957
46.m03680_at	0.00793852	2.43648	TGME49_034940	hypothetical protein	10.5616	10.2559	10.3851	10.8113	8.83178	9.45706	9.74334	8.8425	10.3224	10.1445	10.1937
46.m03683_at	0.00607868	2.39786	TGME49_035720	hypothetical protein	8.05737	7.97952	8.17778	8.12554	6.65029	6.41742	7.47617	6.74934	6.99527	6.39468	7.46748
46.m03685_at	0.005295	2.0903	TGME49_036000	2Fe-2S iron-sulfur cluster binding domain	7.19964	7.08421	6.92267	7.40376	6.30386	5.65925	6.04419	6.34814	6.66318	6.14695	6.43966
46.m03702_at	0.0021528	2.39622	TGME49_036130	Signal recognition particle 9 kDa protein	8.95828	8.87493	8.56272	8.80456	7.65192	7.24162	7.87843	7.38548	8.62248	7.99983	8.53852
49.m00003_at	0.00232861	2.44708	TGME49_042070	cAMP-dependent protein kinase regulatory subunit	10.8511	10.8062	10.9056	11.1279	9.47597	9.55512	10.0958	9.39966	10.5667	10.4039	10.5668
49.m00010_at	0.00489771	2.88596	TGME49_038070	PKC-interacting cousin of thioredoxin, putative	7.83709	7.70347	8.10343	8.14576	6.49996	5.71481	6.69504	6.76372	8.23406	7.6889	8.03838
49.m00021_at	0.00621417	4.1084	TGME49_039690	hypothetical protein	9.09647	8.84301	8.6624	8.69107	6.83699	6.39408	7.78628	6.12129	8.70466	8.33957	8.84641
49.m00022_at	0.000994823	2.88992	TGME49_039720	ribosomal protein L24, putative	7.54252	7.49965	7.71587	7.62558	5.73358	6.39621	6.20044	5.92927	7.0217	6.7213	6.89463
49.m00028_at	0.00382332	2.35188	TGME49_039490	2-oxoisovalerate dehydrogenase, putative	9.33253	9.31128	9.74324	9.55241	7.82038	8.42143	8.58753	8.17486	9.4824	9.04943	9.27309
49.m00031_at	0.000538807	2.71071	TGME49_040640	casein kinase 1, putative	9.82962	9.76292	10.0021	10.0573	8.40352	8.30303	8.73168	8.45906	9.7206	9.26222	9.4835
49.m00035_at	0.00846313	3.13918	TGME49_040280	hypothetical protein	7.94093	8.05574	8.37337	8.43891	6.96004	6.15015	7.20582	5.89139	7.89367	7.47056	7.86436
49.m00041_at	0.00569971	3.80238	TGME49_043280	met-10 domain-containing protein	8.083	8.15772	7.61544	7.78131	5.74762	5.30713	6.84545	6.02966	7.15501	6.92484	7.07638
49.m00042_at	0.00163833	3.17466	TGME49_042850	hypothetical protein	9.70278	9.69361	9.59185	9.55325	7.68971	8.34228	8.26059	7.58249	9.34598	9.20505	9.28438
49.m00054_at	0.00133167	2.56133	TGME49_043930	hypothetical protein	8.26111	8.45002	8.46508	8.52685	7.03608	6.78928	6.99744	7.4527	7.91852	7.76656	7.87739
49.m00057_at	0.00430591	3.57981	TGME49_044310	developmentally regulated GTP-binding protein	7.21411	7.13734	7.67645	7.77437	6.07386	5.81422	5.67354	4.88112	7.26981	6.66773	7.24068
49.m00061_at	0.00307199	3.00083	TGME49_044650	translation initiation factor, putative	7.59471	7.46859	8.29769	8.1158	6.37338	5.94007	6.33031	6.49159	7.16399	6.7096	7.0624
49.m00062_at	0.00357834	2.12791	TGME49_044390	coatomer epsilon subunit, putative	8.56235	8.32079	8.8487	8.87019	7.54869	7.70392	7.72611	7.26557	8.56503	8.18076	8.46603
49.m00064_at	0.00150762	2.27457	TGME49_039400	hypothetical protein	8.56927	8.69612	8.35586	8.51655	7.07403	7.62008	7.43911	7.2622	8.33551	7.93947	8.4151
49.m00066_at	0.00149043	4.18304	TGME49_042660	vacuolar sorting protein 35, putative	8.87923	8.84098	9.07184	9.16475	6.44954	6.72273	7.49123	7.03508	8.55066	8.12285	8.39839
49.m00068_at	0.000800344	4.5796	TGME49_042730	guanylate kinase, putative	7.9205	7.86717	7.34104	7.30249	5.43338	5.39384	5.12007	5.70302	7.14928	7.08675	7.10088
49.m03089_at	0.00057154	2.37388	TGME49_038180	26S proteasome non-ATPase regulatory subunit,	7.99708	7.90213	8.12399	8.15772	7.02681	6.68731	6.81408	6.66373	7.73689	7.38942	7.73689
49.m03094_at	0.00212166	2.78106	TGME49_038230	serine/threonine protein phosphatase, putative	7.19353	7.03963	7.11177	7.06684	5.83835	5.85996	5.74615	5.06475	6.78363	6.21246	6.72592
49.m03123_at	0.00549129	3.32236	TGME49_039000	hypothetical protein	6.22703	7.22056	6.91344	6.76309	5.66179	4.8392	5.09962	4.59468	6.67617	5.45063	6.40311
49.m03155_at	0.00328515	3.43735	TGME49_039540	LEM3 (ligand-effect modulator 3) domain-containing protein	8.1463	8.22545	8.41639	8.35663	6.31688	5.96258	7.20254	6.53759	8.36664	8.0495	8.13176
49.m03158_at	0.00752602	2.67267	TGME49_039590	WD domain, G-beta repeat-containing protein	7.76957	7.7397	7.60664	7.49011	6.36641	5.68201	6.93063	5.95385	7.69344	7.32665	7.54977
49.m03159_at	0.00373909	5.90114	TGME49_039600	ROP8, putative	10.4815	10.6171	10.1504	10.2868	8.37583	7.23829	8.60028	7.07733	9.68966	9.36876	9.35547
49.m03164_at	0.00418339	3.38197	TGME49_039680	conserved hypothetical protein	8.20998	8.21943	8.20136	8.35681	7.12882	5.74718	6.58621	6.49391	7.44319	7.27883	7.30722
49.m03213_at	0.00469195	5.56421	TGME49_040460	malaria antigen, putative	8.48647	8.62973	8.90697	9.39373	7.26469	5.52085	6.60536	6.12129	8.28128	8.03419	8.05382
49.m03218_at	0.0030841	2.69107	TGME49_040560	microsomal glutathione S-transferase 3, putative	9.45071	9.46566	9.95133	10.0968	8.41147	8.16633	8.626	8.04802	9.64496	9.51756	9.59728
49.m03219_at	0.00752151	2.21176	TGME49_040570	hypothetical protein	9.49925	9.50587	9.82799	9.95055	8.317	8.35423	9.13108	8.40059	9.677	9.39502	9.66848
49.m03228_at	0.00441661	2.20778	TGME49_040670	ferredoxin, putative	10.0264	10.0262	9.88609	9.92795	8.57903	8.79112	9.36198	8.56408	10.246	9.91409	10.1917
49.m03233_at	0.000603357	3.31415	TGME49_040780	hypothetical protein	9.11903	8.97725	8.89298	8.79473	7.09402	6.92276	7.44362	7.40904	8.25474	8.18379	8.29015
49.m03236_at	0.000846033	3.62788	TGME49_040810	L-type amino acid transporter-related	6.4399	6.41506	6.4638	6.27343	4.97291	4.43691	4.59192	4.15395	5.70168	5.06123	5.8665
49.m03246_at	0.00341085	4.69605	TGME49_040950	ADP-ribosylation factor-related	9.00728	9.08178	7.83781	8.36132	6.53608	5.87313	6.64899	6.30421	8.15708	7.65172	7.92413
49.m03256_x_at	0.00583245	3.89652	TGME49_041190	hypothetical protein	8.27625	8.13476	8.06022	8.05279	5.15751	6.34865	6.7999	6.36922	8.11555	7.70459	7.84535
49.m03273_at	0.00292642	2.63671	TGME49_042080	vesicle transport v-SNARE, putative	11.0761	10.9336	10.8213	11.057	9.55428	9.3512	10.122	9.26556	10.2222	10.0347	10.2639
49.m03288_at	0.0029618	2.87217	TGME49_042380	elongation of very long chain fatty acids 4 protein	8.70559	8.93226	8.5047	8.29642	7.0756	7.2908	7.38162	6.60239	8.5895	8.14797	8.4678
49.m03302_at	0.00379093	4.51897	TGME49_042650	conserved hypothetical protein	9.78884	9.64882	8.96582	9.21354	7.78055	6.77657	7.65976	6.69615	8.88226	8.75156	8.76346
49.m03340_at	0.00413664	5.25994	TGME49_043350	gamma-glutamyl hydrolase, putative	9.24935	9.34525	9.0108	9.31789	6.49936	6.89789	7.86569	6.08016	8.71777	8.692	8.5164
49.m03355_at	0.00552787	2.60013	none	hypothetical protein	10.394	10.2429	10.5671	10.6537	8.78133	9.06826	9.73899	8.7547	10.5909	10.5341	10.5748
49.m03357_at	0.00592238	2.73967	TGME49_043580	HIT domain-containing protein	9.41076	9.48709	9.7441	9.77418	8.65701	7.98109	8.42991	7.5321	9.78572	9.58957	9.77693
49.m03361_at	0.00197007	2.69735	TGME49_043620	hypothetical protein	9.16409	8.89108	9.03667	9.15585	7.74761	7.48188	8.04225	7.24979	8.57272	8.38881	8.59006
49.m03383_at	0.00695278	2.69693	TGME49_044020	hypothetical protein	9.7134	9.51727	9.08906	9.08906	7.27403	8.01306	8.3174	8.07902	9.28547	9.10762	9.31649
49.m03393_at	0.00176365	2.29334	TGME49_044140	hypothetical protein	6.46846	6.61198	6.44593	6.27761	5.42684	4.98864	5.08059	5.51813	5.97854	5.94204	6.2565
49.m03398_at	0.003996	2.2905	TGME49_044240	hypothetical protein	8.3307	8.38064	8.03292	8.05124	7.2246	7.29943	6.9325	6.55634	7.6623	7.21168	7.66778
49.m03412_at	0.00330986	2.86122	TGME49_044470	viral A-type inclusion protein repeat family	7.30409	7.59912	7.87475	7.97937	5.68276	6.30711	6.22149	6.47944	7.50423	7.2199	7.20253
49.m03420_at	0.00240272	2.83294	TGME49_044540	mitochondrial carrier domain-containing protein	11.8567	11.93	11.4086	11.6366	10.1521	10.2583	10.6101	9.8022	11.0955	10.9369	11.0459
49.m05663_at	0.00191073	3.05224	TGME49_040060	hypothetical protein	10.1187	10.1691	9.62475	10.156	8.50863	7.94758	8.55134	8.62155	9.14749	9.0365	9.03533
49.m05672_at	0.00650182	2.06962	TGME49_040550	cytochrome C oxidase copper chaperone, putative	9.66978	9.75051	9.6378	9.65306	9.00144	8.75475	8.67921	8.07829	9.81889	9.64914	9.84269
49.m05681_at	0.00165261	4.30135	TGME49_040740	syntaxin binding protein, putative	6.82655	6.95643	6.67874	6.26819	4.23488	4.73482	5.07453	4.26652	5.7686	5.56282	5.7686
49.m05685_at	0.00108933	2.544	TGME49_041820	hypothetical protein	8.20576	8.18989	8.47388	8.41455	7.23818	6.69036	7.08565	6.8815	8.49705	7.84951	8.30702
49.m05694_at	0.00346692	2.58357	TGME49_042010	glucose inhibited division protein A, putative	6.39383	6.6542	6.73373	6.75167	4.80409	5.10138	5.65439	5.4961	6.17959	6.01224	5.98362
49.m05711_at	0.00149043	4.59742	TGME49_043210	hypothetical protein	7.87329	8.06791	7.77684	7.87892	5.04228	5.71996	6.22294	5.80848	7.49967	6.90682	7.07334
49.m05731_at	0.00409818	2.21409	TGME49_044520	UDP-N-acetylglucosamine-1-phosphate transferase	7.4625	7.29962	7.45186	7.18272	6.27735	5.89911	6.66119	5.97219	6.96905	6.11469	6.96905
49.m05734_at	0.00847605	2.60738	TGME49_044710	trichohyalin, putative	8.3716	8.49768	8.57186	8.58202	6.29313	7.31367	7.4749	7.41106	7.90269	7.65411	7.90269
49.m07206_at	0.000421534	3.09796	TGME49_039060	hypothetical protein	7.27816	7.0457	7.03422	6.99226	5.3779	5.33887	5.7468	5.36149	6.86356	6.67421	6.9097
49.m07213_at	0.00253475	2.0209	TGME49_038090	hypothetical protein	8.28114	7.82557	7.81328	7.97142	6.78541	6.826	7.10939	7.11062	7.56778	7.3304	7.5341
49.m07219_at	0.00171269	6.72818	TGME49_039120	hypothetical protein	9.71557	9.73113	8.39699	9.12744	6.54491	6.25864	6.74676	6.41997	7.96451	7.92611	7.49054
49.m07231_at	0.00432637	2.57734	TGME49_042280	hypothetical protein	8.24181	8.23591	8.53716	8.17097	6.65029	6.97037	7.50947	6.59219	8.38303	8.17097	8.52067
49.m07249_at	0.00580437	3.08124	TGME49_039630	cytidine and deoxycytidylate deaminase zinc-b	9.05893	8.92702	8.00015	8.38811	6.95572	6.66044	6.83995	7.42406	8.34053	7.85749	8.00015
49.m07252_at	0.0030841	2.20827	none	hypothetical protein	9.10666	9.18891	9.24204	9.3734	7.73668	7.89797	8.39142	8.31328	8.80498	8.2791	8.56477
50.m00005_at	0.00763873	2.75876	TGME49_047510	fructose-1,6-bisphosphatase, putative	9.87663	9.85998	9.92503	9.87299	8.86589	7.98516	8.9693	7.85822	10.104	10.0351	9.91826
50.m00007_at	0.00629872	2.94097	TGME49_048670	H+-translocating inorganic pyrophosphatase TV	9.35975	9.42149	9.6948	9.87632	7.68537	7.84213	8.81687	7.78282	9.60685	9.14519	9.23573
50.m00008_at	0.00060885	3.43944	TGME49_049670	cysteine proteinase, putative	7.30409	7.68392	7.71343	7.54366	5.90101	5.90707	5.87889	5.42945	6.80651	6.27068	6.71747
50.m00015_at	0.00955865	2.28022	TGME49_048400	lactoylglutathione lyase, putative	9.48793	9.37221	9.51369	9.61824	7.80705	8.3107	8.98281	8.13482	9.79002	9.49473	9.68695
50.m00019_at	0.000656979	3.6144	TGME49_051540	GRA9 protein, putative	9.52276	9.75191	9.53533	9.28041	7.89628	7.30371	7.79249	7.6829	8.81445	8.32575	8.57938
50.m00028_at	0.00597638	3.84605	TGME49_046580	hypothetical protein	7.88439	7.6623	8.24633	8.52204	5.46016	6.6093	6.67292	5.79918	7.76256	7.06029	7.53116
50.m00032_at	0.0029803	2.91554	TGME49_047020	conserved hypothetical protein	7.75913	7.81129	8.21778	8.32778	6.35455	6.17856	6.9811	6.42671	7.3818	7.3818	7.37853
50.m00033_at	0.00405166	2.17738	TGME49_047230	caltractin (centrin), putative.	9.21252	9.11692	9.29228	9.46121	8.34106	8.27569	8.32325	7.65256	9.19033	8.62439	9.32435
50.m00035_at	0.00330435	3.44384	TGME49_047470	nucleolar protein 5A, putative	9.74163	9.99429	9.50392	9.43327	8.24115	7.23702	8.23812	7.82074	9.63936	9.29619	9.68973
50.m00038_at	0.00301698	3.1092	TGME49_047670	ribulose-phosphate 3-epimerase	9.50994	9.46028	9.41063	9.24346	7.79303	7.16967	8.30163	7.81381	9.10772	8.59663	9.0945
50.m00046_at	0.00352011	4.59855	TGME49_048650	guanidine nucleotide exchange factor, putative	7.28969	7.12722	7.79341	7.64624	5.03449	4.77415	6.14055	5.10265	6.90195	6.75917	6.81617
50.m00056_at	0.0029364	2.66428	TGME49_047760	long chain acyl-CoA synthetase, putative	7.61222	7.49982	7.96461	7.98628	6.18724	6.26841	6.831	6.12129	7.45219	7.33848	7.29493
50.m00060_at	0.0094552	2.49774	TGME49_047220	nudix (nucleoside diphosphate linked moiety X)	10.3103	10.2248	10.1872	10.3403	8.20632	8.83857	9.29984	9.4353	10.3301	10.0794	10.1496
50.m00072_at	0.00317941	3.64562	TGME49_049390	NAD-specific glutamate dehydrogenase, putative	9.24515	9.06869	9.09098	9.1933	6.51034	7.28232	7.60568	7.73513	9.02258	8.6326	8.62176
50.m00085_at	0.00312141	2.15307	TGME49_051780	chaperone protein dnaK, putative / heat shock	8.87477	8.85781	9.39803	9.24389	7.90841	7.86333	8.26309	7.91408	8.75476	8.68089	8.75216
50.m00090_s_at	0.00358719	2.07777	TGME49_050930	hypothetical protein	9.78884	9.89186	9.774	9.75144	8.87778	8.44645	9.13566	8.52611	10.1001	9.97027	9.93938
50.m00094_at	0.00357999	2.72367	TGME49_048960	hypothetical protein	9.49033	9.23854	8.81331	8.72026	7.50995	7.63452	7.97399	7.36179	8.81525	8.4217	8.83901
50.m03074_at	0.00106606	3.28898	TGME49_045550	hypothetical protein	9.00528	9.07409	9.53207	9.6432	7.39314	7.59001	7.74838	7.65256	9.55044	9.16945	9.50359
50.m03091_at	0.00440526	2.31618	TGME49_046000	hypothetical protein	7.92244	7.54462	7.92359	7.91443	6.74372	6.09193	6.73005	6.89241	7.14972	7.11418	7.22918
50.m03094_at	0.00384455	2.3358	TGME49_046030	conserved hypothetical protein	6.92722	7.38319	6.67874	6.95636	5.55642	6.09036	5.84059	5.56248	6.3683	6.23151	6.03826
50.m03099_at	0.00755616	2.20055	TGME49_046080	hypothetical protein	7.39857	7.05714	7.51357	7.57295	6.5257	6.19934	6.54414	5.7216	6.90626	6.54299	6.90626
50.m03103_at	0.00293914	3.14697	TGME49_046130	serine protease inhibitor, putative	10.5917	10.5068	10.464	10.7302	8.4955	8.99742	9.53799	8.64594	10.4872	10.3356	10.4927
50.m03115_at	0.00172481	7.89682	TGME49_046510	serine/threonine protein phosphatase 2A B56 d	8.37929	8.44847	8.17374	8.3709	4.53257	6.26819	5.38043	5.26612	7.67195	7.3936	7.96215
50.m03125_at	0.00258345	2.60925	TGME49_046620	G10 protein homolog, putative	9.24005	9.14178	9.33967	9.32073	7.86673	8.02	8.25197	7.36899	9.2308	9.07889	9.19111
50.m03131_at	0.00880538	2.86817	TGME49_046710	hypothetical protein	7.98133	8.093	8.49986	8.64062	6.52175	6.32425	6.72785	7.56044	8.36113	7.98133	7.98133
50.m03132_at	0.0029618	4.93323	TGME49_046720	hypothetical protein	7.41504	7.30234	8.27553	8.36369	5.55933	5.10138	5.99783	5.48793	7.40352	7.18842	7.43496
50.m03167_at	0.00276132	2.43459	TGME49_047400	hypothetical protein	9.17085	9.15031	8.92671	9.42121	7.55975	7.8166	8.28899	7.86903	8.51367	8.22895	8.41122
50.m03169_at	0.00871811	2.93484	TGME49_047420	hypothetical protein	8.48965	8.6355	8.06782	7.9913	6.21808	6.6093	7.53248	6.61128	8.00641	7.65906	8.17658
50.m03187_at	0.00469663	2.56417	TGME49_047640	hypothetical protein	7.52184	7.62401	7.29097	7.58232	6.68594	5.7775	6.31563	5.80609	7.26116	6.5595	7.26116
50.m03198_at	0.00895049	2.56116	TGME49_047740	RNA methyltransferase, TrmA family, putative	8.60898	8.86506	8.03515	7.8087	6.97398	7.05359	7.26558	6.59755	7.71068	7.6	7.17774
50.m03201_at	0.000347733	4.1533	TGME49_047790	hypothetical protein	7.79817	8.14388	7.8386	7.85053	5.97316	5.68006	6.09285	5.66808	6.98109	6.55925	7.21212
50.m03206_at	0.00166297	4.37572	TGME49_048110	conserved hypothetical protein	8.55486	8.71008	8.18915	8.17257	5.79124	6.04981	6.54414	6.72339	7.66472	7.40818	7.64748
50.m03209_at	0.00679857	2.49003	TGME49_048140	hypothetical protein	8.36154	8.17026	7.85391	8.02104	6.17525	6.91124	6.79357	7.26204	7.32829	7.13845	7.18129
50.m03238_at	0.00909269	3.56111	TGME49_048490	hypothetical protein	9.96805	9.95714	10.0426	10.1112	8.56045	7.44319	9.07423	7.67187	10.0245	9.64811	9.84995
50.m03272_at	0.00191267	2.46603	TGME49_048990	hypothetical protein	11.3078	11.4022	11.4422	11.6256	9.93387	9.99368	10.5868	10.0547	10.9598	10.9354	10.8337
50.m03274_at	0.00755611	4.75137	TGME49_049010	hypothetical protein	8.05522	7.86571	7.75469	8.2761	6.19586	5.93802	6.34448	4.47999	7.24569	7.48174	7.25572
50.m03277_at	0.000390254	4.74573	TGME49_049030	endonuclease/exonuclease/phosphatase domain-c	8.77111	8.84851	8.34841	8.81823	6.39332	6.3249	6.34474	6.73678	7.91033	7.81389	7.57642
50.m03283_at	0.00155911	3.92548	TGME49_049200	ctr copper transporter domain-containing protein	7.46997	7.71075	8.21886	8.20224	6.24576	5.98904	5.88586	5.5897	7.24569	7.00079	7.26116
50.m03297_at	0.00240092	6.41117	TGME49_049380	zinc finger DHHC domain-containing protein	8.47121	8.36678	8.00593	8.37862	4.80384	5.77057	6.47949	5.44629	7.89534	6.82666	7.29493
50.m03305_at	0.0016435	4.62639	TGME49_049470	hypothetical protein	9.00798	8.88102	8.51847	8.49611	6.33354	7.08179	6.64106	6.00765	8.11861	7.81046	8.10604
50.m03320_at	0.000951872	2.44015	TGME49_049630	hypothetical protein	8.16894	7.83306	8.25442	8.38363	6.8394	6.75045	6.94472	6.95761	7.83306	7.58526	7.83306
50.m03347_at	0.00999047	2.54402	TGME49_049950	MAK16 protein, putative	9.12806	9.0385	8.83767	8.76905	7.76983	6.854	7.57645	8.18456	8.7039	8.49175	8.66236
50.m03350_at	0.00375406	3.48729	TGME49_049990	microtubule-binding protein, putative	11.3246	11.4212	11.2447	11.5541	9.73874	9.39611	10.2525	8.94885	10.6519	10.5832	10.5438
50.m03351_at	0.00205563	2.24954	TGME49_050010	sperm-associated antigen 4 protein-related	10.2516	10.2674	10.0764	9.84952	8.6503	9.0086	9.20274	8.9047	9.82059	9.45117	9.73958
50.m03352_at	0.000252836	2.81001	TGME49_050040	hypothetical protein	8.4216	8.42366	8.40176	8.51714	7.00376	6.85916	7.14588	6.79306	8.19546	7.72423	8.14062
50.m03362_at	0.00803766	2.61339	TGME49_050690	zinc finger (CCCH type) protein, putative	6.91894	7.0928	7.83664	7.93304	5.89028	5.9614	6.37653	6.00953	7.43303	6.9431	7.17946
50.m03387_s_at	0.00241003	4.43667	TGME49_051280	hypothetical protein	9.8696	10.2255	9.5796	9.95058	8.35353	7.23702	8.02088	7.41596	9.10275	8.70133	9.00593
50.m03419_at	0.00133235	2.2345	TGME49_051840	hypothetical protein	9.01677	8.97043	8.63512	9.0355	7.90508	7.75117	7.50947	7.85229	8.82584	8.33957	8.41338
50.m03425_at	0.00663944	2.94429	TGME49_051920	hypothetical protein	7.81018	8.05274	7.01981	7.22918	5.89451	6.08422	6.35185	5.54966	6.93898	6.01516	6.78463
50.m05614_at	0.00797694	2.56753	TGME49_046590	hypothetical protein	8.72257	8.60875	8.41129	8.69733	6.49114	7.63568	7.58077	7.29083	8.36681	7.80198	7.77317
50.m05639_at	0.00138949	2.12852	TGME49_048510	hypothetical protein	7.01529	7.31643	7.19489	6.925	6.25524	5.87313	6.04051	5.92333	6.42766	6.31993	6.80171
50.m05664_at	0.00225043	2.54756	TGME49_049610	nuclear cap binding protein, putative	7.62425	7.87952	8.14157	8.07485	6.69205	6.84298	6.58723	6.20145	7.43228	6.75577	7.39092
50.m05665_at	0.0049035	2.81975	TGME49_049970	hypothetical protein	11.0216	11.0132	10.1043	10.4428	8.92212	8.98065	9.4657	9.23123	10.4346	10.2665	10.4031
50.m05672_at	0.00104886	3.04019	none	hypothetical protein	8.37844	8.41182	8.24289	8.22109	6.41277	7.12723	6.76791	6.52968	8.15107	8.06966	8.4058
50.m05681_at	0.00423865	3.19734	TGME49_050740	yip1 domain-containing protein	8.2686	8.42954	8.20012	8.17091	6.05697	6.23677	7.20924	6.85869	7.67146	7.57214	7.63811
50.m05682_at	0.00564205	3.28699	TGME49_050840	hypothetical protein	9.32304	9.32762	9.362	9.36434	6.77592	7.72675	8.25654	7.75073	8.98557	8.66005	8.89644
50.m05690_s_at	0.00896103	5.21573	NONE	hypothetical protein	9.79811	9.66352	8.47882	8.98722	6.68844	6.24391	7.98425	6.47959	8.33986	8.17097	8.13251
50.m07091_at	0.00604852	2.14738	none	hypothetical protein	9.18403	9.38425	8.60206	8.79598	8.05756	7.8314	8.02663	7.64043	8.58199	8.58199	8.58199
50.m07095_x_at	0.00289871	2.84659	TGME49_048520	conserved hypothetical protein	8.29118	7.8902	8.13022	8.04376	6.52692	6.8975	6.86056	6.03344	8.12802	7.90279	8.32008
50.m07117_at	0.00479469	3.62406	TGME49_048280	hypothetical protein	11.4257	11.5524	11.1779	11.3115	8.86799	9.45706	10.3452	9.36679	10.4538	10.2323	10.4281
50.m07652_at	0.0099829	4.34255	TGME49_050120	hypothetical protein	9.71294	9.67029	9.0563	9.6376	7.13204	6.42745	8.48136	7.56212	8.83281	8.73762	8.50104
52.m00006_at	0.000621361	2.13871	TGME49_054650	RNA recognition motif zinc finger (CCCH type)	9.36231	9.28105	9.09089	9.11476	8.10081	8.06118	8.30184	7.99822	8.92421	8.58413	8.8869
52.m00012_at	0.00776617	2.45991	TGME49_052220	protein antigen, putative	7.80069	7.70347	8.26429	8.17352	6.44179	7.22558	6.84162	6.23854	7.77597	7.41811	7.66137
52.m00017_at	0.00162404	3.24194	TGME49_053640	hypothetical protein	7.34821	7.14844	7.49078	7.95576	5.60126	5.6242	6.00698	5.92333	6.87894	6.95298	6.49297
52.m00026_at	0.000283116	2.28094	TGME49_054470	hypothetical protein	9.48771	9.63174	9.54417	9.7435	8.37165	8.36449	8.52899	8.38348	9.57155	9.2891	9.36192
52.m00031_at	0.00237463	3.82024	TGME49_054870	hypothetical protein	9.87748	9.95166	9.74194	10.3786	7.91333	8.10289	8.63112	7.56773	9.65446	9.10864	9.47164
52.m01529_at	0.00489011	2.22112	TGME49_052200	zinc finger DHHC domain-containing protein	8.39368	8.39899	8.7675	8.74828	7.27398	7.16879	7.92003	7.34053	8.66292	8.26807	8.56115
52.m01540_at	0.0012188	2.6727	TGME49_052320	nuclear DNA-binding protein, putative	9.2523	9.20984	8.97502	8.87017	7.54186	7.44319	8.00164	7.64744	9.05229	8.18227	8.98359
52.m01549_at	0.00155029	2.11614	TGME49_052490	vacuolar protein sorting 29, putative	8.52191	8.53397	8.48318	8.52722	7.50775	7.12577	7.38162	7.7254	7.998	8.0439	8.01562
52.m01550_at	0.00705967	2.99457	TGME49_052510	hypothetical protein	10.4578	10.2552	9.90833	9.98546	7.74415	8.76475	8.9552	8.81321	9.78854	9.4348	9.66612
52.m01551_at	0.000347733	6.30502	TGME49_052520	hypothetical protein	8.03144	8.17045	8.11536	8.33159	5.51189	5.24528	5.95687	5.30878	7.69728	7.0119	7.41528
52.m01563_at	0.00437441	2.47868	TGME49_053090	ATP-dependent RNA helicase, putative	8.27429	8.21661	8.00659	7.99324	6.65029	7.31416	6.93373	6.35425	7.72377	7.2248	7.96326
52.m01577_at	0.00752151	3.28779	TGME49_053320	hypothetical protein	8.62929	8.74412	7.83357	7.94747	6.39509	7.26039	6.52291	6.10759	7.82427	7.18002	7.66042
52.m01582_at	0.00717237	2.21361	TGME49_053370	hypothetical protein	8.48381	8.80475	9.17592	9.17191	7.57242	7.78419	8.17174	7.52244	8.56176	8.06966	8.45068
52.m01590_at	0.00582096	3.28096	TGME49_053470	hypothetical protein	8.73926	8.59092	8.99282	9.33748	6.75717	7.14729	7.95884	6.94072	8.95825	8.50285	8.65322
52.m01623_at	0.008135	3.55347	TGME49_053950	XAP5 protein, putative	8.16184	8.0535	7.81539	7.77466	5.90259	5.24038	6.89819	6.44733	7.49075	6.99599	7.45744
52.m01636_at	0.00207655	2.96839	TGME49_054140	DNA-directed RNA polymerases I, II, and III 7	10.1138	10.0661	9.5264	9.55331	8.09128	8.46286	8.45452	7.97223	9.74422	9.53221	9.78887
52.m01650_at	0.00807462	2.357	TGME49_054400	50S ribosomal protein l2, putative	6.75615	7.08352	6.73822	6.97809	6.27958	5.18497	5.44058	5.70302	6.04583	6.00105	6.13293
52.m01672_at	0.00124199	2.10081	TGME49_054710	hypothetical protein	9.60218	9.56012	9.59438	9.64979	8.4472	8.48604	8.8594	8.33006	9.3858	9.36081	9.38337
52.m01691_at	0.00378188	4.75149	TGME49_054940	hypothetical protein	7.61857	7.86301	8.08278	8.09672	4.82996	6.02104	6.36267	5.45388	7.55014	6.96472	7.35263
52.m02681_at	0.00179445	2.33025	TGME49_052630	hypothetical protein	10.0013	9.79564	10.0795	10.0569	8.67401	8.72042	9.14609	8.51089	10.096	9.68616	10.0308
52.m02690_at	0.00219236	2.05441	TGME49_053830	hypothetical protein	10.893	10.7297	10.659	10.7223	9.79969	9.36841	9.70581	9.9753	10.444	10.2682	10.5834
52.m02717_at	0.00172776	2.24451	TGME49_054670	hypothetical protein	8.81489	8.91813	9.06167	8.92899	7.3912	7.8154	8.01141	7.84005	8.5646	7.92734	8.4713
52.m03467_at	0.00274029	2.56604	TGME49_054240	conserved hypothetical protein	9.03999	8.89963	8.70855	8.50336	7.12135	7.37177	7.85074	7.3695	8.73049	8.43195	8.83839
52.m03468_at	0.000745965	2.50708	TGME49_054270	hypothetical protein	6.87956	7.09314	6.88961	7.31566	5.79114	5.61826	5.61525	5.84928	6.74502	6.0096	6.46382
540.m00199_at	0.00706677	6.07986	TGME49_104670	internalin, putative	7.85872	7.91142	9.05613	9.68501	6.14724	5.39745	6.49023	6.06021	9.22577	8.82673	9.09475
540.m00203_at	0.00561293	6.47358	TGME49_104740	protein kinase-related	8.42218	8.4584	8.0821	8.31492	4.38197	6.47912	6.25523	5.38302	7.64609	7.18343	7.20367
540.m00205_at	0.00762539	4.0766	TGME49_104760	collagen alpha 1(III)-related	6.54756	6.96496	7.04943	7.24514	4.67035	4.08261	5.85807	5.08659	6.25713	5.64903	6.23227
540.m00331_at	0.00988839	2.50509	TGME49_104490	hypothetical protein	8.10861	8.15606	7.56813	7.63485	6.52816	6.33932	7.2085	6.09221	7.3674	7.10564	7.35467
540.m00334_at	0.0057939	3.42431	TGME49_104460	zinc finger (C3HC4 RING finger) protein, putative	8.36517	8.35207	8.23867	8.36601	5.98085	6.3402	7.47182	6.4258	8.02554	7.23318	7.85424
541.m00136_at	0.0033945	3.29883	TGME49_105940	peptidyl-prolyl cis-trans isomerase, putative	7.44736	7.42388	6.72098	7.01304	5.60103	4.85611	5.72523	5.53507	6.40275	5.84839	6.40275
541.m01141_at	0.00255344	3.45511	TGME49_104880	hypothetical protein	9.82848	9.95167	9.30056	9.67996	8.03707	7.7485	8.38658	7.43359	9.1733	8.93814	9.08971
541.m01157_at	0.00649361	4.68447	TGME49_105140	patatin-like phospholipase domain-containing protein	8.01829	8.08881	8.44702	8.53294	4.91542	6.04348	6.60033	6.6163	7.7969	7.00679	7.77317
541.m01166_at	0.00552604	3.7961	TGME49_105270	hypothetical protein	8.81823	8.91483	9.53714	9.65281	7.32575	6.74317	8.03279	7.12323	8.99778	8.55168	8.78499
541.m01176_at	0.00771702	2.83149	TGME49_105470	hypothetical protein	6.05894	5.92258	5.32266	5.52311	4.09977	3.7513	4.89771	4.07227	5.06478	5.03172	5.06478
541.m01181_at	0.00287745	3.79618	TGME49_105540	hypothetical protein	8.01443	8.01341	7.79205	8.00072	6.07104	5.51696	6.76853	5.7659	7.8778	7.06548	7.58098
541.m01200_at	0.0007469	2.42545	TGME49_105900	hypothetical protein	9.27202	9.23132	9.04955	8.92084	7.97562	7.65549	7.97569	7.75393	8.37369	8.23771	8.52381
541.m01203_at	0.00449626	4.64979	TGME49_105930	hypothetical protein	9.39126	9.25412	7.93574	8.47626	6.74155	6.15565	6.78775	6.50376	7.47081	7.06855	7.47081
541.m01211_at	0.00328515	2.67102	TGME49_106040	zinc finger (CHY type) protein, putative	8.72456	8.63441	8.76275	8.4537	6.79455	7.44319	7.67505	6.99306	8.27566	7.68798	8.1599
541.m01222_at	0.00743347	2.23695	TGME49_106250	hypothetical protein	7.87686	8.02037	7.72197	7.75773	6.46771	7.30809	6.32397	6.63104	7.37191	7.36644	7.17945
541.m01224_at	0.00216285	3.47702	TGME49_106280	hypothetical protein	9.2505	9.09682	9.7913	9.85859	7.6637	7.63452	8.08361	7.42396	9.2759	8.85983	9.17414
541.m01225_at	0.00466747	4.03273	TGME49_106290	DNA-directed RNA polymerase III largest subunit	8.48132	8.7927	8.35887	8.2653	6.51491	6.44328	7.23096	5.662	8.31497	7.95457	8.11405
541.m01238_at	0.00322583	4.62975	none	hypothetical protein	9.11176	8.99416	8.35327	8.33551	6.78636	6.24934	7.02957	5.88569	8.4423	8.55669	8.12359
541.m01241_at	0.000848917	3.18715	TGME49_106490	hypothetical protein	8.6894	8.75333	9.17794	9.33291	7.36108	7.31116	7.26878	7.3235	8.13062	8.16858	8.0968
541.m01246_at	0.00931342	3.59716	TGME49_106590	hypothetical protein	9.15186	8.94431	8.68373	8.59609	6.02613	6.83286	7.63683	7.49273	8.301	8.06783	8.36969
542.m00219_at	0.00330435	3.17921	TGME49_106920	hypothetical protein	8.43891	8.6505	8.70339	9.11368	7.20957	7.37228	7.20654	6.44343	7.94018	7.85965	7.92545
542.m00226_at	0.00304849	2.44275	TGME49_107020	conserved hypothetical protein	8.42764	8.41366	8.85732	8.98258	7.41581	7.23702	7.70416	7.17016	8.14016	8.03268	8.08298
547.m00082_at	0.00447077	4.85056	TGME49_107570	glycerol-3-phosphate dehydrogenase, putative	8.16713	8.30412	8.44802	8.5512	5.48867	6.8946	6.54548	5.42912	8.07025	7.50148	7.97843
55.m00007_at	0.00177136	2.19483	TGME49_056760	pyruvate kinase, putative	9.89745	10.1081	9.97118	10.1503	8.96683	8.7062	9.22397	8.6936	9.74721	9.56818	9.66502
55.m00011_at	0.00400514	3.06025	TGME49_059550	hydroxymethyldihydropterin pyrophosphokinase-	7.92357	8.0608	8.38404	8.23804	6.43684	5.96253	7.11366	6.63882	8.23594	7.76656	8.13578
55.m00068_at	0.00425648	2.25996	TGME49_057510	aminoalcoholphosphotransferase, putative	5.96108	6.02673	6.39131	6.57063	5.25554	5.2662	4.73509	4.98773	6.15988	6.05247	5.96108
55.m00081_at	0.00245699	2.50398	TGME49_058150	proteasome subunit alpha type 7, putative	7.9899	7.91321	8.50273	8.58474	6.78056	6.89286	7.02688	6.99338	7.98858	7.69978	8.06474
55.m00103_at	0.00669619	2.98172	TGME49_058870	hypothetical protein	9.92981	9.93723	9.20708	9.59483	7.84658	8.44498	8.54852	7.52429	10.3322	9.89644	10.0424
55.m00106_at	0.00776617	2.78398	TGME49_058930	peptidyl-prolyl cis-trans isomerase NIMA	8.24248	8.05057	8.35256	8.36716	6.75703	6.96116	7.37289	6.01307	8.33644	7.90786	8.19355
55.m00133_at	0.00784788	2.67845	TGME49_060200	ATP-dependent RNA helicase, putative	8.17484	8.07045	7.508	7.46713	6.76289	6.07216	6.74736	5.95242	7.90462	7.46713	7.50092
55.m00157_at	0.00101676	2.42174	TGME49_061400	hypothetical protein	9.38715	9.37432	9.26687	9.31232	8.43566	7.9626	7.89593	7.9423	9.02394	9.01459	8.82664
55.m00161_at	0.000603357	2.0447	TGME49_061620	hypothetical protein	8.4692	8.72817	8.46875	8.6555	7.60357	7.3861	7.5862	7.61817	8.50285	8.36257	8.46141
55.m00173_at	0.00270756	3.158	TGME49_062130	hypothetical protein	7.86409	7.59309	7.80579	8.02302	6.36399	6.47956	6.28036	5.52603	7.8878	7.46557	7.46557
55.m00175_at	0.000973163	2.62686	TGME49_062380	elongation factor Tu, putative	7.72097	7.69305	7.92954	8.09552	6.44508	6.18796	6.6274	6.60529	7.55314	7.39684	7.65972
55.m00178_at	0.00754626	4.30759	TGME49_062450	hypothetical protein	7.91033	8.03195	8.20421	8.18936	6.05464	6.00812	6.92194	4.92362	7.81877	7.2437	7.78722
55.m00203_at	0.00385211	3.2924	TGME49_063710	sterol O-acyltransferase, putative	8.56366	8.37578	7.55718	7.62913	6.33361	6.23822	6.5618	6.11556	7.87669	6.97314	7.81695
55.m00227_s_at	0.00911607	3.16101	NONE	hypothetical protein	10.8756	10.7918	9.92898	10.31	8.42178	8.48907	9.58895	8.76506	10.2325	10.0411	10.112
55.m00236_at	0.0030841	2.39167	TGME49_062960	hypothetical protein	8.48996	8.34563	8.4338	8.62067	6.85851	7.0748	7.68853	7.23614	8.02553	7.98549	8.01312
55.m00250_at	0.000336549	3.89687	TGME49_061440	armadillo/beta-catenin-like repeat-containing	10.0029	9.9631	9.77466	10.0917	7.9324	7.72741	8.15423	8.16903	9.57567	9.26898	9.52466
55.m00252_at	0.00258343	2.28856	TGME49_061210	26S proteasome non-ATPase regulatory subunit,	9.28482	9.19483	9.39511	9.34502	8.12647	8.34135	8.32164	7.65256	9.26548	8.88509	9.19337
55.m04602_at	0.000634286	2.27558	TGME49_055220	hypothetical protein	8.38974	8.57053	8.30661	8.49963	7.50442	7.17849	7.15739	7.18126	7.9981	7.99549	7.77317
55.m04627_at	0.00308673	2.44426	TGME49_055660	calmodulin-related protein	11.4115	11.3977	11.3804	11.4223	10.3288	9.86435	10.5327	9.72853	11.1616	11.0767	11.0576
55.m04631_at	0.00241003	3.1117	TGME49_055740	hypothetical protein	9.80772	9.85782	9.3341	9.36635	7.86831	7.69643	8.46268	7.78777	9.17794	9.06249	9.06249
55.m04649_at	0.00216285	2.71588	TGME49_056770	ATP-dependent helicase, putaive	10.5025	10.4899	10.7809	10.8463	8.99272	9.18212	9.68899	8.99018	10.3882	10.2215	10.2727
55.m04670_at	0.00155111	3.01624	TGME49_057040	polyposis locus protein 1-related	8.52117	8.41003	8.12473	8.57544	7.22665	6.48755	6.84545	6.70073	8.38892	8.09611	8.11288
55.m04677_at	0.00581167	3.39461	TGME49_057120	glucose transporter-related	7.68153	7.62558	8.24996	8.34024	5.75056	5.87313	6.89903	6.32161	7.55211	7.08548	7.41581
55.m04695_at	0.005295	4.31478	TGME49_057450	SCO1/SenC domain-containing protein	8.43938	8.61498	7.75511	8.24028	6.74244	5.65587	6.6775	5.53679	7.97401	7.48133	7.75093
55.m04701_at	0.000594365	2.59795	TGME49_057520	synaptobrevin-like protein, putative	8.98879	8.93132	9.15282	9.31737	7.924	7.57774	7.69341	7.68568	8.65432	8.35016	8.65432
55.m04716_at	0.00760486	5.0334	TGME49_057720	P-type ATPase domain-containing protein	8.21049	8.10246	7.23093	7.27313	5.80183	4.58321	6.20532	4.90052	7.52308	7.18842	7.19336
55.m04729_at	0.00870865	3.8893	TGME49_057990	heat shock protein, putative	9.70281	9.80168	9.08531	9.3766	6.8378	7.89137	8.39678	7.0024	9.16682	8.997	9.12604
55.m04741_at	0.00375286	2.26471	TGME49_058110	N-acetylglucosaminylphosphatidylinositol deacetylase	7.39893	7.04409	7.11276	7.16176	5.77614	5.92325	5.80464	6.49621	7.42956	7.04409	7.08817
55.m04748_at	0.00183399	4.01956	TGME49_058230	serine/threonine-protein kinase-related	8.07746	8.18163	8.73877	8.84215	6.78571	6.64913	6.25574	6.12129	7.42956	7.50332	7.5555
55.m04768_at	0.0057147	2.35311	TGME49_058540	hypothetical protein	11.6906	11.9233	11.5713	11.7455	10.0168	10.4791	11.0448	10.4516	11.0448	10.9178	11.0194
55.m04772_at	0.00173912	2.42463	TGME49_058610	RNA recognition motif-containing protein	9.86097	10.1286	9.6201	9.81579	8.84285	8.28344	8.58269	8.6054	9.56914	9.3981	9.40431
55.m04779_at	0.000846033	2.79326	TGME49_058680	TATA-box binding protein, putative	7.58392	7.56501	7.87714	7.8773	6.12294	6.43674	6.41983	5.99606	7.03193	6.61064	6.92898
55.m04788_at	0.00133967	2.87662	TGME49_058800	rhoptry protein-related / protein kinase-related	8.96474	9.27365	9.51505	9.66582	7.83373	7.81454	8.01336	7.66014	9.13232	9.27459	9.00638
55.m04807_at	0.00949846	2.61979	TGME49_059000	hypothetical protein	9.17906	9.3084	8.73855	8.83864	8.37215	7.3568	7.58893	7.18897	8.78737	8.56693	8.79719
55.m04808_at	0.0042508	4.5459	TGME49_059010	vacuoloar ATP synthase subunit D, putative	8.14681	8.20641	8.40243	8.60844	6.91285	5.35446	6.48989	5.86863	7.78486	7.58116	7.78486
55.m04811_at	0.00793755	5.39808	TGME49_059080	hypothetical protein	8.87381	8.97575	8.10962	8.41136	7.04286	5.301	6.79845	5.49845	8.04071	7.77551	7.84424
55.m04820_at	0.00162257	2.7734	TGME49_059210	hypothetical protein	7.84168	7.91269	7.88448	8.09698	6.25282	6.35231	6.95092	6.29316	7.46093	6.79233	7.41504
55.m04830_at	0.00561558	2.1559	TGME49_059520	hypothetical protein	8.96917	8.84809	9.28345	9.08289	7.94808	7.73491	8.4301	7.63735	9.09738	8.98592	8.90804
55.m04836_at	0.00106606	2.14107	TGME49_059640	nucleoporin, putative	8.64898	8.90095	8.70885	8.6321	7.58995	7.37148	7.79815	7.73797	8.76455	8.3615	8.6321
55.m04838_at	0.00848765	2.58889	TGME49_059660	orotate phosphoribosyltransferase, putative	8.53693	8.49524	9.04497	8.96603	6.9024	7.35573	8.05501	7.24068	8.74677	8.4932	8.81513
55.m04845_at	0.000602929	2.13239	TGME49_059720	conserved hypothetical protein	7.01533	7.01563	6.77896	6.86635	5.8055	5.67852	5.81011	6.01226	6.63064	6.09474	6.5312
55.m04846_at	0.000303724	2.36208	TGME49_059850	conserved hypothetical protein	7.04983	7.03695	6.91492	7.12261	5.8227	5.61303	5.90394	5.82442	6.67874	6.02824	6.67874
55.m04848_at	0.0031529	2.69766	TGME49_059880	hypothetical protein	10.9036	10.9526	10.832	10.9746	9.54256	9.02949	10.03	9.33391	10.8027	10.6379	10.5618
55.m04855_at	0.00682985	2.41967	TGME49_059990	SAC3/GANP domain-containing protein	8.17106	7.85016	8.13176	7.92217	6.09091	6.78274	7.1527	6.94955	7.69917	7.54361	7.67037
55.m04858_at	0.00480793	2.24829	TGME49_060020	hypothetical protein	7.81652	7.72037	7.48442	7.61415	5.97376	6.75045	6.77931	6.45663	7.41581	7.27807	7.39959
55.m04891_at	0.00445649	2.54666	TGME49_060510	ubiquitin thiolesterase protein, putative	8.34178	8.51646	8.09354	8.37416	6.51034	6.9146	7.51771	6.98887	8.07881	7.85214	8.17858
55.m04892_at	0.00615871	2.57624	TGME49_060520	hypothetical protein	6.6638	6.79601	7.10436	7.13403	4.91315	5.61323	5.78628	5.92446	6.58959	6.21571	6.51609
55.m04894_at	0.00464626	2.02631	TGME49_060550	N-acetlytransferase-related	7.10175	7.27245	6.90883	7.46488	6.188	6.26802	5.81733	6.39914	6.33535	6.23576	6.02858
55.m04903_at	0.0050635	2.63678	TGME49_060660	ribosomal protein L23, putative	7.9368	7.59699	7.53925	7.28315	6.00177	5.81497	6.75424	6.19011	7.72699	7.49793	7.78549
55.m04919_at	0.00489011	2.64647	TGME49_061080	hypothetical protein	7.76427	8.08038	8.27947	8.02604	6.42234	6.60999	7.24742	6.25412	7.68864	7.27847	7.75571
55.m04923_at	0.000506704	2.77198	TGME49_061220	transcription initiation protein, putative	10.1563	10.0349	10.0257	10.0765	8.40567	8.438	8.85795	8.70811	9.83346	9.73624	9.92154
55.m04926_at	0.00385211	2.57239	TGME49_061250	histone H2A, putative	10.1518	10.2726	9.92567	9.40752	8.49887	8.50718	8.87563	8.42355	9.18282	9.38338	9.50225
55.m04929_at	0.00891922	2.54054	TGME49_061380	ribosomal protein S8p-related	10.38	10.2712	10.0786	10.0535	9.30623	8.4514	9.32026	8.32492	10.4191	10.0789	10.2573
55.m04934_at	0.0021528	2.93282	TGME49_061460	structure specific recognition protein, putative	9.88298	9.87642	9.69184	9.70678	8.36856	8.06866	8.71233	7.79933	9.43171	9.31871	9.62325
55.m04935_at	0.00375286	3.26905	TGME49_061480	phosphatidylserine synthase, putative	7.55005	7.80621	7.75558	7.81251	6.51034	5.65611	6.42977	5.49265	7.1899	6.47358	7.03208
55.m04968_at	0.00891322	2.40273	TGME49_062010	calmodulin, putative	10.5849	10.2873	10.9458	11.0194	9.27209	9.27042	10.0438	9.19243	10.7469	10.475	10.8154
55.m04970_at	0.000998507	2.10123	TGME49_062040	eukaryotic translation initiation factor 3 subunit	9.16057	9.09499	9.32681	9.27156	8.34617	7.96025	8.25675	8.00582	9.52981	9.45117	9.64611
55.m04978_at	0.00672747	2.46908	TGME49_062150	kelch motif domain-containing protein	8.00238	7.9283	8.32006	8.14155	7.00595	6.25234	7.31649	6.60162	8.00708	7.57119	7.9283
55.m04981_at	0.00517633	2.12402	TGME49_062170	hypothetical protein	9.0086	9.03074	9.21137	9.17985	8.09402	7.74125	8.51093	7.73717	8.83642	8.70248	8.99776
55.m04992_at	0.00758991	2.76159	TGME49_062460	PX domain-containing protein	7.36198	7.19739	6.93629	7.3148	6.35083	5.47156	6.00345	5.12261	6.69646	6.65074	6.45993
55.m04995_at	0.00745397	3.55273	TGME49_062490	hypothetical protein	7.12288	7.12288	8.2455	8.12934	5.29451	6.08399	6.06543	5.86097	7.12288	6.71594	7.5555
55.m04998_at	0.0098143	2.38622	TGME49_062530	hypothetical protein	7.40936	7.22858	6.75353	6.95298	5.61722	5.59528	5.60311	6.50993	6.48245	6.24127	6.53719
55.m05002_at	0.00440239	4.04575	TGME49_062610	hypothetical protein	9.00683	9.01739	8.15777	8.2113	7.04635	6.66097	6.69052	5.92983	8.30126	7.97517	8.16864
55.m05019_at	0.000421534	3.55072	TGME49_062910	NADH-cytochrome B5 reductase, putative	9.37728	9.47294	9.30253	9.23702	7.31907	7.34604	7.57801	7.83421	9.06934	8.56462	8.9726
55.m05020_at	0.00464626	2.81009	TGME49_062920	trypsin, putative	8.6586	8.88014	8.98585	9.06059	7.74981	7.48224	7.6735	6.71716	8.75346	8.64333	8.64333
55.m05027_at	0.00053485	3.94679	TGME49_063030	dynein light chain, putative	7.52468	7.20866	7.14743	7.61492	5.37972	5.10138	5.48303	5.60885	6.54656	5.56461	6.54656
55.m05034_at	0.00604158	2.75809	TGME49_063100	hypothetical protein	8.17947	7.93964	8.7654	8.63343	6.61932	7.45671	6.87158	6.71565	8.10057	7.88191	7.93964
55.m05040_at	0.0049035	3.65042	TGME49_063150	hypothetical protein	8.92853	8.73872	8.48429	8.45388	6.47328	6.21364	6.84545	7.6008	8.53029	8.135	8.41144
55.m05048_at	0.00173599	2.97573	TGME49_063260	L-type amino acid transporter-related	6.09257	6.48313	6.42208	6.44064	4.71445	4.8913	4.36785	5.17183	5.84275	5.57015	5.60765
55.m05059_at	0.00499552	3.3747	TGME49_063420	ubiquitin carboxyl-terminal hydrolase, putative	8.63217	8.4472	8.75272	8.5946	7.11451	6.10931	7.49641	6.68743	8.68116	8.24607	8.46698
55.m05062_at	0.00173763	2.2251	TGME49_063470	ubiquitin carboxyl-terminal hydrolase isozyme	7.92218	8.17461	8.02673	7.73297	6.91367	6.56467	6.72174	7.04094	7.23287	6.7198	7.44283
55.m05069_at	0.00183092	6.51137	TGME49_063560	hypothetical protein	9.84325	9.79959	9.5931	9.86112	6.94081	6.88147	8.00578	6.45715	9.31879	9.19014	9.26355
55.m05071_at	0.00361538	2.3702	TGME49_063580	26S proteasome non-ATPase regulatory subunit-	8.90775	8.94846	8.38277	8.71432	7.25325	7.23702	7.74199	7.74099	8.94073	8.56786	8.57082
55.m05072_at	0.0038349	2.72467	TGME49_063590	hypothetical protein	8.93924	8.94673	8.33409	8.81474	7.0755	7.5087	6.95632	7.70995	8.40324	8.30173	8.35086
55.m05073_at	0.000401542	3.39796	TGME49_063600	RNA-binding protein, putative	8.10562	8.1243	8.42103	8.42027	6.3181	6.42224	6.71276	6.55944	7.82761	7.66296	7.83626
55.m05075_at	0.00155422	5.41388	TGME49_063650	pre-mRNA splicing factor RNA helicase, putative	8.97513	9.14078	8.6321	8.72026	6.41924	6.11871	7.16305	6.02062	8.59981	7.93684	8.40286
55.m05080_at	0.00121759	2.45623	TGME49_063690	hypothetical protein	9.81554	9.91307	9.59942	9.67511	8.66634	8.24943	8.65892	8.24265	9.30752	9.19958	9.37537
55.m05093_at	0.00432637	2.02284	TGME49_063870	glutamyl-tRNA synthetase, putative	9.26222	9.18706	9.37859	9.34231	8.16143	8.14806	8.756	8.03918	9.29322	9.21872	9.18706
55.m05098_at	0.00088694	3.45877	TGME49_064030	aminotransferase, putative	8.91522	8.82519	8.58744	8.65353	6.56237	6.85025	7.21863	7.1891	8.45615	7.85803	8.15577
55.m05100_at	0.00582963	3.24765	TGME49_064050	ubiquitin-conjugating enzyme domain-containing protein	8.81095	8.85779	8.602	8.94104	7.6764	6.68513	7.55827	6.49439	8.42681	8.19903	8.42681
55.m05107_at	0.00214998	3.30982	TGME49_064140	hypothetical protein	8.50779	8.74783	7.81918	8.21735	6.85496	6.35373	6.6476	6.52884	7.49942	7.2034	7.5008
55.m05110_at	0.00985737	4.80522	TGME49_064160	ATP-dependent RNA helicase, putative	8.85748	9.1026	7.75144	7.89407	5.93053	6.71891	6.65653	5.24122	8.41024	7.89029	8.26009
55.m08200_at	0.00170395	2.20967	TGME49_063540	hypothetical protein	8.16684	8.07896	8.06985	8.20256	6.72244	6.86034	7.01595	7.34415	7.32222	7.43032	7.1412
55.m08205_at	0.00378188	3.38114	TGME49_061600	X-prolyl aminopeptidase, putative	8.50013	8.39535	8.93153	9.02701	6.65029	6.75849	7.63729	6.77789	8.15612	7.93947	8.10025
55.m08207_at	0.00243845	3.01656	TGME49_059950	carbonic anhydrase-related	7.81274	8.0507	7.62779	8.35327	6.07039	6.68235	6.56601	6.15414	7.21368	7.18401	6.88003
55.m08224_at	0.00679278	2.14033	TGME49_062050	phosphorylase B kinase gamma catalytic chain,	10.4815	10.5713	10.6837	10.8823	9.55335	9.52611	10.0399	9.10816	10.6882	10.5593	10.7639
55.m10244_at	0.0029618	2.28489	TGME49_060990	hypothetical protein	6.68009	6.60794	7.0976	6.86513	5.71893	5.72037	5.81733	5.22562	6.22245	5.66614	6.24467
55.m10249_at	0.00681461	4.27072	TGME49_060400	hypothetical protein	9.72062	9.68266	8.13208	8.77876	7.0226	6.65567	7.10499	7.15294	8.6609	8.35836	8.27692
55.m10255_at	0.00112408	2.79373	TGME49_059830	diacylglycerol kinase, putative	6.90526	7.21668	6.97879	6.99965	5.3438	5.85203	5.27066	5.70513	6.56572	5.69853	6.39036
55.m10278_at	0.00823208	3.45097	TGME49_055980	hypothetical protein	7.5309	7.50862	7.25506	7.16581	4.84068	5.87313	6.40943	5.18914	7.05597	6.20724	7.1128
55.m10302_at	0.000303724	3.05661	TGME49_061510	hypothetical protein	6.88206	6.72344	6.90387	6.98457	5.14203	5.32952	5.12078	5.45388	6.14805	5.87319	6.4641
55.m11052_at	0.00229482	2.71939	TGME49_056810	DnaJ domain-containing protein	6.80554	6.92519	6.54198	6.41654	4.94069	5.39384	5.00397	5.57761	6.69682	6.23664	6.23664
55.m11056_at	0.0078584	2.17981	TGME49_063240	conserved hypothetical protein	9.23764	9.16109	9.15122	9.09515	8.56776	7.49164	7.95228	8.13659	9.14666	8.89104	9.02702
551.m00001_at	0.00418642	2.01638	TGME49_108020	surface antigen	12.2187	12.1671	11.8973	11.9627	10.7082	11.1446	11.3943	10.9516	11.685	11.5459	11.6408
551.m00227_at	0.00234191	2.5288	TGME49_107830	hypothetical protein	9.03419	9.13823	9.17763	8.86044	7.3896	7.74417	8.16031	7.56261	8.30408	8.06535	8.4355
551.m00236_at	0.00130417	2.61491	TGME49_108060	hypothetical protein	8.62407	8.53574	8.04156	8.18163	6.87646	7.01956	6.83549	7.10443	8.12222	7.97905	7.83321
57.m00024_at	0.00600609	3.54582	TGME49_065330	protein kinase 3	9.18573	9.2256	9.56945	9.82903	7.41413	7.78627	8.35855	6.94638	9.15158	8.84211	8.93601
57.m00026_at	0.00218978	4.26987	TGME49_065520	hypothetical protein	8.07581	7.782	7.68512	7.86829	5.30677	6.48981	5.779	5.45887	7.15038	6.80559	6.96012
57.m00034_at	0.00520711	2.56791	TGME49_066810	conserved hypothetical protein	10.2184	10.1668	10.0084	9.99305	8.49887	8.41282	9.42242	8.61023	9.71975	9.53057	9.80077
57.m00037_at	0.00873305	3.63241	TGME49_067510	conserved hypothetical protein	8.7766	8.83182	9.11601	9.32179	7.29774	6.1627	7.90624	7.23582	8.67654	8.35967	8.82481
57.m01690_at	0.0016435	4.14853	TGME49_064610	heterogeneous nuclear ribonucleoproteins-related	8.50285	8.57851	8.64653	8.6278	6.41862	6.47572	7.2038	6.04715	8.57936	8.2461	8.36901
57.m01691_at	0.00379874	2.01995	TGME49_064640	bromodomain domain-containing protein	7.97619	8.16926	8.16069	8.37097	6.76793	7.36764	7.3415	7.14276	7.75223	7.87809	7.71568
57.m01727_at	0.00149043	2.32001	TGME49_065190	hypothetical protein	8.50995	8.48283	8.65701	8.28996	6.96237	7.23702	7.50947	7.37437	8.64629	8.25087	8.63837
57.m01734_at	0.005379	3.61595	TGME49_065270	hypothetical protein	7.6496	7.59914	6.28984	7.06607	5.03793	5.39384	5.304	5.45138	5.65262	5.44698	5.47422
57.m01735_at	0.00375286	2.3888	TGME49_065280	hypothetical protein	7.78617	7.65202	7.92037	8.21121	6.3964	6.93482	6.8783	6.33511	7.81279	7.25471	7.58921
57.m01736_at	0.00937999	3.6703	TGME49_065290	hypothetical protein	9.90184	9.84067	8.93332	9.03154	6.9751	7.24651	8.36239	7.61977	8.79828	8.76948	9.08801
57.m01769_at	0.00446725	2.09512	TGME49_066050	hypothetical protein	8.22326	8.13611	7.67263	8.12618	7.20702	6.6093	7.03863	7.03508	7.54233	7.18842	7.26116
57.m01806_at	0.00183154	4.76862	TGME49_066730	tRNA synthetase, putative	7.77119	7.98689	7.17236	7.5245	5.25447	5.42897	5.9055	4.85172	6.78393	6.45643	6.79922
57.m01832_at	0.0015717	2.30046	TGME49_067040	conserved hypothetical protein	7.96601	7.85851	7.37295	7.6035	6.50323	6.62473	6.41979	6.44552	7.70743	7.01578	7.14294
57.m01834_at	0.00800242	2.65533	TGME49_067070	aquaporin-related	10.7876	10.7262	10.5912	10.9254	9.40923	9.52621	9.87815	8.58116	10.814	10.7769	10.6141
57.m01838_at	0.00728029	3.28156	TGME49_067120	hypothetical protein	10.2685	10.2115	9.5437	9.54823	7.74545	7.87013	8.93741	8.16144	9.94413	9.63689	9.89689
57.m01843_at	0.00103624	2.66546	TGME49_067270	natural resistance-associated macrophage protein	8.85604	8.91006	8.41071	8.91369	7.32947	7.28886	7.23092	7.58372	8.02989	7.76656	7.95441
57.m01846_at	0.00553663	2.61851	TGME49_067330	fumarase, putative	7.76191	7.78107	8.35281	8.2087	6.86071	7.00854	6.57136	6.10888	7.54468	7.18181	7.54468
57.m01867_at	0.000722241	3.00774	TGME49_067550	protein phosphatases PP1 regulatory subunit,	9.49328	9.34436	9.05905	9.09377	7.41045	7.80078	7.82139	7.60311	8.66553	8.6795	8.73152
57.m01885_at	0.00633168	3.31396	TGME49_064470	hypothetical protein	7.24231	6.99505	6.08873	6.28752	4.71136	4.73197	5.41774	4.83832	6.02786	5.26859	5.83628
57.m03110_at	0.00382242	2.64758	TGME49_067050	hypothetical protein	9.9965	9.91415	9.91648	9.83196	8.38335	8.77049	8.93683	7.94972	9.54291	8.74064	9.64935
57.m03121_at	0.00459751	2.28521	TGME49_066680	hypothetical protein	8.12854	8.38516	7.68924	7.68924	6.70366	6.6093	7.08169	6.72821	7.967	7.5233	7.87445
57.m03129_at	0.000421534	2.18805	TGME49_065510	hypothetical protein	7.48332	7.68277	7.67025	7.76837	6.62326	6.46148	6.3991	6.60228	6.83514	7.07553	7.23345
57.m03968_at	0.00338188	3.82746	TGME49_066360	conserved hypothetical protein	10.9677	10.8987	10.2547	10.4647	8.60269	8.41737	9.41427	8.40597	10.3327	10.2304	10.2304
57.m03982_at	0.00224429	2.25936	TGME49_065040	hypothetical protein	9.54473	9.66605	9.28903	9.37625	8.50127	7.9717	8.51509	8.18433	9.53376	9.25286	9.28903
57.m03989_at	0.00883623	2.48664	TGME49_067700	hypothetical protein	8.84059	8.83659	8.51726	8.74188	7.89517	7.08997	7.83409	6.86031	8.52981	8.58317	8.57082
583.m00011_at	0.00166579	4.48578	TGME49_114500	subtilase family serine protease, putative	8.18098	8.23881	8.35967	8.60162	5.60294	6.02868	6.7405	6.34751	8.43092	7.65037	8.01991
583.m00591_at	0.000788911	2.24484	TGME49_109560	fas apoptotic inhibitory molecule-related	10.8938	10.9967	11.0011	11.079	9.59245	9.8394	10.0816	9.79079	10.8934	10.6484	10.8118
583.m00595_at	0.00597638	6.01809	TGME49_109990	conserved hypothetical protein	10.2303	10.308	9.18404	9.82536	7.84953	6.77916	8.09578	6.46602	10.1131	9.92146	9.80958
583.m00596_at	0.00402125	3.92695	TGME49_110000	lung seven transmembrane receptor domain-containing	7.68095	7.7346	8.68123	8.65967	5.77198	6.35051	6.46114	6.27917	8.0329	7.66775	7.72167
583.m00603_at	0.00423865	2.741	TGME49_110260	hypothetical protein	5.96739	5.84839	5.24903	5.82117	4.00031	4.7712	4.05489	4.24076	6.14872	5.61733	5.4058
583.m00609_at	0.00114611	2.19477	TGME49_109850	hypothetical protein	8.29891	8.4517	8.71652	8.37406	7.22132	7.33103	7.54386	7.20869	8.41078	7.71728	8.26501
583.m00634_at	0.00252074	2.08948	TGME49_111480	hypothetical protein	8.60606	8.36258	8.86736	8.89407	7.7496	7.7372	7.42859	7.56211	8.39166	8.25209	8.51597
583.m00647_at	0.00960182	2.99069	TGME49_112530	splicing factor protein, putative	7.41963	7.45184	7.12627	7.46072	6.35455	5.96792	5.97178	4.84228	6.85105	6.69855	6.72476
583.m00652_at	0.00324573	3.15825	TGME49_112420	hypothetical protein	7.42194	7.54717	7.91249	8.25912	5.65896	6.17181	6.37694	6.29651	6.91199	6.98601	6.64579
583.m00661_at	0.00053485	2.90282	TGME49_112600	small heat shock protein, putative	10.533	10.4549	10.2229	10.521	8.77557	8.87466	9.18039	8.75142	10.1346	9.93979	10.0062
583.m00665_at	0.00964551	3.30486	TGME49_112920	hypothetical protein	9.26515	9.13064	9.57988	9.7989	7.71764	7.57735	8.60212	6.9791	8.65669	8.14066	8.65669
583.m00666_at	0.0029618	3.16345	TGME49_113190	ras-related protein RAB18, putative	7.8229	7.85909	7.81104	7.94109	6.00179	5.64656	6.38957	6.75018	7.38946	7.16871	7.17113
583.m00667_at	0.00807468	2.36122	TGME49_113240	DEAD/DEAH box helicase, putative	7.86964	7.50659	7.23085	7.4343	5.87933	5.95419	6.75045	6.49929	7.28942	7.18842	7.07168
583.m00669_at	0.00536121	2.44349	TGME49_113290	phosphatidylinositol-4-phosphate 5-kinase	10.6412	10.507	10.3519	10.4579	8.94506	8.92655	9.8537	9.07689	10.121	9.93283	10.1179
583.m00672_at	0.00162999	7.46753	TGME49_113150	hypothetical protein	10.6118	10.5193	10.2945	10.4912	7.23174	8.01512	8.25666	6.81078	9.79002	9.52717	9.72534
583.m00684_at	0.00102982	5.73032	TGME49_114240	general transcription factor IIIC, polypeptide	8.95027	9.09484	8.93581	9.01062	6.49471	6.25739	7.17469	5.99029	8.1444	7.99102	8.1179
583.m00686_at	0.00926795	2.28459	TGME49_114400	branched-chain alpha-keto acid dehydrogenase,	8.37422	8.32577	9.15244	9.1042	7.61186	7.65503	7.70165	7.22035	8.52829	8.09977	8.40832
583.m00687_at	0.00034506	3.39639	TGME49_114450	hypothetical protein	9.73923	10.0151	9.76421	9.90065	8.07627	7.89855	8.04383	8.34451	9.34375	9.06448	9.23465
583.m00695_at	0.00687163	4.52101	TGME49_115160	hypothetical protein	9.5365	9.25273	9.51456	9.33728	6.99824	7.08812	8.39214	6.45598	8.83642	8.56695	8.91025
583.m00696_at	0.00697954	2.81309	TGME49_115130	protein-L-isoaspartate O-methyltransferase	9.00427	9.00642	9.4775	9.52779	7.96927	7.06876	8.22455	7.78478	8.47529	8.43118	8.47529
583.m00697_at	0.00516369	2.11866	TGME49_115110	prefoldin subunit 5, putative	9.87013	9.86893	9.93554	9.96197	9.34405	8.51985	8.86293	8.57714	9.98049	9.81485	10.1135
583.m00713_at	0.00679857	2.96712	TGME49_112220	mitochondrial import inner membrane translocase	9.05462	8.81075	8.56443	8.65706	6.70971	6.81266	7.36941	7.91883	8.09989	7.54023	8.05086
583.m05284_at	0.00752151	2.2095	TGME49_109290	HD domain-containing protein	7.91303	7.94217	7.54003	7.46763	6.56379	6.40138	7.09737	6.22547	7.66636	7.15297	7.59275
583.m05310_at	0.00228752	4.63754	TGME49_109870	PX domain-containing protein	8.39164	8.59561	7.66155	8.66052	6.08129	6.17243	5.64649	6.55569	7.77183	7.20486	7.15892
583.m05316_at	0.00277748	5.38699	TGME49_109930	alpha-N-acetylgalactosaminidase, putative	8.50208	8.64264	7.53331	7.81722	5.45283	6.14546	5.96793	5.2111	7.94296	7.78246	7.39959
583.m05332_at	0.00766635	2.31293	TGME49_110130	conserved hypothetical protein	8.59141	8.47533	8.22134	8.01423	6.82693	7.30628	7.59164	6.73859	8.22676	7.62436	8.01423
583.m05333_at	0.00707924	2.3952	TGME49_110140	hypothetical protein	8.00802	8.07574	7.34673	7.47446	6.51034	6.40731	6.85855	6.08816	7.53411	6.89901	7.31472
583.m05338_at	0.000558823	5.19532	TGME49_110190	hypothetical protein	8.51679	8.69029	8.04213	8.1222	6.00177	5.86659	6.26012	5.73409	8.02554	7.59975	7.58187
583.m05357_at	0.00497213	2.59136	TGME49_110430	heat shock protein 90, putative	8.64919	8.64854	8.78603	8.75131	7.65505	6.96621	7.81976	6.89921	8.54384	8.58503	8.54384
583.m05373_s_at	0.00458694	2.91386	TGME49_110600	hypothetical protein	8.08547	8.03437	8.02684	8.1496	5.87447	6.83773	7.03259	6.37977	7.27816	6.67252	7.27816
583.m05396_at	0.00310729	3.84631	TGME49_110910	WD domain, G-beta repeat-containing protein	8.74688	9.06611	8.42709	8.44705	6.47321	6.80113	7.38162	6.25726	8.63361	8.50376	8.23343
583.m05434_at	0.00019602	2.02135	TGME49_111450	zinc finger (C2H2 type) protein, putative	9.35566	9.402	9.34793	9.34793	8.36691	8.30103	8.4624	8.26189	9.30488	9.37749	9.37642
583.m05450_at	0.00473459	2.42036	TGME49_111750	hypothetical protein	9.60452	9.56231	9.31151	9.44778	8.69763	7.83484	8.39787	7.89488	9.15948	9.26002	9.16692
583.m05454_at	0.0012459	2.09533	TGME49_111790	hypothetical protein	7.49763	7.4619	7.12642	7.31971	6.08525	6.44443	6.37405	6.23323	6.66283	6.5796	6.71455
583.m05475_at	0.0093282	3.64819	TGME49_112280	ATP-dependent RNA helicase, putative	8.93476	8.96511	8.85769	8.93189	6.6061	6.24928	8.01124	7.35412	8.82397	8.38121	8.62894
583.m05483_at	0.00678443	3.34868	TGME49_112390	hypothetical protein	8.77004	8.65021	9.16338	9.13193	6.97282	7.23702	7.99493	6.53641	8.49705	8.27399	8.62315
583.m05517_at	0.000998405	2.55385	TGME49_112990	ATP-dependent RNA helicase, putative	7.44266	7.06695	7.1837	7.24925	6.08111	5.64654	5.74063	6.06358	6.64027	6.19668	6.53992
583.m05524_at	0.00287116	4.24292	TGME49_113060	eukaryotic translation initiation factor 2B,	8.91165	8.84301	8.45364	8.64461	6.1865	7.23702	6.97114	6.11801	8.2992	7.76996	8.03729
583.m05562_at	0.00887356	3.10475	TGME49_113560	60S ribosomal protein L7a, putative	8.06777	8.0084	8.36763	8.41924	6.87771	7.04892	6.76993	5.62858	7.97107	7.46237	7.95012
583.m05572_at	0.00347204	2.68009	TGME49_113680	hypothetical protein	5.45236	5.96494	5.24161	5.48095	4.41291	3.90905	3.78945	4.33934	4.60623	4.7855	4.93593
583.m05588_at	0.00423865	2.301	TGME49_113910	RNA recognition motif 2 domain-containing protein	11.4293	11.6809	11.3775	11.4695	9.77103	10.3217	10.6471	10.4084	11.1328	10.9732	10.8925
583.m05596_at	0.00939524	2.95885	TGME49_114040	cytochrome c heme lyase, putative	7.72566	7.83341	8.11644	8.09893	5.62734	6.08336	6.8968	6.90678	7.92068	7.39213	7.81622
583.m05616_at	0.00883623	2.59762	TGME49_114410	hypothetical protein	9.86429	9.79459	10.0059	10.0264	8.10561	8.63253	9.30297	8.14138	10.0206	9.68615	9.96162
583.m05617_at	0.00723508	4.79614	TGME49_114420	adapter-related protein complex, putative	8.34198	8.19355	8.28795	8.26549	5.19834	6.61622	6.90933	5.31759	8.41358	7.76325	8.33565
583.m05624_at	0.000818578	6.69937	TGME49_114530	hypothetical protein	8.53163	8.76665	7.85966	8.2013	5.78995	5.5076	5.91112	5.17447	7.51546	7.14897	7.03825
583.m05626_at	0.00600609	3.1971	TGME49_114550	hypothetical protein	7.99219	8.11943	7.39215	7.50153	5.78292	5.77129	6.81742	5.92661	7.66455	7.09852	7.18987
583.m05630_at	0.00763066	2.2465	TGME49_114700	hypothetical protein	8.07392	8.35206	7.74425	7.76894	6.93519	7.27723	6.51123	6.54482	7.33482	7.2122	7.13955
583.m05642_at	0.00663944	3.16632	TGME49_114830	splicing factor 3b subunit 10, putative	9.69021	9.58956	10.0308	9.96083	8.27186	8.09741	8.8453	7.40562	9.46042	9.17267	9.79422
583.m05643_at	0.00203384	2.62965	TGME49_114850	NRD convertase-related	8.63191	9.01272	8.69251	8.5512	7.4524	7.0583	7.68591	7.11223	8.38768	7.9134	8.41691
583.m05653_at	0.00633168	2.10591	TGME49_115080	hypothetical protein	6.65811	7.10102	6.70069	6.71723	5.38079	5.75277	6.18325	5.56245	6.89889	6.38997	6.65811
583.m05664_at	0.00504518	3.96474	TGME49_115230	hypothetical protein	8.75307	8.69885	7.68924	8.07648	6.17024	6.68505	6.68886	5.72458	7.9093	7.22657	7.73588
583.m05685_at	0.0050635	3.48478	TGME49_115480	acyl-CoA oxidase, putative	6.33626	6.0079	6.61418	7.05358	5.367	4.44959	4.48279	4.50826	5.48303	5.47427	5.24449
583.m05698_at	0.0012459	3.81298	TGME49_115640	biotin/lipoate A/B protein ligase domain-containing	8.35156	8.36804	8.07723	8.46692	6.21397	6.67044	6.73232	5.92333	7.76458	7.55941	7.60172
583.m05736_at	0.000506704	3.62378	TGME49_116250	hypothetical protein	9.67788	9.51072	9.0836	9.3984	7.50116	7.46819	7.50947	7.76178	9.22421	9.05884	8.98276
583.m05756_at	0.0029803	2.43502	TGME49_116520	1,4-alpha-glucan branching enzyme, putative	8.10265	8.23777	7.82036	7.79218	6.93428	6.26819	6.72797	6.88679	7.73582	7.32277	7.41627
583.m05757_at	0.00559155	2.80902	TGME49_116530	myosin heavy chain-related	7.16747	7.12394	6.76993	6.80518	4.98108	5.48429	6.14728	5.2936	6.74292	5.69295	6.44292
583.m09113_at	0.00961339	2.57007	TGME49_112040	hypothetical protein	8.75628	8.85034	8.60051	8.50451	7.32351	6.83021	8.09696	7.01372	8.59799	8.19357	8.4503
583.m11412_at	0.0029364	3.92599	TGME49_111010	conserved hypothetical protein	8.67655	8.44407	9.33885	9.53294	7.24615	7.03684	7.11415	6.70303	8.23983	7.97781	8.1153
583.m11434_at	0.000185169	3.51623	TGME49_108830	dual specificity phosphatase, catalytic domain	8.13397	8.10637	7.91676	8.16131	6.1719	6.25936	6.32152	6.30951	7.35384	6.91144	7.35384
583.m11442_at	0.00602398	2.04873	TGME49_109790	hypothetical protein	6.4178	6.28834	6.42516	6.43931	5.03007	5.20158	5.30847	5.89158	6.03633	5.73389	5.82777
583.m11449_at	0.00183092	3.37503	TGME49_110740	hypothetical protein	7.47736	7.56919	8.01906	8.07926	6.48677	5.8968	5.80307	5.93863	7.35143	7.03385	7.22505
583.m11450_at	0.0070405	2.95882	TGME49_110980	hypothetical protein	9.13042	9.29901	9.02604	9.22054	6.96016	7.24901	8.17659	8.03016	8.6044	8.43502	8.6044
583.m11457_at	0.00998087	2.54292	TGME49_112210	conserved hypothetical protein	6.91746	7.11939	6.78651	7.12296	5.78461	6.22566	4.88837	5.66173	6.78634	6.17496	6.69488
583.m11472_at	0.00775424	4.57173	TGME49_116160	conserved hypothetical protein	8.09375	8.23002	7.50215	7.46611	5.08024	6.57194	5.95687	4.91202	7.01393	6.46899	6.86913
59.m00021_at	0.00171593	2.40153	TGME49_068810	casein kinase II beta chain, putative	6.79998	7.05107	6.80299	6.95931	5.37188	5.97942	5.75006	5.45618	6.41518	6.16179	6.23818
59.m00022_at	0.00572305	2.03039	TGME49_068840	hypothetical protein	7.34875	7.58064	7.85853	7.64012	6.17639	6.55815	6.88962	6.71686	7.05577	6.53658	6.83924
59.m00023_at	0.00229482	3.55223	TGME49_068960	hypothetical protein	8.25189	8.22895	8.27051	8.41288	6.27198	6.5992	7.05482	5.92333	7.69489	7.32322	7.52501
59.m00027_at	0.00590174	2.64668	TGME49_069180	MIF4G domain-containing protein	7.93036	7.80581	7.86463	7.80581	6.27011	6.17058	7.20598	6.1432	8.24754	7.61344	7.87394
59.m00031_at	0.00214248	3.01505	TGME49_069920	phosphatidylserine decarboxylase proenzyme,	8.00782	8.19595	8.78438	8.40317	6.44234	6.69972	6.84545	7.03508	8.05986	7.07788	7.69074
59.m00035_at	0.00914772	2.65738	TGME49_070870	hypothetical protein	8.10264	8.19865	7.81576	8.00486	6.90536	5.93073	7.22754	6.41825	7.64012	7.08877	7.51623
59.m00039_at	0.00480272	3.49256	TGME49_071300	DNA-directed RNA polymerase II	9.18791	9.16607	8.68946	8.55486	7.63009	6.67568	7.46021	6.61519	8.58575	8.1347	8.68319
59.m00040_at	0.00301347	2.75766	TGME49_071350	folylpolyglutamate synthase, putative	7.20918	7.30382	7.60552	7.71444	5.55073	6.41247	6.04163	5.97435	7.15459	6.48944	6.6308
59.m00046_at	0.00320677	5.50347	TGME49_071840	hypothetical protein	9.21667	9.24194	9.03433	9.24842	7.20315	6.40199	7.43543	5.85944	8.6442	8.00421	8.46488
59.m00050_at	0.000570357	4.43595	TGME49_072420	1-O-acylceramide synthase-related	8.72234	8.96874	8.38918	8.51134	6.48103	6.34496	6.84545	6.32318	8.15836	7.65906	8.02
59.m00055_at	0.00470921	2.16228	TGME49_073460	eukaryotic translation initiation factor 3	8.72228	8.72194	9.32932	8.98951	7.77305	7.81564	8.15724	7.56692	8.83103	8.43206	8.7571
59.m00063_at	0.00195427	2.25542	TGME49_073870	chromatin remodelling complex protein SNF2L,	8.52826	8.40713	8.58813	8.8958	7.42856	7.20843	7.71976	7.36899	8.31754	7.822	8.31754
59.m00073_at	0.00457387	3.11345	TGME49_071820	lipoate-protein ligase A, putative	8.03177	7.99184	8.15403	8.22297	5.98188	6.13187	7.19062	6.54218	7.87244	7.48332	7.69086
59.m00076_at	0.000951872	3.41794	TGME49_070530	ubiquitin fusion degradation (UFD1) domain	8.09369	7.96987	7.82634	7.99035	6.16397	6.02668	6.67377	5.92333	7.90037	7.44352	7.65797
59.m00077_at	0.00503558	2.97096	TGME49_070320	protein phosphatase 2C, putative	9.06443	9.24886	9.04685	9.15946	6.85243	7.8874	7.43979	8.05627	8.60547	8.39367	8.59105
59.m00078_at	0.00221049	2.02624	TGME49_070300	zinc finger, ZZ type domain-containing protein	8.96622	9.06934	8.57753	8.93568	7.7496	7.98035	8.03502	7.7086	8.62079	8.51892	8.51892
59.m00082_at	0.00489011	2.44768	TGME49_070000	hypothetical protein	8.66506	8.33902	8.32451	8.23506	6.69804	6.99811	7.65769	7.04415	8.23506	7.99085	8.23506
59.m00084_at	0.00348059	3.97039	TGME49_069700	NLI interacting factor-like phosphatase domain	10.0639	10.1473	9.60933	9.60923	7.95848	7.96466	8.41826	7.13118	9.2928	9.33708	9.35144
59.m03385_at	0.00873305	3.3895	TGME49_068390	hypothetical protein	7.68316	7.66167	6.61238	7.20689	6.2596	5.02048	5.34705	5.49268	6.6587	6.50137	6.14532
59.m03391_at	0.00531994	2.9295	TGME49_068590	rhomboid family domain-containing protein	10.2618	10.2008	9.72827	9.81355	7.82615	8.55429	8.98281	8.43858	9.70319	9.39056	9.64073
59.m03397_at	0.00353535	4.65753	TGME49_068660	hypothetical protein	9.88811	9.82617	8.51721	8.91107	6.97797	7.05414	7.11662	7.11556	8.6324	8.47185	8.5253
59.m03402_at	0.00203384	2.90901	TGME49_068750	peptidyl-prolyl cis-trans isomerase E-related	8.86131	8.66349	9.05343	9.03225	6.94097	7.49297	7.76761	7.2468	8.94781	8.47465	8.63837
59.m03405_at	0.00189601	3.71139	TGME49_068780	hypothetical protein	8.65636	8.83643	8.15225	8.21343	6.59651	6.4588	7.02102	6.21429	8.11786	8.02643	7.74365
59.m03406_at	0.00524994	2.06604	TGME49_068790	hypothetical protein	11.1352	11.2999	11.1743	11.0656	9.90921	9.80591	10.6029	10.1694	10.8655	10.7297	10.8764
59.m03416_at	0.00559887	2.43557	TGME49_068910	mitochondrial inner membrane protease, putative	9.3215	9.11751	9.44689	9.19139	8.60438	7.59028	7.80049	7.94511	8.88858	8.65353	8.81009
59.m03424_at	0.00393943	2.79813	TGME49_069010	hypothetical protein	6.55381	6.57033	6.05647	6.215	4.51077	4.79389	5.43777	4.71533	5.89384	5.5048	5.81601
59.m03442_at	0.00623834	3.6547	TGME49_069260	hypothetical protein	8.43407	8.43904	7.57764	7.42012	5.53752	6.58661	6.13122	6.13649	7.46992	6.76593	7.29667
59.m03468_at	0.00826212	2.55056	TGME49_069720	hypothetical protein	9.5062	9.38768	8.55467	8.99806	7.47835	7.79155	8.22882	7.54463	9.06725	9.0078	8.80244
59.m03482_at	0.000795139	2.7014	TGME49_069900	WD-repeat protein, putative	8.36	8.31374	8.20014	8.39101	6.78056	7.03521	7.13492	6.57937	8.55093	7.9978	8.1153
59.m03496_at	0.00325733	3.99545	TGME49_070070	vesicle trafficking protein, putative	9.78314	9.7892	9.16566	9.50626	6.8315	7.81572	8.03182	7.5718	9.6278	9.26898	9.48352
59.m03502_at	0.00775424	3.63833	TGME49_070200	hypothetical protein	7.7138	7.71668	8.33695	8.90483	5.70982	6.23876	6.84671	6.42386	7.6506	6.79126	7.24569
59.m03510_at	0.000620275	3.21303	TGME49_070310	acyl carrier protein (ACP)	10.7171	10.6966	10.2125	10.4607	8.66474	8.85078	9.04245	8.79315	10.0689	9.74043	9.99575
59.m03515_at	0.00752151	3.32594	TGME49_070370	clathrin-associated adaptor complex small chain	7.98763	7.96987	8.4006	8.50877	6.51034	6.08336	7.35293	5.98518	8.17612	7.85871	8.06624
59.m03528_at	0.00435697	2.66069	TGME49_070690	conserved hypothetical protein	9.55409	9.73676	9.50044	9.54985	7.93898	8.24498	8.77897	7.73101	9.38419	9.09784	9.39072
59.m03529_at	0.0012459	3.91574	TGME49_070700	hypothetical protein	9.48673	9.3387	9.47815	9.68638	7.09977	7.29214	7.97806	7.74286	8.67672	8.50285	8.67672
59.m03534_at	0.000185169	3.47901	TGME49_070780	DNA-directed RNA polymerase IIB, putative	7.6248	7.42603	7.44988	7.40502	5.60371	5.68497	5.6311	5.79126	6.82254	6.31677	6.82254
59.m03536_at	0.00568687	4.19383	TGME49_070800	GAF domain-containing protein	6.10939	6.03184	7.03619	7.25436	4.15749	4.54476	5.09777	4.35868	4.86372	5.49351	4.88654
59.m03547_at	0.00924468	3.72548	TGME49_070960	hypothetical protein	8.24446	8.22727	7.24914	7.25669	6.57713	5.83175	5.76652	5.21246	6.99087	6.70199	6.82541
59.m03554_at	0.00396917	2.70048	TGME49_071100	hypothetical protein	7.47515	7.25424	7.73907	7.40347	5.60404	6.23359	5.79267	6.50877	7.14928	6.86138	7.05387
59.m03600_at	0.00728029	2.54952	none	hypothetical protein	10.7892	10.4855	10.5554	11.0919	9.30343	9.19185	10.0283	8.99754	10.4594	10.2306	10.4322
59.m03611_at	0.00277605	2.05956	TGME49_072230	heat shock protein HSLV, putative	7.2572	7.30947	7.02404	7.52629	6.0667	6.51503	6.07702	6.28891	7.24853	6.70761	7.0775
59.m03623_at	0.00372937	3.95435	TGME49_072370	hypothetical protein	10.7171	10.9561	9.67988	9.99575	8.1377	8.3167	8.44111	8.51962	9.6095	9.12504	9.05985
59.m03632_at	0.00150762	2.7556	TGME49_072470	protein kinase-related	6.84657	7.15344	6.76943	6.74037	5.15886	5.19771	5.7178	5.58598	6.65035	6.08001	6.51609
59.m03635_at	0.0038985	3.2432	TGME49_072520	conserved hypothetical protein	10.2536	10.1456	9.81739	10.1445	8.0031	8.54826	9.04299	7.97705	10.0159	9.81739	9.87171
59.m03655_at	0.00939153	2.37444	TGME49_072910	TCP-1/cpn60 family chaperonin, putative	8.01419	7.8621	8.38282	8.49923	7.5541	6.90978	6.74916	6.55495	7.96771	7.63087	7.8621
59.m03658_at	0.00572278	3.96029	TGME49_073050	hypothetical protein	10.0322	9.97067	9.50918	9.8963	7.65177	7.36854	8.868	7.57766	9.45055	9.4272	9.44412
59.m03661_at	0.0064301	2.105	TGME49_073090	cell division protein 48, putative	7.40939	7.64527	8.08423	7.6689	6.96379	6.75045	6.49407	6.30421	7.45669	7.44693	7.45669
59.m03670_at	0.000826695	2.86114	TGME49_073310	hypothetical protein	10.1565	9.97012	9.6269	9.92872	8.39757	8.15135	8.56464	8.50234	9.65159	9.42327	9.62818
59.m03671_at	0.00664143	3.41585	TGME49_073320	hypothetical protein	11.4482	11.5051	10.8377	11.0706	8.67831	9.54191	10.118	9.43433	10.6838	10.5378	10.6665
59.m03682_at	0.00130095	2.86289	TGME49_073490	glutamine synthetase, putative	7.32141	7.15738	7.42816	7.70213	5.60987	5.75875	6.13507	6.03552	7.22057	6.55469	6.99249
59.m03686_at	0.00615871	2.54248	TGME49_073530	cytochrome b5-related	9.43696	9.55764	9.79603	9.84881	8.02719	8.11136	8.99828	8.11767	9.2618	8.94451	9.08114
59.m03691_at	0.005499	2.21148	TGME49_073640	hypothetical protein	9.407	9.36764	8.76806	8.98718	8.20502	7.79704	7.71593	8.23183	8.60978	8.75155	8.68868
59.m03695_at	0.00711573	2.43365	TGME49_073690	serine/threonine-protein kinase-related	9.89085	9.81789	9.52157	9.71729	8.37131	8.31342	9.1184	8.01196	9.56768	9.1324	9.39072
59.m03696_at	0.00220717	3.79658	TGME49_073730	hypothetical protein	8.02898	8.26613	8.45391	8.49814	6.92629	5.96854	6.61458	6.03895	8.15035	7.64452	7.81435
59.m03703_at	0.00245699	3.82445	TGME49_073810	hypothetical protein	8.48582	8.63083	8.35166	8.43026	6.34447	7.00783	6.90543	5.89984	7.97808	7.38808	7.78674
59.m03707_at	0.0032516	2.48626	TGME49_073860	hypothetical protein	11.0014	11.2815	11.1225	11.299	9.48708	9.79736	10.3689	9.79509	10.8188	10.7055	10.6975
59.m03724_at	0.00599503	2.39914	TGME49_074110	O-sialoglycoprotein endopeptidase-related	8.78934	9.10737	9.00391	9.04049	7.1945	7.8796	8.2346	7.58233	8.80141	8.33957	8.55646
59.m06076_at	0.00320943	2.9182	TGME49_072530	hypothetical protein	7.23567	7.30536	6.61664	7.14671	5.36648	5.43792	5.28863	6.03103	6.83058	6.34813	6.67043
59.m06080_at	0.00252594	2.16399	TGME49_073720	hypothetical protein	7.64073	7.57792	7.78844	7.70818	6.22168	6.69301	6.44808	6.89771	7.54118	7.34603	7.46029
59.m06086_at	0.000591378	3.89799	TGME49_073790	hypothetical protein	9.39388	9.45818	9.31505	9.69331	7.41581	7.19816	7.86629	7.52925	8.9132	8.33917	8.69369
59.m06091_at	0.00261051	2.36008	TGME49_073520	proteasome PCI domain-containing protein	8.75319	8.75032	9.21571	9.0823	7.60402	7.47591	8.06439	7.70185	8.57102	8.33361	8.46856
59.m06094_at	0.00952152	3.61478	TGME49_073350	molybdenum cofactor synthesis protein	9.43008	9.37335	8.67313	8.9188	6.54953	7.25028	8.19708	6.98282	8.30888	7.77086	8.12983
59.m06097_at	0.00924299	2.26524	TGME49_072630	small nuclear ribonucleoprotein, putative	10.8572	10.9122	10.2836	10.4318	9.85173	9.22166	9.67203	9.02078	10.5506	10.1945	10.5123
59.m07762_s_at	0.00130909	2.3895	NONE	inositol trisphosphate 3-kinase activity	9.05858	8.95163	8.77433	9.00346	7.67236	7.68467	8.00578	7.39836	8.72786	8.81416	8.72786
59.m07797_at	0.00536602	3.9989	TGME49_073620	conserved hypothetical protein	7.67324	7.52735	8.03615	7.81301	5.22287	5.50733	6.74941	5.57173	7.82596	6.86693	7.51478
59.m08335_at	0.00112182	2.31161	TGME49_070610	hypothetical protein	8.38102	8.29278	7.95357	7.9803	7.01769	7.03014	6.75045	6.97379	7.76306	7.462	7.67611
63.m00001_at	0.00409154	2.39606	TGME49_075470	hypothetical protein / jlp2	8.36705	8.42149	8.64854	9.06634	7.0461	7.31035	7.4462	7.6581	8.12975	8.00583	7.88413
63.m00151_at	0.000534822	2.53491	TGME49_075420	hypothetical protein	6.72184	6.84047	6.52323	6.50677	5.3852	5.22444	5.16105	5.45388	6.14532	5.57691	6.14532
63.m00155_at	0.00207408	4.56048	TGME49_075460	hypothetical protein	10.5275	10.5411	9.71373	10.0578	7.80895	7.63452	8.55034	8.08964	9.54188	9.54407	9.35713
63.m00265_at	0.00710148	2.33325	TGME49_075480	myb-like DNA-binding domain-containing protein	7.45538	7.41158	7.97796	7.94701	6.02824	6.67531	6.84285	6.35617	7.59851	6.90203	7.40774
64.m00325_at	0.00462505	2.06677	TGME49_075640	ppg3, putative	8.91352	8.79318	8.38593	8.488	7.35201	7.43578	7.70504	7.89829	8.29642	7.96227	8.29642
64.m00341_at	0.00552787	2.59828	TGME49_075860	hypothetical protein	11.0631	10.9771	10.8796	10.8384	9.04558	9.61011	10.1958	9.39647	10.7203	10.4335	10.596
64.m00348_at	0.00301698	3.16986	TGME49_076170	phosphatidylinositol 3- and 4-kinase domain	9.78344	9.79836	9.57485	9.65868	7.73015	7.53852	8.45753	8.43144	9.19273	9.20408	9.18315
641.m00008_at	0.00402125	3.22686	TGME49_120480	ras-related protein RAB11B, putative	9.33785	9.4406	8.90354	8.94977	7.67781	7.25464	8.00578	6.93303	9.1272	8.70962	8.94966
641.m00177_at	0.00721318	2.61124	TGME49_119920	lipoamide acyltransferase	8.98385	8.98385	9.41247	9.44194	8.37359	7.32076	8.03457	7.55424	9.1131	8.93919	9.08181
641.m00182_at	0.00183066	3.08911	TGME49_120630	choline kinase, putative	7.79908	7.67722	8.16703	8.37127	6.06415	6.50058	6.62466	6.31644	7.73435	7.17061	7.54185
641.m00190_at	0.00599778	2.70586	TGME49_118620	tRNA-splicing endonuclease positive effector,	8.04938	8.05217	8.16666	8.42602	6.72136	6.67362	7.38162	6.17327	7.979	8.09844	7.91248
641.m01461_at	0.004496	3.0503	TGME49_118170	hesB protein-related	9.47504	9.51071	9.53715	9.58587	7.43871	7.74752	8.68643	7.80031	9.01142	8.85666	9.07095
641.m01470_at	0.00130417	2.18422	TGME49_118310	transketolase, putative	8.12742	8.28576	8.52936	8.26436	7.22622	7.38365	7.14659	6.94196	8.10238	8.0905	8.10238
641.m01473_at	0.000766314	3.501	TGME49_118330	MYST-type acetyltransferase	7.54692	7.90469	7.94132	8.1294	6.32112	5.7878	6.14834	6.03402	7.4895	7.06448	7.4413
641.m01480_at	0.00203384	3.2476	TGME49_118440	DEAH-box RNA/DNA helicase, putative	8.36097	8.59215	8.17269	8.34471	6.33625	6.33236	7.13945	6.86497	7.84008	7.63784	7.60788
641.m01490_at	0.00847845	3.18504	TGME49_118550	hypothetical protein	7.82891	8.02655	7.86762	7.99104	5.81623	5.54504	6.90351	6.76411	8.22676	7.86762	8.15863
641.m01491_at	0.000657284	2.44804	TGME49_118560	3-methyl-2-oxobutanoate dehydrogenase	7.97634	8.00573	7.94201	7.82888	6.7252	6.39347	6.88905	6.57872	7.65601	7.53245	7.69178
641.m01494_at	0.000631375	3.70495	TGME49_118600	DNA/pantothenate metabolism flavoprotein domain	8.01667	8.00601	7.73981	8.16516	5.77685	6.04338	6.42832	6.12129	7.4961	6.71217	7.11893
641.m01505_at	0.00123608	6.81141	TGME49_118750	deoxyribose-phosphate aldolase, putative	9.31829	9.26131	8.44515	9.04806	6.35455	5.96063	6.83415	5.85166	8.67527	8.13501	8.22232
641.m01513_at	0.00392282	2.52136	TGME49_119340	hypothetical protein	10.2184	10.4461	10.5291	10.3449	8.45661	9.33438	9.13686	9.27391	10.1634	10.0746	10.0736
641.m01530_at	0.00060885	3.39242	TGME49_119670	hypothetical protein	8.2459	7.78154	7.8878	7.77239	6.32538	5.96271	6.02147	6.32881	6.98761	7.03308	7.18675
641.m01535_at	0.00172776	4.06592	TGME49_119850	splicing factor u2af protein-related	8.09002	8.00451	8.0138	8.05182	5.91266	5.80098	6.72726	5.62492	7.6623	7.33459	7.55972
641.m01548_at	0.00229482	4.02918	TGME49_120020	L-type amino acid transporter-related	7.15928	7.42785	7.61224	7.60147	4.7141	5.65762	5.57136	5.8158	7.08026	6.40877	6.56619
641.m02539_at	0.000798457	3.17127	TGME49_118570	hypothetical protein	7.67331	7.62055	7.57087	7.68733	6.00177	5.79798	6.38905	5.70302	7.24742	6.79625	7.24742
641.m02554_at	0.00112702	3.37072	TGME49_120000	hypothetical protein	8.93322	8.7948	8.5083	8.66736	6.85534	6.85087	7.44617	6.73908	8.25894	8.24206	8.35759
641.m02557_at	0.00932721	2.48703	TGME49_120070	CDK-activating kinase assembly factor, putative	9.23973	9.27524	9.18943	9.29312	7.50749	7.844	8.73743	7.65088	9.39003	9.08822	9.1156
641.m03151_at	0.00120802	3.16544	TGME49_119960	conserved hypothetical protein	9.87663	9.73134	9.12999	9.38762	7.98848	7.80303	7.94203	7.74241	9.14153	9.06691	9.12597
641.m03162_at	0.00436639	2.65061	TGME49_120130	hypothetical protein	8.41651	8.22952	8.04178	8.14563	6.63762	7.23128	7.07508	6.26417	7.96069	7.66793	7.91819
645.m00037_at	0.00280917	2.32911	TGME49_121530	cathepsin L-like thiolproteinase, putative	8.9118	8.90086	8.77084	9.0907	7.27295	7.68538	8.04606	7.79068	8.72894	8.60886	8.54397
645.m00305_at	0.00771702	3.1329	TGME49_121290	pre-mRNA splicing factor 18, putative	9.65597	9.28093	9.33626	9.16863	7.3884	7.73539	8.57134	7.15666	9.47859	9.00788	9.52968
645.m00306_at	0.000924195	2.41113	TGME49_121300	hypothetical protein	6.34813	6.28687	6.03662	5.86964	4.86704	4.84804	4.73944	5.0079	5.04613	5.40253	5.3572
645.m00314_at	0.00313615	2.2131	TGME49_121450	myb-like DNA-binding domain-containing protein	7.81128	7.82098	7.40658	7.32524	6.47722	6.51559	6.13967	6.64733	7.37448	6.99555	7.23104
645.m00329_at	0.00380096	2.19615	TGME49_121670	phosphatidylinositol glycan, class B-related	8.4904	8.40193	7.80938	7.91033	6.97363	6.9614	6.9614	7.17571	8.40493	8.02839	8.17805
645.m00330_at	0.00220717	3.1417	TGME49_121680	hypothetical protein	8.85211	8.71879	8.87072	8.95571	7.29768	6.96691	7.74838	6.77817	8.42082	8.28847	8.42676
645.m00549_at	0.00183623	2.44906	TGME49_121330	zinc finger (C2H2 type) protein, putative	7.71384	7.83944	7.27917	7.37617	6.18978	6.50305	6.08336	6.26353	7.28395	6.72367	7.17518
645.m00686_at	0.00330986	3.14816	TGME49_121630	hypothetical protein	7.30669	7.3061	6.85454	6.98177	5.43609	6.06408	5.32641	5.00449	7.13672	6.32005	6.82271
65.m00006_at	0.00217675	2.08194	TGME49_076890	hypothetical protein	7.26074	7.53909	7.46723	7.47821	6.6026	6.54911	6.05764	6.30421	7.1952	6.47996	7.20239
65.m00009_at	0.00375892	3.51372	TGME49_077090	mitochondrial carrier domain-containing protein	7.268	7.45923	7.15881	7.40463	6.33522	5.26084	5.29843	5.14418	6.9024	6.61853	6.9024
65.m00012_at	0.000634286	3.4493	TGME49_077840	GTPase ras-related protein rab-2a-related	10.0022	10.0941	9.83615	9.94227	8.04283	7.97099	8.60397	8.11177	9.50348	9.20424	9.44309
65.m00026_at	0.00671854	2.3421	TGME49_078040	G-patch domain-containing protein	9.15795	9.13405	9.2876	9.25062	7.83779	7.51132	8.60978	7.96014	9.13293	8.36346	8.92597
65.m00028_at	0.00599778	2.56092	TGME49_077500	26S proteasome AAA-ATPase subunit RPT1, putative	7.35202	7.44018	8.08278	7.8274	5.88601	6.23206	6.756	6.40166	7.26989	6.88322	7.30768
65.m01091_at	0.00704411	2.24618	TGME49_076910	endoplasmic reticulum retention receptor, putative	8.07842	8.12896	7.80035	8.11388	7.47025	6.72197	6.7684	6.49111	7.71409	7.45318	7.46993
65.m01095_at	0.00989017	2.52708	TGME49_076990	membrane associated progesterone receptor	7.67983	7.45153	8.06019	8.31569	6.58948	6.86722	6.77732	5.92333	7.72019	7.38554	7.3369
65.m01108_at	0.00574655	2.62552	TGME49_077260	hypothetical protein	9.40856	9.40411	9.46397	9.4209	7.93358	7.54651	8.73891	7.90813	9.09468	8.81375	9.06224
65.m01113_at	0.00493475	2.75844	TGME49_077490	hypothetical protein	7.99521	8.16485	8.21866	8.1812	5.93381	6.95668	6.93063	6.8834	7.70564	7.36463	7.56357
65.m01122_at	0.0011835	2.46621	TGME49_077680	hypothetical protein	9.08125	8.99443	8.86888	9.09853	7.67557	7.7047	8.03961	7.41403	8.99494	8.68447	8.90948
65.m01123_at	0.00241003	2.61801	TGME49_077700	mitochondrial ribosomal protein S14 precursor	9.84051	9.86028	9.97823	10.0471	8.37547	8.34824	9.08962	8.3589	10.094	9.86847	10.0966
65.m01134_at	0.00478327	3.11526	TGME49_077870	conserved hypothetical protein	7.95825	7.91978	7.64358	7.81809	5.73485	6.51706	6.79221	5.73815	7.26159	6.86073	7.26159
65.m01144_at	0.00329994	2.93517	TGME49_078030	hypothetical protein	7.96457	7.95488	7.5429	7.71444	5.88834	6.78123	6.3701	5.92333	7.11362	6.33138	6.90787
65.m01155_at	0.000347733	2.25807	TGME49_078170	hypothetical protein	8.76391	8.86804	8.77899	8.80939	7.56153	7.68934	7.80126	7.46784	8.66532	8.39977	8.53093
65.m01157_at	0.00542983	3.01265	TGME49_078210	hypothetical protein	9.54059	9.74268	9.25419	9.08918	7.5131	8.00211	8.40874	7.33857	8.80832	8.3975	8.93672
65.m01187_at	0.00517681	2.70826	TGME49_078730	guanine nucleotide-binding protein-related	8.4269	8.51301	7.85524	7.93393	6.59108	7.19463	6.87568	6.31825	7.84452	7.63942	7.74284
69.m00134_at	0.00405166	2.03496	TGME49_079330	ATP-dependent RNA helicase, putative	7.65724	7.36115	7.60424	7.70934	6.64931	6.1251	6.76286	6.6947	7.19655	7.32386	7.32667
69.m00145_at	0.0067846	2.44795	TGME49_079450	adenylosuccinate synthetase, putative	7.02404	7.24396	6.45238	7.18047	6.00177	5.75036	5.21136	5.77105	6.8634	6.97213	6.67402
69.m00201_at	0.00170395	3.65237	TGME49_079410	hypothetical protein	9.48309	9.50917	9.29929	9.39803	7.12822	7.41934	8.16836	7.49832	9.26977	8.93205	8.80925
70.m00040_at	0.000509022	2.33002	TGME49_079550	hypothetical protein	6.04317	5.98741	6.35091	6.29756	4.9173	5.00662	4.97526	4.89851	5.84156	5.06666	5.86415
72.m00005_at	0.00408418	2.71828	TGME49_080800	snf2-related chromatin remodeling factor SRCA	8.69907	9.01228	8.97824	8.83111	7.59704	7.74442	7.63029	6.77817	8.11861	7.86062	8.0052
72.m00383_at	0.00702643	3.14517	TGME49_080460	hypothetical protein	11.5543	11.7176	11.1958	11.259	9.36051	9.66955	10.6372	9.447	11.2356	11.1087	11.1087
72.m00385_at	0.00355953	2.14517	TGME49_080480	calmodulin, putative	9.9362	9.94044	10.3798	10.4727	8.92389	8.99714	9.34717	9.05662	10.4661	10.3139	10.305
72.m00387_at	0.00358719	2.42361	TGME49_080500	sulfate transporter, putative	11.5701	11.6466	11.3839	11.6262	10.5394	10.1326	10.6286	9.81754	11.0902	11.0902	11.0632
72.m00390_at	0.00148214	3.23807	TGME49_080550	coatomer zeta-2 subunit, putative	8.03542	8.00533	8.12766	8.35206	6.06849	6.82663	6.21167	6.63315	7.98858	7.78428	7.82466
72.m00396_at	0.00176986	2.48179	TGME49_080610	signal recognition particle protein, putative	7.95217	7.81936	7.8682	7.84228	6.49632	6.45932	7.00887	6.27199	8.06756	7.66747	7.66747
72.m00401_at	0.00615871	2.13881	TGME49_080690	hypothetical protein	7.18768	7.30947	7.95646	7.67906	6.13164	6.51642	6.55203	6.54537	7.11482	6.47042	7.33396
72.m00405_at	0.00247683	2.32918	TGME49_080740	signal peptidase, putative	9.8856	9.74327	10.1545	10.0183	8.92891	8.55854	9.01181	8.42302	9.64426	9.43456	9.74979
72.m00683_at	0.000312263	5.81609	TGME49_080680	hypothetical protein	9.61643	9.61397	9.34052	9.7386	6.97401	6.9942	7.40748	6.77363	8.75691	8.73748	8.65044
74.m00427_at	0.00111492	2.68925	TGME49_081440	ATP synthase-related	6.18428	6.59352	6.40767	6.47946	4.91367	4.93597	5.3368	4.76968	5.92939	5.40468	5.82777
74.m00439_at	0.00240092	2.15664	TGME49_081630	hydroxyacylglutathione hydrolase, putative	7.73649	7.66609	7.45627	7.49017	6.26295	6.51037	6.84545	6.29512	7.37194	7.13876	7.31597
74.m00446_at	0.00921843	5.24615	TGME49_081930	surface antigen, putative	9.76784	9.85181	8.08625	8.20554	6.9024	6.29425	6.74519	6.40456	7.46948	7.32386	7.2975
74.m00447_at	0.00560338	2.86036	TGME49_081940	conserved hypothetical protein	7.19757	7.09863	7.12742	7.00782	5.40145	5.79078	4.9562	6.21822	6.19605	6.11469	6.09341
74.m00984_at	0.00084882	3.17902	TGME49_082160	hypothetical protein	8.88106	8.99943	9.10101	8.87668	6.9938	7.17303	7.69583	7.32119	8.59383	8.47246	8.59383
76.m00001_at	0.003756	2.83904	TGME49_083780	glucose-6-phosphate isomerase, putative	10.5711	10.6809	10.3042	10.2061	8.44531	8.76641	9.4036	9.12537	9.98811	9.90378	9.94675
76.m00002_at	0.0051664	3.00508	TGME49_085980	phosphoglucomutase/parafusin related protein	11.2148	11.2551	10.7078	10.7031	9.16422	9.35944	10.0375	8.96997	10.2917	10.2373	10.3362
76.m00003_at	0.0026212	2.31368	TGME49_086470	cAMP-dependent protein kinase catalytic	11.7502	11.7973	11.5806	11.62	10.1998	10.4231	10.9395	10.3449	11.2652	11.1444	11.2447
76.m00011_at	0.0023247	2.08354	TGME49_085760	peptidyl-prolyl cis-trans isomerase H, putative	7.77952	7.50586	7.6161	7.50586	6.69588	6.77894	6.21225	6.48413	7.84792	7.42648	7.68998
76.m00014_at	0.00214117	2.56888	TGME49_086010	hypothetical protein	9.68628	9.61656	9.52562	9.56939	7.80281	8.12389	8.44192	8.58467	8.8359	8.71068	8.90895
76.m00020_at	0.00758991	3.99133	TGME49_087220	conserved hypothetical protein	9.96419	9.95975	9.1568	9.34163	6.73013	7.78441	8.34159	7.57876	8.63276	8.49039	8.62476
76.m01543_at	0.0014033	3.4825	TGME49_083540	hypothetical protein	11.6409	11.6709	11.1749	11.5274	9.72461	9.63478	10.1342	9.32009	10.9662	11.0034	10.8956
76.m01544_at	0.00406809	3.04019	TGME49_083560	hypothetical protein	9.56056	10.0161	9.12416	9.37019	7.84471	8.12331	8.24339	7.44293	8.95161	8.85584	8.86246
76.m01549_at	0.000855707	2.9282	TGME49_083710	longevity-assurance (LAG1) domain-containing	7.9773	8.00144	7.80402	7.98641	6.18673	6.71076	6.54414	6.12748	7.53727	7.19411	7.53727
76.m01551_at	0.00121681	2.21484	TGME49_083730	endomembrane domain-containing protein	8.60515	8.55707	8.6232	8.55092	7.41713	7.23266	7.78458	7.31317	8.58109	8.37989	8.67819
76.m01559_at	0.00672206	2.17611	TGME49_083860	leucine rich repeat protein, putative	7.99039	7.95488	8.23188	8.08773	7.41581	6.72945	7.13105	6.50157	7.8399	7.30324	7.68355
76.m01560_at	0.00402125	2.16836	TGME49_083880	RNA binding motif-containing protein	6.41595	6.37181	6.34194	6.67522	5.01662	5.10138	5.67884	5.54164	6.28662	5.74607	6.37881
76.m01576_at	0.00224401	3.82676	TGME49_084590	hypothetical protein	7.25397	7.45493	6.63797	6.94946	4.74046	5.12879	5.63218	5.0504	6.25866	5.98327	6.31072
76.m01581_at	0.00584826	2.59352	TGME49_084780	hypothetical protein	7.61641	7.61641	7.91031	8.02239	5.78259	6.78612	6.70451	6.39264	8.37437	7.32386	7.71268
76.m01587_at	0.00717392	2.11447	TGME49_085150	hypothetical protein	7.34556	7.47523	7.40735	7.75326	5.95319	6.87782	6.45238	6.37682	6.96286	6.53639	6.94801
76.m01597_at	0.00889763	2.50236	TGME49_085290	hypothetical protein	8.93846	9.07602	9.62373	9.76723	8.2809	7.47677	8.18883	8.16578	9.11462	8.82434	8.9499
76.m01605_at	0.00148214	2.77401	TGME49_085510	hypothetical protein	9.19967	9.19909	9.40496	9.58666	8.04457	7.72687	8.16893	7.56211	9.17794	8.97397	9.28325
76.m01613_at	0.00366089	2.52974	TGME49_085710	hypothetical protein	7.79164	7.67574	8.32151	8.49903	6.84066	6.61789	6.82238	6.65102	7.41716	6.90265	7.34168
76.m01622_at	0.002216	3.64603	TGME49_085830	hypothetical protein	7.91523	8.05229	8.06994	7.89849	5.7362	6.02506	6.82449	5.88489	7.96054	7.5615	8.09171
76.m01628_at	0.00311472	5.31986	TGME49_085930	hypothetical protein	9.36517	9.37265	9.28945	9.6997	6.43797	6.75045	8.01728	6.87571	9.06472	8.94824	8.92597
76.m01635_at	0.00907118	3.27221	TGME49_086030	glutamic acid-rich protein, putative	6.48956	6.96844	6.67954	7.08118	5.62767	5.52101	5.05411	4.17488	5.98327	5.70624	5.98327
76.m01648_at	0.00856868	4.06846	TGME49_086240	leucine-zipper-like transcriptional regulator	8.24358	8.23557	7.82788	8.08809	7.11941	5.5705	6.28645	5.32083	7.68944	7.13067	7.36649
76.m01649_at	0.00162344	3.32322	TGME49_086250	hypothetical protein	8.2459	8.21886	7.52504	8.08916	6.27974	6.07138	6.18718	6.61034	7.20363	7.06221	6.78578
76.m01654_at	0.00514392	2.95588	TGME49_086410	hypothetical protein	6.70761	6.51465	6.29741	6.06255	4.62753	4.7618	5.50859	4.42994	6.34006	5.96344	6.02086
76.m01659_at	0.00155401	6.83924	TGME49_086460	hypothetical protein	8.22364	8.31547	7.44676	8.22106	4.7141	5.91802	5.35366	5.12579	7.24315	6.90264	6.84276
76.m01662_at	0.00253739	2.45338	TGME49_086500	hypothetical protein	10.1535	10.2403	10.6543	10.7446	8.87818	9.13705	9.34822	9.25009	10.3821	9.99711	10.1535
76.m01672_at	0.000202363	4.97135	TGME49_086650	hypothetical protein	8.55962	8.54063	8.40352	8.78947	6.29553	6.38236	6.31935	6.04145	8.10105	7.80732	8.00481
76.m01683_at	0.000400247	2.96815	TGME49_086920	hypothetical protein	8.04014	7.81	7.84737	7.68942	6.13212	6.43219	6.14764	6.39672	7.31414	7.073	7.31414
76.m01691_at	0.00755199	2.37358	TGME49_087180	hypothetical protein	8.84871	9.0438	8.926	8.69813	7.12882	7.76562	8.21844	7.41549	8.40998	8.4364	8.70511
76.m02670_at	0.00150038	4.49914	TGME49_086550	3' exoribonuclease-related	8.57948	8.40342	8.13253	8.54419	6.73307	6.12805	6.44887	5.67102	7.6401	7.58013	7.57162
76.m03395_at	0.00166579	2.70071	TGME49_086480	conserved hypothetical protein	9.34381	9.2342	8.98393	8.66085	7.78475	7.42955	7.56069	7.71445	8.64032	8.24954	8.5895
76.m03674_at	0.0034315	2.5581	TGME49_087480	DEAD/DEAH box helicase domain-containing protein	9.13639	9.2285	8.91363	8.85056	7.84258	7.34599	8.12439	7.39583	9.09833	8.93817	9.02242
8.m00180_at	0.00871885	2.236	TGME49_000280	WD-repeat protein, putative	8.0338	8.07247	7.75058	7.97439	7.07502	6.69979	7.21767	6.19508	7.47567	7.4807	7.28609
8.m00185_at	0.00886709	5.04326	TGME49_000350	subtilase family serine protease, putative	10.5866	10.4599	10.3176	10.248	6.87934	7.71786	8.93684	8.74063	9.64037	9.1338	9.85045
80.m00004_at	0.0072476	3.29091	TGME49_089770	mu1 adaptin, putative	8.88239	8.9767	9.72626	9.74601	7.93151	7.05873	8.08807	7.37911	9.23005	8.9339	9.1116
80.m00011_at	0.00494927	2.08574	TGME49_091680	protein transport protein Sec23, putative	8.74442	8.83335	9.17159	8.99494	7.64531	7.5731	8.21493	8.06872	8.64026	8.0495	8.56362
80.m00051_at	0.005499	2.30092	TGME49_089620	cathepsin C-related	10.7034	10.7288	10.9502	11.1338	9.19889	9.6558	10.1216	9.73106	10.6659	10.609	10.609
80.m00057_at	0.00838855	2.96768	TGME49_090660	polypyrimidine track-binding protein, putative	9.18476	9.13263	9.43459	9.48598	8.13287	7.08018	8.37858	7.36899	9.34958	9.00844	9.073
80.m00063_at	0.00474841	3.44584	TGME49_088360	tryptophanyl-tRNA synthetase, putative	8.90391	9.14078	8.18881	8.51629	7.32632	6.76161	7.17353	6.34893	8.79347	8.28805	8.72773
80.m00073_at	0.00322824	3.24105	TGME49_088860	ruvB-like 2, putative	7.64755	7.48336	8.08855	7.96101	5.57479	6.01745	6.59606	6.20631	7.52308	7.07653	7.69978
80.m00074_at	0.0083187	2.92531	TGME49_088990	hypothetical protein	9.59285	9.79638	8.74155	8.83355	7.5765	7.53179	8.19384	7.46784	8.74155	8.3897	8.92597
80.m00089_at	0.00301698	4.17621	TGME49_090870	patched transmembrane domain-containing protein	9.54956	9.67166	9.42899	9.68077	6.94924	7.08164	8.11845	7.93287	9.15118	8.82409	8.83786
80.m00092_at	0.00240413	2.23799	TGME49_091170	hypothetical protein	7.27846	7.10004	7.12364	6.89258	5.70303	5.87166	6.33031	5.8409	6.47264	5.87166	6.69059
80.m02124_at	0.00106672	2.50388	TGME49_088000	split into 2 hypothetical proteins +TGME49_0880010	7.33494	7.4246	7.0119	7.33893	5.87653	5.90364	5.78403	6.2495	7.04026	6.75179	6.72331
80.m02125_at	0.00384403	3.7334	TGME49_088030	hypothetical protein	10.6085	10.5613	10.5485	10.7579	8.40641	8.97632	9.41579	8.07576	10.1888	9.96524	10.0245
80.m02126_at	0.000631896	2.94211	TGME49_088040	hypothetical protein	8.83786	8.64806	8.59186	8.6585	7.07155	6.923	7.47975	7.03459	8.25379	8.0407	8.2216
80.m02155_at	0.00038895	2.6643	TGME49_088530	proliferating-cell nucleolar antigen p120	8.03063	8.05583	7.82514	7.81548	6.69385	6.41952	6.5659	6.39279	7.88924	7.62226	7.81046
80.m02174_at	0.000446029	4.44706	TGME49_088840	hypothetical protein	8.45776	8.6045	8.2007	8.24989	5.88913	6.21886	6.52153	6.27192	7.89829	7.89829	7.68505
80.m02180_at	0.00590661	2.71283	TGME49_088940	hypothetical protein	6.69376	6.90708	5.98466	5.99845	5.18589	4.83722	5.09777	4.70385	5.3575	5.31461	5.36728
80.m02181_at	0.00480823	4.25628	TGME49_088950	hypothetical protein	8.76702	9.01336	8.81432	9.41082	7.33078	6.32705	7.60579	6.38351	8.34934	8.31204	8.19355
80.m02186_at	0.00647864	2.5973	TGME49_089010	conserved hypothetical protein	7.95978	7.5555	7.39108	7.43629	6.11552	6.71342	6.35948	5.64618	6.84841	6.50674	6.51335
80.m02222_at	0.000421534	3.13309	TGME49_089550	periodic tryptophan protein 1 (PWP1)-related	9.03024	9.00774	8.77566	8.80134	7.43071	7.33735	7.27476	6.98183	8.67679	8.41107	8.75285
80.m02232_at	0.00779622	2.64058	TGME49_089670	SNM1 protein	7.70189	7.72825	6.92191	7.0705	5.43809	6.31356	6.02945	6.03804	7.14192	6.63	7.1128
80.m02235_at	0.00690618	2.44582	TGME49_089700	hypothetical protein	9.56618	9.46296	10.0503	9.85898	8.2809	8.54055	8.96635	7.9893	9.45536	9.33164	9.40074
80.m02237_at	0.00487196	2.90077	TGME49_089730	vacuolar protein sorting 18, putative	6.48281	6.51465	6.69143	6.71086	4.89748	4.75231	5.82961	4.7746	6.63345	5.80086	6.35363
80.m02259_at	0.00181353	3.6379	TGME49_090000	hypothetical protein	8.39166	8.53042	7.60795	8.41963	6.59108	6.26819	6.44107	6.19691	7.59747	7.32814	7.14528
80.m02265_at	0.00224401	2.73609	TGME49_090240	conserved hypothetical protein	7.20029	7.14602	7.66051	7.78426	6.27698	5.80344	6.03979	5.8624	6.80299	6.48457	6.80299
80.m02277_at	0.00650182	2.9522	TGME49_090620	trichohyalin-related	8.26265	8.52598	8.93036	8.8857	6.53038	6.95458	7.14804	7.72451	8.69441	8.39022	8.52666
80.m02284_at	0.00499552	3.88969	TGME49_090700	hypothetical protein	9.32639	9.13861	9.71631	9.77136	6.62355	7.89507	7.85192	7.7435	9.09748	8.75544	8.95453
80.m02287_at	0.00515268	2.29504	TGME49_090730	conserved hypothetical protein	7.88121	7.6623	7.94441	8.14726	6.65029	7.24113	6.55354	6.39614	7.79343	7.30527	7.83049
80.m02289_at	0.00640059	3.21901	TGME49_090850	WD-40 repeat protein, putative	10.101	9.98927	9.86466	10.1592	8.19906	7.80126	9.23163	8.13569	9.74732	9.52717	9.62098
80.m02290_at	0.00919608	3.29907	TGME49_090860	L-type amino acid transporter-related	9.5348	9.65959	8.73388	8.92949	6.90315	7.25284	8.22613	7.58742	8.65986	7.89215	8.17652
80.m02292_at	0.00314335	2.86002	TGME49_090880	DnaJ domain-containing protein	7.44071	7.43104	6.80234	6.80468	5.55933	5.91868	5.28153	5.65513	6.16618	6.2988	6.51215
80.m02304_at	0.0046511	2.17747	TGME49_091020	IQ calmodulin-binding motif domain-containing	7.28656	7.50425	8.00804	8.02269	6.58674	6.699	6.56723	6.47795	7.50875	7.06776	7.2423
80.m02308_at	0.0028289	3.05077	TGME49_091080	TATA-box binding protein, putative	10.1746	10.1413	9.95774	9.96005	8.49834	8.63334	8.8472	7.81803	9.85236	9.64353	9.95736
80.m02317_at	0.00517681	3.08478	TGME49_091300	RER1 protein, putative	7.97543	8.03797	7.97593	7.6332	6.51034	6.87555	6.11947	5.61649	7.3674	7.35103	7.3674
80.m02318_at	0.00474841	2.78591	TGME49_091310	vacuolar ATP synthase 22 kDa proteolipid	8.32817	8.29053	8.62506	8.52581	7.50594	6.53851	6.58767	7.22485	8.32364	8.00112	8.39627
80.m02322_at	0.0037282	4.81271	TGME49_091600	interferon gamma-inducible protein 30	8.27156	8.26123	7.681	7.90432	5.30532	5.39384	6.71224	5.63932	7.41632	6.97751	7.12882
80.m02323_at	0.00177136	2.7778	TGME49_091620	hypothetical protein	7.73029	7.55344	7.52565	7.82049	5.85456	6.56342	6.3537	5.96244	7.36234	7.18923	7.24569
80.m02328_at	0.00508147	2.5274	TGME49_091670	RNA helicase, putative	5.86865	5.76932	5.74909	5.81341	4.98789	3.86572	4.56729	4.42896	5.46655	5.0387	5.40504
80.m02338_at	0.0023733	2.2924	TGME49_091900	hypothetical protein	7.95661	8.1966	7.90869	8.19062	7.10588	6.4595	6.89017	7.00954	7.88256	7.35727	7.72683
80.m02366_at	0.00370763	4.74188	TGME49_092330	hypothetical protein	7.43497	7.4429	8.14248	8.14248	5.54854	6.34963	5.20315	5.07967	7.18108	5.74808	6.60851
80.m03951_at	0.00330986	3.25726	TGME49_091030	hypothetical protein	9.29539	9.54203	9.11003	9.26962	8.23971	7.36855	7.67457	7.11959	8.76526	8.69876	8.62073
80.m03958_at	0.0029618	2.83002	TGME49_092110	formate/nitrite transporter, putative	8.31928	8.47551	8.19103	8.39333	6.30844	6.88147	7.32959	6.8564	8.02554	7.36493	7.7392
80.m03965_at	0.00585881	2.85233	TGME49_091860	hypothetical protein	10.1351	10.0927	9.21151	9.31508	8.30612	8.15861	8.39961	7.84152	9.71614	9.56436	9.58971
80.m03969_at	0.00183921	2.49182	TGME49_090150	BNR/Asp-box repeat domain-containing protein	7.62505	7.76546	8.11835	7.9699	6.19407	6.69522	6.59822	6.72245	7.86604	7.73087	7.62505
80.m03987_at	0.00631077	2.75107	TGME49_088600	hypothetical protein	7.70943	7.59966	7.85647	7.91593	5.59041	6.26819	6.59881	6.78411	7.44648	7.33093	7.45026
80.m03988_at	0.00793852	2.57334	TGME49_088570	hypothetical protein	8.43644	8.19668	8.52719	8.6321	6.91662	7.17696	7.73641	6.50787	8.49544	8.0449	8.34119
80.m03989_at	0.00855268	2.56861	TGME49_088550	hypothetical protein	9.80315	9.79944	9.80653	9.83389	8.10584	8.37768	9.25965	8.05589	9.45459	9.46042	9.34792
80.m03991_at	0.00255298	2.41635	TGME49_089820	TBC domain-containing protein	6.97785	7.14187	7.29857	7.28574	5.46951	6.15068	6.13428	5.85825	6.99115	6.07852	6.53361
80.m03992_at	0.00921843	3.2854	TGME49_090260	hypothetical protein	9.15956	8.90151	8.34468	8.52453	6.69598	6.69342	7.94571	6.73089	8.38892	8.24824	8.73625
80.m03996_at	0.00793852	2.26128	TGME49_089880	hypothetical protein	9.97744	10.181	9.65777	9.65981	8.52709	8.45026	9.2845	8.50555	9.84271	9.69333	9.82709
80.m05017_at	0.00985349	4.67974	none	hypothetical protein	11.0579	11.1111	9.9012	10.0644	7.69747	8.65991	9.1357	7.73582	9.87261	9.81749	9.90488
80.m05029_at	0.000621107	5.59196	TGME49_089090	conserved hypothetical protein	8.99994	9.20878	9.15811	9.26355	6.08398	6.75358	6.88806	6.97133	8.6041	8.58404	8.6041
80.m05042_at	0.00670492	2.37421	TGME49_090570	conserved hypothetical protein	7.94561	7.61641	7.6623	7.58654	6.40964	6.4346	7.03024	5.94659	7.40226	7.30862	7.40226
80.m05396_at	0.00351922	4.32712	TGME49_089050	serine/threonine-protein kinase, putative	10.5998	10.5687	9.78383	9.81912	7.50442	7.96572	8.60978	8.23786	9.57523	9.37707	9.37707
83.m00006_at	0.00257447	2.59084	TGME49_093900	hypothetical protein	6.37689	6.49199	6.66844	6.81837	4.8547	5.59097	5.04889	5.36744	5.49968	5.55879	5.72037
83.m00011_at	0.00682985	2.26753	TGME49_094990	split into 2 genes:TGME49_094990&094980 both hypothetical protein	7.95255	8.12179	8.17736	8.29673	6.91732	6.91879	7.51507	6.47276	8.00285	7.89029	8.18744
83.m00012_at	0.00771702	4.38841	TGME49_095030	hypothetical protein	9.37891	9.40838	7.90213	8.0546	6.3698	6.38906	6.81833	6.63204	7.92811	7.0433	7.76011
83.m00014_at	0.00723198	2.28444	TGME49_094780	hypothetical protein	7.90303	7.81198	7.61379	7.82811	6.83565	6.01158	6.50722	7.03508	7.32222	6.75452	7.32882
83.m01186_at	0.00896503	2.66456	TGME49_092950	hypothetical protein	8.62467	8.81201	8.98375	9.17671	7.53981	6.83108	7.42389	8.14677	8.24587	8.19764	8.34119
83.m01188_at	0.00355087	2.11713	TGME49_092970	hypothetical protein	7.60294	7.89278	7.49684	7.33692	6.22168	6.60687	6.7668	6.40571	7.19238	6.85101	7.14743
83.m01212_at	0.000569652	2.04171	TGME49_093440	variably charged protein X-C-related / VCX-C	11.142	11.1237	11.1517	11.3703	10.2041	10.2013	10.2713	9.99187	10.5987	10.6437	10.6932
83.m01215_at	0.00418339	2.99444	TGME49_093470	hypothetical protein	10.3605	10.2565	10.2331	10.3183	8.10081	8.81672	9.33495	8.5867	9.90009	9.89175	9.90009
83.m01225_at	0.00439174	2.93736	TGME49_093600	hypothetical protein	7.38815	7.35464	7.44804	7.49441	6.4433	5.51616	6.14505	5.36265	6.77255	6.35699	6.83717
83.m01228_at	0.00511393	3.20997	TGME49_093630	hypothetical protein	7.20519	7.20274	7.22301	7.35351	4.85315	5.39384	6.22672	5.7805	6.77757	6.29027	6.64914
83.m01229_at	0.00988839	2.54537	TGME49_093660	hypothetical protein	8.77421	8.56671	8.67059	8.71632	7.61284	7.23782	7.90624	6.57944	8.66217	8.04836	8.35903
83.m01230_at	0.00464626	2.44647	TGME49_093670	transcription elongation factor (TFIIS)	8.9659	9.09186	9.56833	9.50952	7.66184	8.19078	8.32782	7.79235	8.8848	8.79508	8.9988
83.m01231_at	0.00671934	2.27319	TGME49_093680	hypothetical protein	9.43899	9.4399	9.15304	9.18591	7.72915	8.22048	8.67087	7.85846	9.56488	9.16336	9.4204
83.m01244_at	0.00256347	2.22193	TGME49_093860	hypothetical protein	8.74259	8.43231	8.52143	8.29767	7.13356	7.24953	7.72292	7.28074	8.54984	8.0557	8.59006
83.m01250_at	0.00211212	2.78184	TGME49_094050	hypothetical protein	10.1874	10.3834	9.81561	9.98381	8.68619	8.45015	8.99817	8.33155	9.93305	9.85784	9.81561
83.m01253_s_at	0.00419782	2.79472	TGME49_094190	hypothetical protein	8.62433	8.64404	8.26734	8.48156	6.48711	6.82048	7.47891	7.29995	8.33382	7.8402	8.26734
83.m01255_at	0.00120802	3.14564	TGME49_094220	hypothetical protein	7.6737	7.58399	7.8971	7.8356	5.80917	6.43083	5.82505	6.31193	7.22392	6.87478	6.99194
83.m01262_at	0.00225463	2.42685	TGME49_094350	DEAD/DEAH box helicase, putative	8.45686	8.67392	8.80417	8.5674	7.23267	7.12601	7.80049	7.22686	8.39594	8.08927	8.47058
83.m01263_at	0.00261892	3.102	TGME49_094360	ubiquitin carboxyl-terminal hydrolase, putative	8.55498	8.61782	8.81872	8.94063	7.01899	6.64366	7.66005	7.07666	8.31828	8.26296	8.06429
83.m01311_at	0.00499718	4.52882	TGME49_095100	hypothetical protein	7.90204	7.97717	8.58267	8.4645	6.15944	5.77734	6.93063	5.34244	7.887	7.71829	7.71829
83.m02695_at	0.00379874	2.81069	TGME49_093040	hypothetical protein	9.00488	8.9418	8.85532	8.87877	6.92657	7.31611	8.05074	7.42365	8.7046	8.35014	8.67903
86.m00357_at	0.00365497	2.90745	TGME49_095310	tubulin-specific chaperone A, putative	9.40705	9.3955	9.764	9.90281	8.53369	7.90019	8.26364	7.6128	9.30552	9.19434	9.22011
86.m00370_at	0.00432637	3.68136	TGME49_095420	hypothetical protein	10.9831	10.943	10.4803	10.7063	8.74404	8.6921	9.73465	8.4209	10.1587	10.1103	10.0153
86.m00378_at	0.00596769	2.28102	TGME49_095630	hypothetical protein	9.10711	9.09217	9.52046	9.50878	8.11326	7.65532	8.54212	8.15909	9.5608	9.10985	9.49609
86.m00383_at	0.0042508	5.4256	TGME49_095690	ubiquinone/menaquinone biosynthesis methyltransferase	8.80451	8.76827	7.87445	8.46749	6.21626	5.53052	5.48977	6.91904	8.00625	7.88489	7.87445
86.m00397_at	0.00989907	2.86129	TGME49_096010	phosphatidylinositol 3- and 4-kinase domain	9.09954	9.10252	9.15955	9.19478	6.89876	7.57574	8.4806	7.53463	9.21735	8.77684	9.03086
86.m00653_at	0.00982181	3.40614	TGME49_095970	hypothetical protein	10.1683	10.0983	9.49159	9.62568	7.32632	8.19842	8.94248	7.84408	9.90651	9.54667	9.56595

## Sheet: wild type and IFNKO
Probesets	Corrected p-value	Fold change: in vitro/wt	Fold change: in vitro/IFNKO	GeneID (ToxoDBv5)	Description of parasite gene v4	in vitro 1	in vitro 2	in vitro 3	in vitro 4	in vivo1	in vivo2	in vivo3	in vivo 4	IFNKO 1	IFNKO 2	IFNKO 3
113.m00789_at	0.00713501	2.722	2.41513	TGME49_097650	serine/threonine protein phosphatase, putative	7.39804	7.66735	7.12721	7.33295	5.21326	6.3803	5.95059	6.20273	6.45838	5.6372	6.23227
113.m00804_at	0.0019316	5.04871	2.50707	TGME49_097900	hypothetical protein	7.9611	8.34769	7.51004	7.72942	4.9259	5.87313	5.95169	5.45388	6.61046	6.50653	6.56619
113.m01283_at	0.0018999	5.0955	3.61044	TGME49_097850	aminotransferase domain-containing protein	10.9681	10.9582	10.2125	10.504	8.49887	7.97344	8.87658	7.897	8.93003	8.66399	8.83154
145.m00598_at	0.00405166	7.73963	3.49647	TGME49_099790	hypothetical protein	10.6987	10.3812	10.0177	10.368	6.14492	7.51079	8.30266	7.69807	8.5019	8.47402	8.7055
20.m00355_at	0.00251984	4.92059	2.99798	TGME49_001520	protein phosphatase 2C, putative	7.96422	7.93573	8.6574	8.42332	6.12337	5.55696	6.61028	5.49472	6.48456	6.67273	6.82623
20.m00387_at	0.00432637	3.41666	2.26268	TGME49_004050	subtilase family serine protease, putative	11.4855	11.5237	10.7711	11.0717	9.06455	9.02333	9.91387	9.75993	10.1773	9.76437	10.1632
20.m03646_at	0.00405166	3.56705	2.86691	TGME49_001130	protein kinase-related	7.59063	7.83249	7.44172	8.13645	6.18978	5.64656	5.35325	6.47276	6.48681	5.96708	6.23858
20.m03650_at	0.00643362	2.48132	2.10062	TGME49_001210	hypothetical protein	6.90765	6.9652	7.04413	7.26927	5.78746	5.16387	6.30008	5.69041	6.05036	5.91579	5.96108
20.m03681_at	0.000922818	9.62642	3.35057	TGME49_001850	peroxisome biogenesis factor 7, putative	11.1486	11.1526	10.3689	10.7398	7.32632	7.22116	8.34722	7.44728	9.31191	9.03835	8.97401
20.m03764_at	0.00717237	2.88298	2.53046	TGME49_003050	cell wall protein-related	6.95654	7.53684	6.92092	6.96342	4.81759	5.8524	5.65439	5.9431	5.85355	5.89509	5.51646
20.m03774_at	0.000752304	2.74898	2.00231	TGME49_003160	conserved hypothetical protein	8.66026	8.75821	8.51347	8.68442	6.93394	7.46851	7.3199	7.05843	7.86996	7.27269	7.81462
20.m03779_at	0.00744055	3.61714	3.05693	TGME49_003230	hypothetical protein	8.80393	8.80393	7.58107	8.44148	6.30965	7.08643	6.08689	6.72802	6.82583	6.69834	6.86239
20.m03791_at	0.00627575	4.90087	2.25458	TGME49_003360	hypothetical protein	9.21102	9.34459	8.98747	8.95586	6.71136	6.03753	8.00261	6.57529	8.21754	7.54329	8.0948
20.m03857_at	0.00366576	4.02808	2.93318	TGME49_004320	hypothetical protein	8.64002	8.58301	7.84946	8.07028	6.20289	5.65968	6.84434	6.3955	6.68474	6.64222	6.87272
20.m03860_at	0.00258345	5.60138	4.37779	TGME49_004360	subtilase family serine protease, putative	7.59894	7.26577	7.02756	7.24102	4.21956	4.25289	5.4027	5.31502	5.45027	4.85615	5.15294
20.m05898_at	0.00309926	5.85364	3.57246	TGME49_005530	hypothetical protein	8.93207	8.49897	7.8712	8.40386	5.58687	5.82349	6.75059	5.34782	6.92092	6.32097	6.52694
25.m00212_at	0.00162915	2.79111	2.02911	TGME49_008740	microneme protein, putative	8.85027	9.04401	8.92983	9.17522	7.51923	7.51486	7.91313	7.12876	8.1377	7.70237	8.09689
25.m01803_at	0.000355415	4.0109	2.32588	TGME49_008350	RNA recognition motif-containing protein	8.14896	8.00301	8.21003	8.23547	6.47935	6.08336	5.90369	6.11538	7.23755	6.6832	6.87404
25.m02917_at	0.00178207	4.5982	2.48332	TGME49_007590	T-cell activation protein phosphatase 2	7.07212	6.91224	7.33144	7.49549	4.6431	4.75412	5.69052	4.91927	5.94635	5.90071	5.82461
27.m00090_at	0.00662607	3.6274	2.17626	TGME49_011280	hypothetical protein	7.53868	7.63587	7.68878	8.27813	5.16065	6.52991	6.31213	5.70302	6.61423	6.59009	6.78622
31.m00871_at	0.000438816	14.0472	17.3199	TGME49_013050	hypothetical protein	10.2249	10.2428	9.62502	10.7774	6.12208	6.32819	6.33031	6.84076	5.98243	6.22486	6.10225
31.m00894_at	0.00443565	2.38119	2.09323	TGME49_013820	hypothetical protein	8.4314	8.85351	8.7345	8.68897	6.90735	7.45031	7.8052	7.53877	7.81279	7.47942	7.54188
328.m00001_x_at	0.000185169	298.085	364.471	NONE	stress-induced protein OsmC-related	11.2642	11.2058	12.0598	11.9194	3.68657	3.05591	3.13605	3.69225	3.04154	3.33554	2.93078
37.m00005_at	0.000303724	6.08175	2.38044	TGME49_017530	hypothetical protein	9.5673	9.36177	9.27057	9.90759	6.84876	7.11128	6.95766	6.77159	8.45703	8.0633	8.30639
37.m00011_at	0.00282823	4.53247	5.02587	TGME49_017610	hypothetical protein	8.8654	9.03408	8.1269	8.03285	6.71028	6.52353	5.89396	6.21026	6.1994	5.98283	6.37406
37.m00739_at	0.00064884	5.4599	7.86761	TGME49_017400	hypothetical protein	7.34374	7.51982	7.49529	7.03069	5.39068	4.79643	4.52999	4.87694	4.10844	4.74403	4.2619
38.m01893_at	0.00352011	2.7354	2.1266	TGME49_019120	hypothetical protein	7.12371	7.44696	6.77937	6.71244	5.74224	5.24942	5.39599	5.86781	6.10448	5.73169	5.94504
39.m00613_at	0.00562881	3.43438	2.30758	TGME49_020390	hypothetical protein	8.20921	8.17013	7.91722	8.05852	5.46936	6.44825	6.33372	6.98354	7.04788	6.8525	6.74679
39.m00618_at	0.000400247	4.54305	3.87588	none	hypothetical protein	9.45346	9.71799	9.50331	9.58216	7.77894	7.23573	7.34514	7.16247	7.87669	7.34572	7.60671
41.m01274_at	0.000846033	10.8535	4.21021	TGME49_020950	hypothetical protein	9.8763	9.90476	10.1774	10.2118	5.78995	6.48198	7.2543	6.8837	8.22555	7.65494	8.02554
41.m01295_at	0.00224429	5.52521	2.55792	TGME49_021410	actin-related	9.06224	9.18272	8.62395	9.11476	6.80659	5.87096	7.22796	6.21404	8.03523	7.24388	7.64373
41.m02951_at	0.00539887	2.25766	2.65237	none	hypothetical protein	7.94555	7.96016	8.14406	7.72994	6.31031	6.86759	7.22473	6.67777	6.46969	6.95672	6.18653
42.m03289_at	0.00133235	5.48156	4.23152	TGME49_023560	hypothetical protein	7.66747	7.56089	6.98523	7.2718	4.78684	4.54344	4.76637	5.5704	4.87299	5.55675	5.44079
42.m03338_at	0.00192325	2.68069	3.22664	TGME49_024170	SRS domain-containing protein	6.25971	6.70707	6.22448	6.43646	4.80626	5.23772	5.21438	4.67895	4.45909	5.07888	4.61272
42.m03493_at	0.00151815	3.25171	2.12376	TGME49_026380	hypothetical protein	8.23197	8.39213	8.72238	8.84765	6.51034	6.84864	6.85673	7.17361	7.6014	7.25174	7.53259
42.m03544_at	0.000326954	3.91468	2.76243	TGME49_026990	hypothetical protein	7.18638	6.99246	7.20768	7.29993	5.37279	5.32852	4.90501	5.20456	5.58966	5.85692	5.67045
44.m02599_at	0.000634286	6.02027	2.33407	TGME49_030470	protein kinase-related	10.7177	10.6841	10.1183	10.543	7.97157	8.19412	8.11428	7.42368	9.2968	9.32676	9.25512
44.m02613_at	0.00207807	6.05167	2.0031	TGME49_030680	lipin, putative	9.01713	8.95942	8.92243	9.13013	6.0314	5.79691	7.30462	6.50683	8.17053	7.74227	8.10233
44.m02646_at	0.00229827	6.28914	3.1003	TGME49_031180	hypothetical protein	9.17907	9.19224	8.10861	8.4172	6.00483	5.87313	6.72058	5.68713	7.08278	6.88717	7.30568
44.m02812_at	0.00924468	3.34959	3.04946	TGME49_033770	Ca2+-ATPase, putative	8.10165	7.7898	7.54964	7.27381	5.02076	6.33173	6.43207	5.9544	6.10195	6.16122	5.94735
44.m04667_at	0.00156425	3.63664	3.01425	TGME49_032370	CW-type zinc finger domain-containing protein	7.04455	7.12225	7.67024	7.74775	5.26926	5.84543	5.48303	5.53665	5.87326	5.99093	5.549
44.m04672_at	0.000603357	2.88784	2.41314	TGME49_031920	sepiapterin reductase, putative	8.38483	8.47158	8.71995	8.90996	7.05727	7.02231	7.06528	7.22148	7.36979	7.19596	7.48625
44.m05913_at	0.00130417	3.60454	2.11425	TGME49_029220	conserved hypothetical protein	7.6664	7.91542	7.2283	7.3553	5.90039	5.5984	5.9087	5.35867	6.5437	6.51295	6.32697
46.m00021_at	0.000758351	5.92983	2.26894	TGME49_037560	nifU protein, putative	9.04637	9.05484	9.63758	9.43203	7.12882	6.88147	6.28058	6.60799	8.33835	7.69521	8.2985
46.m01725_at	0.00245258	3.35463	2.50201	TGME49_036990	soraphen polyketide synthase-related	9.64436	9.88283	9.54583	9.9303	8.55661	7.47992	7.97296	8.0092	8.52201	8.33957	8.42165
46.m02899_at	0.00282823	3.08668	3.73444	TGME49_035500	hypothetical protein	8.76102	8.88195	8.25645	8.26072	7.03559	6.81472	7.2881	6.51751	6.4207	6.73514	6.76159
49.m00038_at	0.00129883	8.82102	2.14491	TGME49_041180	hypothetical protein	7.68116	7.50586	7.78269	8.01233	3.77608	5.16501	5.09777	4.37941	6.9572	6.2298	6.74679
49.m00039_at	0.00135059	3.77322	2.49165	TGME49_040960	hypothetical protein	7.39297	7.29493	7.66408	7.85699	5.84464	5.44973	5.99303	5.2584	6.30871	6.03592	6.3608
49.m03124_at	0.00115494	2.66182	2.02757	TGME49_039010	hypothetical protein	8.25366	8.57272	7.94924	8.38302	7.07145	6.76307	6.89629	6.77817	7.33609	7.21979	7.25385
49.m03198_at	0.00197007	4.22873	2.3777	TGME49_040300	LSD1 zinc finger-related	8.40948	8.35955	7.97673	8.29409	5.60688	6.69844	5.9526	6.46102	7.11758	6.9563	6.9573
49.m03341_at	0.00668912	2.85941	2.11587	TGME49_043380	hypothetical protein	7.94534	7.73185	7.36994	7.7295	6.78056	5.52668	6.07381	6.33271	6.69262	6.78056	6.36553
49.m03400_at	0.000421534	25.792	5.41783	TGME49_044260	hypothetical protein	9.58433	9.49374	8.85085	9.48594	4.39274	4.54363	5.50751	4.21557	7.0016	6.59706	7.14934
49.m05712_at	0.00682134	2.86829	2.26184	TGME49_043720	peroxisomal biogenesis factor 11 (PEX11) domain	7.89422	7.78244	7.04881	7.49436	5.43427	6.48688	6.1675	6.0504	6.58847	6.10411	6.4398
50.m03090_at	0.00122293	5.46067	5.12126	TGME49_045880	hypothetical protein	9.31725	9.52838	8.49237	8.95202	6.81255	6.22576	6.75045	6.70495	6.85478	6.95481	6.33843
50.m03113_at	0.00103624	3.27166	2.04427	TGME49_046490	hypothetical protein	8.74615	8.5505	8.48283	8.61012	6.45709	6.8239	7.22302	7.04549	7.78125	7.15199	7.7642
50.m03214_at	0.00144749	4.76121	2.32666	TGME49_048190	hypothetical protein	8.68352	8.77898	8.44343	8.62387	6.18668	6.28148	7.09102	5.96532	7.41338	7.48332	7.34587
50.m03282_at	0.00106606	2.80009	3.16711	TGME49_049190	hypothetical protein	8.38411	8.73972	8.62244	8.37697	7.41231	6.91572	6.97554	6.87777	6.84189	7.12343	6.6376
50.m03386_at	0.00218978	5.91069	2.97113	TGME49_051170	hypothetical protein	8.4171	8.48649	7.38633	8.19041	6.19058	5.30868	5.18583	5.54193	6.69735	6.48634	6.46352
50.m05602_at	0.00468573	3.0984	2.80935	TGME49_045430	hypothetical protein	6.98838	7.43418	7.35048	7.75504	5.92511	5.28963	5.48303	6.30421	5.88483	5.4863	6.30421
50.m05666_at	0.00313996	2.85721	2.25921	TGME49_050020	hypothetical protein	9.42579	9.40941	8.83872	8.63661	7.83703	7.59277	7.42101	7.40129	7.97226	7.74227	7.9909
50.m05692_at	0.00100758	2.73749	2.06671	TGME49_051710	hypothetical protein	7.28677	7.11371	6.76504	6.89252	5.79108	5.50079	5.59313	5.36163	6.22878	5.87762	5.79513
52.m01527_s_at	0.00300408	4.44046	4.82721	TGME49_052060	hypothetical protein	8.73912	9.11133	8.16394	7.94605	6.3474	5.87313	6.62774	6.50934	6.51465	5.8546	6.28752
52.m01621_at	0.00285687	4.16969	4.33264	TGME49_053930	conserved hypothetical protein	8.08547	8.2446	7.59146	7.24994	5.81923	5.64656	6.18195	5.28397	5.55784	5.81911	5.65591
52.m01628_at	0.00201537	3.93966	2.0342	TGME49_054010	serine carboxypeptidase S28, putative	7.96225	8.01341	8.26664	8.13289	5.82012	5.79236	6.01724	6.83319	7.08798	7.13375	6.98627
52.m03444_at	0.000421534	3.37961	2.28531	TGME49_053720	hypothetical protein	7.25243	7.16886	7.3557	6.98834	5.51896	5.15213	5.60914	5.45767	6.34006	5.81096	5.84581
52.m03454_at	0.00426019	3.00278	2.37686	TGME49_052180	hypothetical protein	7.31827	7.72996	7.38319	7.50965	5.5383	6.12511	6.47859	5.45388	6.65884	6.21322	5.83658
541.m01144_at	0.000747284	6.86447	2.62106	TGME49_104960	hypothetical protein	8.38095	8.63313	7.87153	8.22066	5.26486	5.08096	5.8776	5.76626	7.06476	6.40686	7.18764
541.m02514_at	0.00185447	9.37186	9.80943	TGME49_105890	conserved hypothetical protein	10.7152	10.9511	10.753	10.2004	7.07775	6.9258	8.52405	7.17875	7.52655	7.15611	7.39959
55.m00276_at	0.00293914	2.20197	2.58091	TGME49_055210	peroxisomal-type ATPase, putative	9.33704	9.29463	9.32331	9.03824	8.4886	7.80384	7.96102	8.18456	7.68379	7.64448	8.31301
55.m05023_at	0.00997403	2.30531	2.7275	TGME49_062970	zinc finger (CCCH type) protein, putative	7.46525	7.67876	7.10614	7.18053	5.63587	6.68845	5.99301	6.29352	6.05013	5.9585	5.72164
55.m05050_at	0.00208236	3.53066	2.06872	TGME49_063290	rhomboid family domain-containing protein	8.41344	8.30192	8.03037	8.17414	6.51912	5.83602	6.90141	6.38357	7.2248	7.2248	7.09408
55.m10274_at	0.00924839	2.25884	2.76917	TGME49_057360	hypothetical protein	7.25123	7.47755	6.76708	7.43513	5.88326	5.96485	5.77741	6.60313	5.97644	5.75967	5.55377
57.m03095_at	0.00478327	2.78573	2.48493	TGME49_066380	hypothetical protein	7.32213	7.38052	6.35329	7.19201	5.61903	5.66444	5.70152	5.35074	5.81229	5.69295	5.74111
583.m05264_at	0.00157913	2.83997	2.28806	TGME49_108960	peroxisome biogenesis factor 1 (Peroxin-1)	8.69876	8.82304	8.50642	8.60339	6.7047	7.28732	7.14825	7.46784	7.46718	6.94815	7.97599
583.m05408_at	0.00412237	2.81077	2.67205	TGME49_111100	zinc finger (CCCH type) protein, putative	9.78081	10.0989	8.97632	9.66927	8.14711	8.08444	8.28188	8.04802	8.41199	8.14372	8.08444
583.m05431_at	0.00419707	2.97784	2.06537	TGME49_111410	U3 small nucleolar ribonucleoprotein protein	6.37998	6.6871	6.19006	6.91559	5.55241	4.83258	4.63896	4.85172	5.25831	5.66467	5.56736
583.m05548_at	0.0037037	5.62964	2.2029	TGME49_113360	hypothetical protein	8.56927	8.64978	8.45533	8.65117	5.70869	6.39675	7.0045	5.24344	7.70449	7.27407	7.34739
583.m05576_at	0.00232861	2.36139	2.33763	TGME49_113760	hypothetical protein	7.88333	8.10148	7.93282	8.10007	6.31986	7.03768	6.79285	6.90876	7.11967	6.61064	6.60781
583.m05670_at	0.00166579	2.57226	2.01622	TGME49_115290	hypothetical protein	8.94403	8.85944	8.93311	9.34807	7.41287	7.54242	7.96593	7.71129	8.1687	7.83424	8.02558
583.m05718_at	0.00374065	3.76235	2.03696	TGME49_115940	hypothetical protein	6.38145	6.58754	5.93753	6.21658	4.03391	3.89053	5.07657	4.47555	5.61109	4.97894	5.17304
583.m09092_s_at	0.00224429	4.81108	4.49887	NONE	hypothetical protein	9.4053	9.31811	8.77839	9.10305	6.13441	7.27432	6.87031	7.26037	7.00682	6.61527	7.32286
583.m09162_at	0.00424895	2.41088	3.32861	TGME49_115790	hypothetical protein	6.11578	6.00809	6.26988	5.6973	4.74175	4.29962	4.86372	5.10772	4.33457	4.15677	4.37219
583.m11484_at	0.00818965	2.36143	2.25058	none	hypothetical protein	7.85145	7.76162	7.66857	7.71058	6.07514	7.17394	6.59113	6.19335	6.73705	6.10921	6.88702
59.m00024_at	0.000865227	5.74167	3.43581	TGME49_069050	adenylate kinase-related	8.66081	8.46242	7.66233	7.94467	5.64823	5.45736	5.77562	5.76315	6.67617	6.35945	6.17009
59.m03378_at	0.00686791	3.13465	2.08978	TGME49_068320	hypothetical protein	7.97588	7.80666	7.48892	7.79099	6.74792	5.52111	6.49718	5.70302	6.8283	6.86084	6.41764
59.m03420_at	0.00183066	4.89332	3.41782	none	hypothetical protein	8.28829	8.18719	7.30531	7.67169	5.1498	5.82557	5.85155	5.46229	6.0756	5.99424	6.20029
59.m03459_at	0.0018672	6.29442	2.22039	TGME49_069600	biotin carboxyl carrier protein, putative	8.95397	8.94033	8.96448	9.34436	7.01899	5.79821	6.8634	5.90625	7.77611	7.98219	7.94161
59.m03587_at	0.000303724	5.35581	2.07897	TGME49_071750	calmodulin-related	8.81255	8.86111	8.64739	8.95521	6.51034	6.19803	6.71684	6.16662	7.84701	7.69066	7.75191
59.m07739_at	0.00335799	4.65352	2.06168	TGME49_071010	conserved hypothetical protein	8.25072	8.35156	8.48717	8.6693	5.87429	5.68957	7.14585	6.17576	7.46385	6.99182	7.73193
63.m00154_at	0.000534822	4.1028	2.12085	TGME49_075450	hypothetical protein	8.45924	8.68651	8.61061	8.69244	6.86466	6.15244	6.59348	6.69179	7.72377	7.31272	7.5462
641.m01493_at	0.000761137	3.56912	2.7018	TGME49_118590	mrp protein, putative	6.71339	6.64439	6.53031	6.67096	4.38197	5.07878	4.71518	5.04085	5.23982	4.96474	5.41296
65.m01106_at	0.00747608	4.54437	2.54891	TGME49_077230	hypothetical protein	7.54882	7.33569	7.18959	7.68833	6.40466	4.5167	5.29146	4.81328	6.36855	5.90901	5.99462
65.m02505_at	0.00182418	3.54553	2.02465	TGME49_078450	hypothetical protein	9.66207	9.81892	9.96582	10.4045	7.98601	7.79664	8.53397	8.23068	8.99639	8.90587	8.93319
72.m00003_at	0.00118499	7.44658	4.35309	TGME49_080580	p18 surface antigen	10.124	10.2255	9.4491	10.2953	6.70934	7.07923	7.80866	6.91029	8.00084	7.97654	7.72687
76.m01696_at	0.00111492	7.21066	3.77131	TGME49_087250	hypothetical protein	9.62622	9.38931	9.4196	10.0972	6.18978	6.69602	6.84545	7.40059	7.93281	7.28843	7.93281
8.m00179_at	0.00135774	4.50938	2.65487	TGME49_000270	PAN domain-containing protein	8.32898	8.66349	8.53896	9.06363	6.0437	6.34651	6.92585	6.5873	7.32122	7.28754	7.11163
8.m00188_at	0.00176986	4.18343	2.01281	TGME49_000380	myb-like DNA binding domain-containing protein	7.18932	7.20556	7.27555	7.2586	4.50452	5.21695	5.2202	5.72862	6.32076	6.16506	6.18331
8.m00375_at	0.00968013	2.89062	3.78206	TGME49_000340	hypothetical protein	9.87919	10.1606	9.84289	10.1082	9.40228	8.12413	8.30266	8.03632	7.85244	7.98522	8.39801
80.m00022_at	0.000632997	2.92254	2.34916	TGME49_089140	conserved hypothetical protein	8.37162	8.52171	8.54994	8.61077	7.1285	6.93605	7.16732	6.63328	7.57993	6.88	7.38418
80.m02239_at	0.00250683	3.32037	2.14433	TGME49_089740	hypothetical protein	8.34716	8.37447	7.8825	7.8305	6.44967	6.26667	6.84721	5.9457	7.02266	6.77296	7.22878
80.m05019_at	0.00776617	5.09753	2.13687	TGME49_088430	conserved hypothetical protein	10.3796	10.7526	10.1129	10.3731	6.80422	8.02149	8.81703	8.57612	9.42006	9.13874	9.36825
80.m05025_at	0.00148214	2.09886	2.77984	TGME49_088490	conserved hypothetical protein	7.78953	7.38641	7.7637	7.88261	6.78056	6.59032	6.52469	6.64825	6.09916	6.43533	6.15719
80.m05044_at	0.00247683	3.18179	2.2177	TGME49_091110	conserved hypothetical protein	7.29577	7.49093	6.7995	7.01887	5.03449	5.58026	5.45294	5.85801	6.15548	5.92359	5.92753
83.m01238_at	0.000565547	16.0782	4.9054	TGME49_093780	hypothetical protein	8.77947	8.98461	9.15903	8.69266	4.22841	5.41864	5.41864	4.52198	7.28909	6.33644	6.20319
86.m00390_at	0.000347733	4.65344	2.25694	TGME49_095900	cyclic nucleotide-binding domain-containing protein	8.10819	8.37045	7.90465	8.22124	5.66232	5.9892	5.90757	6.17225	7.1147	7.17936	6.63624
86.m00844_at	0.0012724	3.8062	2.01864	TGME49_096000	hypothetical protein	9.67848	9.55421	9.30745	9.38211	7.65765	7.23702	8.05428	7.2599	8.58686	8.2296	8.58508

## Sheet: IFNKO only
Probesets	Corrected p-value	Fold change: in vitro/IFNKO	GeneID (ToxoDBv5)	Description of parasite gene v4	in vitro 1	in vitro 2	in vitro 3	in vitro 4	in vivo1	in vivo2	in vivo3	in vivo 4	IFNKO 1	IFNKO 2	IFNKO 3
20.m03687_at	0.0177835	2.12327	TGME49_002030	hypothetical protein	9.47576	9.06081	9.15493	9.2647	8.58003	7.89819	8.22269	8.55641	8.09422	8.14651	8.21754
20.m03767_at	0.0358993	3.23238	TGME49_003110	citrate synthase, putative	8.02347	8.40029	8.65229	7.82942	6.166	6.88294	7.05771	5.16242	6.14931	6.43589	7.01611
33.m01326_at	0.0268741	2.23075	TGME49_014980	hypothetical protein	7.01292	7.0928	6.63433	6.92921	5.50841	6.91134	5.90939	7.23164	5.96608	5.46173	5.85156
38.m01058_at	0.0288428	2.40826	TGME49_018950	hypothetical protein	6.51803	6.21029	6.12705	6.23822	5.46524	5.39384	4.37682	5.14605	4.63585	5.34222	5.03815
38.m01063_at	0.0273455	2.12654	TGME49_019490	hypothetical protein	8.15425	8.23268	7.80884	7.83362	6.3037	7.26784	7.14528	5.88045	6.76011	6.83425	7.16216
41.m01389_at	0.0239542	2.01611	TGME49_023060	MORN repeat-containing protein	6.91034	6.51465	6.73269	6.41144	6.27715	5.63985	6.02728	5.48506	5.5704	5.71979	5.60194
42.m03444_at	0.0293	2.27785	TGME49_025740	hypothetical protein	6.77339	7.40469	7.26884	7.33481	6.39118	6.39118	6.01248	5.56406	6.13953	5.81819	6.06556
42.m05850_at	0.0242863	2.01902	TGME49_028380	F-box domain-containing protein	7.22038	7.06564	7.18376	7.48462	6.39714	6.93135	6.53928	6.2781	6.43325	6.18554	6.05605
46.m03690_at	0.0496716	2.03373	TGME49_036880	conserved hypothetical protein	6.02981	5.62835	6.09627	6.52726	4.42728	4.20101	5.64021	4.52308	5.06446	5.13282	4.9416
49.m03097_at	0.0231444	2.02117	TGME49_038260	hypothetical protein	5.89246	5.64918	5.63869	5.8041	4.85623	6.26819	5.60988	4.82793	4.64617	4.97619	4.57038
49.m03185_at	0.0201674	3.29893	TGME49_039920	retinitis pigmentosa GTPase regulator-related	7.36746	7.72451	6.95662	7.36204	5.07389	6.41243	4.79991	5.91261	5.61109	5.57487	5.70602
49.m03232_at	0.0229618	4.3173	TGME49_040770	fatty acid hydroxylase, putative	7.24086	7.35991	7.16491	6.5709	6.26853	5.60318	4.80684	5.37387	5.12472	4.59443	5.20289
49.m03293_at	0.042743	2.09726	TGME49_042580	iron only hydrogenase large subunit	7.56523	7.57153	6.85429	7.49861	5.97243	6.89714	7.04232	6.60318	6.26576	6.43683	6.20915
49.m05641_s_at	0.0477576	2.1607	TGME49_038200	hypothetical protein	5.90789	6.39124	5.95439	5.41894	5.26615	5.1686	5.5646	4.53432	4.84558	4.75913	4.81514
49.m05647_at	0.0212591	2.13672	TGME49_039380	200 kDa antigen p200-related	7.81104	7.98936	7.65743	7.7015	7.07978	6.90787	6.35116	5.92333	6.60185	6.57358	6.90787
50.m03225_at	0.0482216	2.25699	TGME49_048320	mitochondrial carrier protein-related	7.51716	7.71552	7.08179	7.39212	6.57521	5.65034	5.66274	4.34884	6.66011	5.84839	6.24823
50.m07098_at	0.0392823	2.46486	none	hypothetical protein	11.0268	10.8409	10.2074	10.6566	8.0391	8.04557	9.93152	8.5275	9.32244	9.13139	9.69053
50.m07108_s_at	0.0173584	3.70736	TGME49_028070;TGME49_028080	hypothetical protein	7.75348	7.95631	7.24148	7.66876	7.3788	6.86864	6.13511	6.77817	5.74217	5.84839	5.70329
583.m05439_at	0.0299482	2.01698	TGME49_111510	protein kinase domain-containing protein	7.59729	7.97617	7.57936	7.36251	7.23267	7.32707	6.64728	7.90046	6.66938	6.70761	6.47292
59.m03381_at	0.0159526	2.02488	TGME49_068350	hypothetical protein	7.66516	7.82476	7.54671	7.83288	7.58995	7.06776	7.23844	7.36501	6.69641	6.63697	6.76524
59.m07717_at	0.0211025	2.02454	TGME49_073610	hypothetical protein	7.88281	8.15312	7.94717	8.07987	6.51034	7.63452	7.31965	8.04809	6.9572	6.83805	7.1992
59.m07721_at	0.0240914	3.121	TGME49_073300	conserved hypothetical protein	8.13581	8.15688	8.41245	8.68896	8.1205	6.06978	7.19802	6.58146	6.4207	6.61591	7.08293
76.m03401_at	0.0458712	2.31899	TGME49_085300	conserved hypothetical protein	8.21815	8.2588	8.42423	8.99196	7.65154	6.53518	7.68931	6.91534	7.20211	7.00788	7.56938
80.m00066_at	0.0498486	2.31501	TGME49_088450	aldehyde dehydrogenase, putative	7.00087	7.07641	6.36537	6.30069	5.85131	5.61106	5.95725	5.78308	5.33121	5.73539	5.35785
80.m02133_at	0.0226442	2.03142	TGME49_088240	GRIP domain-containing protein	5.53842	5.49435	5.29083	5.45296	4.77799	4.82031	4.7007	4.80613	4.57791	4.52023	4.16679
80.m02138_at	0.0302228	2.15104	TGME49_088290	hypothetical protein	7.30535	7.17945	6.63355	6.94865	6.70049	5.96916	5.17593	6.65184	5.97614	5.93343	5.82558
80.m02241_at	0.0495981	2.10434	TGME49_089760	conserved hypothetical protein	8.30827	8.44815	8.88356	9.08041	6.8777	6.03493	7.82689	6.558	7.81727	7.45529	7.54763
